# Supplementary material for: ASDmiR: A Stepwise Method to Uncover miRNA Regulation Related to Autism Spectrum Disorder
Source: Front Genet. 2020 Oct 14;11:562971. doi: 10.3389/fgene.2020.562971 (PMC7591752; doi:10.3389/fgene.2020.562971)
Supplement: Supplementary Table 2 — miRNA-target interactions and ASD-related miRNAs, lncRNAs, and mRNAs collected in relevant databases. [file Table_2.XLSX]

## Sheet: miRNA-mRNA interactions
miRNA-mRNA interactions
miRNAs	mRNAs
hsa-miR-155-5p	MARCHF1
hsa-miR-335-5p	MARCHF1
hsa-miR-26b-5p	MARCHF1
hsa-miR-100-5p	MARCHF1
hsa-miR-4668-5p	MARCHF1
hsa-miR-5703	MARCHF1
hsa-miR-4434	MARCHF1
hsa-miR-4516	MARCHF1
hsa-miR-4428	MARCHF1
hsa-miR-4659b-3p	MARCHF1
hsa-miR-6875-3p	MARCHF1
hsa-miR-4659a-3p	MARCHF1
hsa-miR-4279	MARCHF1
hsa-miR-6792-3p	MARCHF1
hsa-miR-4691-5p	MARCHF1
hsa-miR-627-3p	MARCHF1
hsa-miR-942-5p	MARCHF1
hsa-miR-140-3p	MARCHF1
hsa-miR-5003-3p	MARCHF1
hsa-miR-34b-3p	MARCHF1
hsa-miR-4446-5p	MARCHF1
hsa-miR-384	MARCHF1
hsa-miR-3685	MARCHF1
hsa-miR-5006-3p	MARCHF1
hsa-miR-4755-5p	MARCHF1
hsa-miR-337-3p	MARCHF1
hsa-miR-211-5p	MARCHF1
hsa-miR-204-5p	MARCHF1
hsa-miR-623	MARCHF1
hsa-miR-8068	MARCHF1
hsa-miR-5087	MARCHF1
hsa-miR-6832-3p	MARCHF1
hsa-miR-4748	MARCHF1
hsa-miR-4464	MARCHF1
hsa-miR-202-5p	MARCHF1
hsa-miR-1299	MARCHF1
hsa-miR-130a-3p	MARCHF1
hsa-miR-16-1-3p	MARCHF1
hsa-miR-190a-5p	MARCHF1
hsa-miR-190b	MARCHF1
hsa-miR-29a-3p	MARCHF1
hsa-miR-29b-3p	MARCHF1
hsa-miR-29c-3p	MARCHF1
hsa-miR-485-3p	MARCHF1
hsa-miR-21-5p	MARCHF1
hsa-miR-26a-5p	MARCHF1
hsa-miR-335-3p	MARCHF1
hsa-miR-424-5p	MARCHF1
hsa-miR-497-5p	MARCHF1
hsa-miR-522-5p	MARCHF1
hsa-miR-545-5p	MARCHF1
hsa-miR-548d-3p	MARCHF1
hsa-miR-548e-3p	MARCHF1
hsa-miR-99b-3p	MARCHF1
hsa-miR-1-3p	MARCHF1
hsa-miR-16-5p	MARCHF1
hsa-miR-1343-3p	MARCHF1
hsa-miR-124-3p	MARCHF1
hsa-miR-146a-5p	MARCHF1
hsa-miR-200c-3p	MARCHF1
hsa-miR-520f-3p	MARCHF1
hsa-miR-374a-5p	MARCHF1
hsa-miR-148b-3p	MARCHF2
hsa-miR-155-5p	MARCHF2
hsa-miR-26b-5p	MARCHF2
hsa-miR-377-3p	MARCHF2
hsa-miR-6837-3p	MARCHF2
hsa-miR-6754-3p	MARCHF2
hsa-miR-412-3p	MARCHF2
hsa-miR-345-3p	MARCHF2
hsa-miR-141-5p	MARCHF2
hsa-miR-6768-5p	MARCHF2
hsa-miR-6732-3p	MARCHF2
hsa-miR-548as-3p	MARCHF2
hsa-miR-548z	MARCHF2
hsa-miR-548h-3p	MARCHF2
hsa-miR-548d-3p	MARCHF2
hsa-miR-548bb-3p	MARCHF2
hsa-miR-548ac	MARCHF2
hsa-miR-6881-3p	MARCHF2
hsa-miR-1236-3p	MARCHF2
hsa-miR-877-3p	MARCHF2
hsa-miR-4793-5p	MARCHF2
hsa-miR-5196-3p	MARCHF2
hsa-miR-513b-3p	MARCHF2
hsa-miR-34a-5p	MARCHF2
hsa-miR-4487	MARCHF2
hsa-miR-664a-3p	MARCHF2
hsa-miR-124-3p	MARCHF2
hsa-miR-130a-3p	MARCHF2
hsa-miR-147a	MARCHF2
hsa-miR-16-5p	MARCHF2
hsa-miR-195-5p	MARCHF2
hsa-miR-21-3p	MARCHF2
hsa-miR-27a-3p	MARCHF2
hsa-miR-27a-5p	MARCHF2
hsa-miR-186-5p	MARCHF2
hsa-miR-522-5p	MARCHF2
hsa-miR-7-5p	MARCHF2
hsa-miR-200b-3p	MARCHF2
hsa-miR-330-3p	MARCHF2
hsa-miR-99b-5p	MARCHF2
hsa-miR-26b-5p	MARCHF3
hsa-miR-744-5p	MARCHF3
hsa-miR-4455	MARCHF3
hsa-miR-574-5p	MARCHF3
hsa-miR-190a-3p	MARCHF3
hsa-miR-889-3p	MARCHF3
hsa-miR-6867-5p	MARCHF3
hsa-miR-5011-5p	MARCHF3
hsa-miR-511-3p	MARCHF3
hsa-miR-1277-5p	MARCHF3
hsa-miR-4776-3p	MARCHF3
hsa-miR-4715-3p	MARCHF3
hsa-miR-3064-3p	MARCHF3
hsa-miR-3119	MARCHF3
hsa-miR-129-5p	MARCHF3
hsa-miR-4438	MARCHF3
hsa-miR-510-3p	MARCHF3
hsa-miR-203a-3p	MARCHF3
hsa-let-7d-5p	MARCHF3
hsa-miR-181a-5p	MARCHF3
hsa-miR-20a-5p	MARCHF3
hsa-miR-22-5p	MARCHF3
hsa-miR-24-3p	MARCHF3
hsa-miR-25-3p	MARCHF3
hsa-miR-32-5p	MARCHF3
hsa-miR-34a-5p	MARCHF3
hsa-miR-628-5p	MARCHF3
hsa-miR-92a-3p	MARCHF3
hsa-miR-103a-3p	MARCHF3
hsa-miR-107	MARCHF3
hsa-miR-129-2-3p	MARCHF3
hsa-miR-194-5p	MARCHF3
hsa-miR-200b-3p	MARCHF3
hsa-miR-21-3p	MARCHF3
hsa-miR-214-3p	MARCHF3
hsa-miR-27a-5p	MARCHF3
hsa-miR-429	MARCHF3
hsa-miR-373-3p	MARCHF4
hsa-miR-320a	MARCHF4
hsa-miR-4645-3p	MARCHF4
hsa-miR-8054	MARCHF4
hsa-miR-548k	MARCHF4
hsa-miR-548av-5p	MARCHF4
hsa-miR-548n	MARCHF4
hsa-miR-106a-5p	MARCHF4
hsa-miR-17-5p	MARCHF4
hsa-miR-106b-5p	MARCHF4
hsa-miR-2276-5p	MARCHF4
hsa-miR-7108-3p	MARCHF4
hsa-miR-4258	MARCHF4
hsa-miR-361-3p	MARCHF4
hsa-miR-6764-5p	MARCHF4
hsa-miR-1915-3p	MARCHF4
hsa-miR-6837-5p	MARCHF4
hsa-miR-4685-5p	MARCHF4
hsa-miR-4999-3p	MARCHF4
hsa-miR-6865-3p	MARCHF4
hsa-miR-5088-5p	MARCHF4
hsa-miR-574-5p	MARCHF4
hsa-miR-6809-3p	MARCHF4
hsa-miR-6833-3p	MARCHF4
hsa-miR-4768-5p	MARCHF4
hsa-miR-4684-5p	MARCHF4
hsa-miR-6867-5p	MARCHF4
hsa-miR-4669	MARCHF4
hsa-miR-3657	MARCHF4
hsa-miR-3650	MARCHF4
hsa-miR-4455	MARCHF4
hsa-miR-6747-5p	MARCHF4
hsa-miR-1251-5p	MARCHF4
hsa-miR-517-5p	MARCHF4
hsa-miR-6782-5p	MARCHF4
hsa-miR-3607-3p	MARCHF4
hsa-miR-486-5p	MARCHF4
hsa-miR-30a-5p	MARCHF4
hsa-miR-30b-5p	MARCHF4
hsa-miR-30e-5p	MARCHF4
hsa-miR-30d-5p	MARCHF4
hsa-miR-30c-5p	MARCHF4
hsa-miR-181d-5p	MARCHF4
hsa-miR-335-3p	MARCHF4
hsa-miR-4694-5p	MARCHF4
hsa-miR-29b-2-5p	MARCHF4
hsa-miR-571	MARCHF4
hsa-miR-4289	MARCHF4
hsa-miR-103a-3p	MARCHF4
hsa-miR-107	MARCHF4
hsa-miR-1343-3p	MARCHF4
hsa-let-7b-5p	MARCHF4
hsa-miR-16-5p	MARCHF4
hsa-miR-182-5p	MARCHF4
hsa-miR-203a-3p	MARCHF4
hsa-miR-21-3p	MARCHF4
hsa-miR-27a-5p	MARCHF4
hsa-miR-376a-5p	MARCHF4
hsa-miR-30a-5p	MARCHF5
hsa-let-7e-5p	MARCHF5
hsa-miR-34a-5p	MARCHF5
hsa-miR-6797-3p	MARCHF5
hsa-miR-6076	MARCHF5
hsa-miR-6807-3p	MARCHF5
hsa-miR-217	MARCHF5
hsa-miR-8485	MARCHF5
hsa-miR-3941	MARCHF5
hsa-miR-4719	MARCHF5
hsa-miR-603	MARCHF5
hsa-miR-362-3p	MARCHF5
hsa-miR-329-3p	MARCHF5
hsa-miR-103a-2-5p	MARCHF5
hsa-miR-126-5p	MARCHF5
hsa-miR-15a-5p	MARCHF5
hsa-miR-15b-5p	MARCHF5
hsa-miR-16-5p	MARCHF5
hsa-miR-17-3p	MARCHF5
hsa-miR-183-5p	MARCHF5
hsa-miR-18a-3p	MARCHF5
hsa-miR-195-5p	MARCHF5
hsa-miR-216a-5p	MARCHF5
hsa-miR-23a-3p	MARCHF5
hsa-miR-23b-3p	MARCHF5
hsa-miR-25-3p	MARCHF5
hsa-miR-27a-3p	MARCHF5
hsa-miR-338-3p	MARCHF5
hsa-miR-339-5p	MARCHF5
hsa-miR-33a-5p	MARCHF5
hsa-miR-361-5p	MARCHF5
hsa-miR-424-5p	MARCHF5
hsa-miR-425-5p	MARCHF5
hsa-miR-450a-5p	MARCHF5
hsa-miR-497-5p	MARCHF5
hsa-miR-503-5p	MARCHF5
hsa-miR-520a-3p	MARCHF5
hsa-miR-520c-3p	MARCHF5
hsa-miR-589-3p	MARCHF5
hsa-miR-7-5p	MARCHF5
hsa-miR-92a-3p	MARCHF5
hsa-miR-9-5p	MARCHF5
hsa-miR-377-3p	MARCHF5
hsa-miR-1-3p	MARCHF5
hsa-miR-941	MARCHF5
hsa-miR-10a-5p	MARCHF5
hsa-miR-25-3p	MARCHF6
hsa-miR-16-5p	MARCHF6
hsa-let-7b-5p	MARCHF6
hsa-miR-190a-3p	MARCHF6
hsa-miR-101-5p	MARCHF6
hsa-miR-6502-5p	MARCHF6
hsa-miR-1277-5p	MARCHF6
hsa-miR-1301-5p	MARCHF6
hsa-miR-520f-5p	MARCHF6
hsa-miR-4509	MARCHF6
hsa-miR-4744	MARCHF6
hsa-miR-4796-3p	MARCHF6
hsa-miR-93-5p	MARCHF6
hsa-miR-526b-3p	MARCHF6
hsa-miR-519d-3p	MARCHF6
hsa-miR-20b-5p	MARCHF6
hsa-miR-20a-5p	MARCHF6
hsa-miR-17-5p	MARCHF6
hsa-miR-106b-5p	MARCHF6
hsa-miR-106a-5p	MARCHF6
hsa-miR-548ah-5p	MARCHF6
hsa-miR-3609	MARCHF6
hsa-miR-200a-3p	MARCHF6
hsa-miR-141-3p	MARCHF6
hsa-miR-5011-5p	MARCHF6
hsa-miR-5187-3p	MARCHF6
hsa-miR-345-3p	MARCHF6
hsa-miR-888-5p	MARCHF6
hsa-miR-562	MARCHF6
hsa-miR-6732-3p	MARCHF6
hsa-miR-3646	MARCHF6
hsa-miR-3662	MARCHF6
hsa-miR-889-3p	MARCHF6
hsa-miR-549a	MARCHF6
hsa-miR-708-3p	MARCHF6
hsa-miR-28-3p	MARCHF6
hsa-miR-202-5p	MARCHF6
hsa-miR-3152-5p	MARCHF6
hsa-miR-4774-3p	MARCHF6
hsa-miR-29a-5p	MARCHF6
hsa-miR-6513-5p	MARCHF6
hsa-miR-887-5p	MARCHF6
hsa-miR-3913-5p	MARCHF6
hsa-miR-3122	MARCHF6
hsa-miR-450a-1-3p	MARCHF6
hsa-miR-6780a-5p	MARCHF6
hsa-miR-6779-5p	MARCHF6
hsa-miR-3689c	MARCHF6
hsa-miR-3689b-3p	MARCHF6
hsa-miR-3689a-3p	MARCHF6
hsa-miR-30b-3p	MARCHF6
hsa-miR-1273h-5p	MARCHF6
hsa-miR-6788-5p	MARCHF6
hsa-miR-30c-2-3p	MARCHF6
hsa-miR-30c-1-3p	MARCHF6
hsa-miR-7977	MARCHF6
hsa-miR-920	MARCHF6
hsa-miR-5591-5p	MARCHF6
hsa-miR-6726-5p	MARCHF6
hsa-miR-4300	MARCHF6
hsa-miR-6090	MARCHF6
hsa-miR-6827-5p	MARCHF6
hsa-miR-7154-3p	MARCHF6
hsa-miR-6814-5p	MARCHF6
hsa-miR-383-3p	MARCHF6
hsa-miR-6891-5p	MARCHF6
hsa-miR-3173-3p	MARCHF6
hsa-miR-30e-5p	MARCHF6
hsa-miR-30d-5p	MARCHF6
hsa-miR-30b-5p	MARCHF6
hsa-miR-30c-5p	MARCHF6
hsa-miR-30a-5p	MARCHF6
hsa-miR-1285-3p	MARCHF6
hsa-miR-196a-3p	MARCHF6
hsa-miR-3120-5p	MARCHF6
hsa-miR-3187-5p	MARCHF6
hsa-miR-3664-5p	MARCHF6
hsa-miR-4432	MARCHF6
hsa-miR-4522	MARCHF6
hsa-miR-4793-3p	MARCHF6
hsa-miR-4797-5p	MARCHF6
hsa-miR-499a-5p	MARCHF6
hsa-miR-508-5p	MARCHF6
hsa-miR-5189-5p	MARCHF6
hsa-miR-612	MARCHF6
hsa-miR-6510-3p	MARCHF6
hsa-miR-6512-3p	MARCHF6
hsa-miR-661	MARCHF6
hsa-miR-6720-5p	MARCHF6
hsa-miR-6860	MARCHF6
hsa-miR-6888-3p	MARCHF6
hsa-miR-766-3p	MARCHF6
hsa-miR-7703	MARCHF6
hsa-miR-8087	MARCHF6
hsa-miR-939-3p	MARCHF6
hsa-miR-3135a	MARCHF6
hsa-let-7b-3p	MARCHF6
hsa-let-7f-2-3p	MARCHF6
hsa-miR-10a-5p	MARCHF6
hsa-miR-10b-5p	MARCHF6
hsa-miR-125a-3p	MARCHF6
hsa-miR-1276	MARCHF6
hsa-miR-1290	MARCHF6
hsa-miR-130b-5p	MARCHF6
hsa-miR-140-3p	MARCHF6
hsa-miR-146a-3p	MARCHF6
hsa-miR-147b	MARCHF6
hsa-miR-155-5p	MARCHF6
hsa-miR-15a-5p	MARCHF6
hsa-miR-15b-5p	MARCHF6
hsa-miR-181a-2-3p	MARCHF6
hsa-miR-181a-5p	MARCHF6
hsa-miR-181b-5p	MARCHF6
hsa-miR-181c-5p	MARCHF6
hsa-miR-181d-5p	MARCHF6
hsa-miR-185-5p	MARCHF6
hsa-miR-186-5p	MARCHF6
hsa-miR-18a-5p	MARCHF6
hsa-miR-199a-3p	MARCHF6
hsa-miR-19a-5p	MARCHF6
hsa-miR-19b-1-5p	MARCHF6
hsa-miR-200b-3p	MARCHF6
hsa-miR-200c-3p	MARCHF6
hsa-miR-210-3p	MARCHF6
hsa-miR-21-5p	MARCHF6
hsa-miR-218-5p	MARCHF6
hsa-miR-223-3p	MARCHF6
hsa-miR-22-3p	MARCHF6
hsa-miR-23a-3p	MARCHF6
hsa-miR-23b-3p	MARCHF6
hsa-miR-27a-3p	MARCHF6
hsa-miR-27b-3p	MARCHF6
hsa-miR-27b-5p	MARCHF6
hsa-miR-28-5p	MARCHF6
hsa-miR-298	MARCHF6
hsa-miR-302c-5p	MARCHF6
hsa-miR-3127-5p	MARCHF6
hsa-miR-33a-3p	MARCHF6
hsa-miR-342-3p	MARCHF6
hsa-miR-345-5p	MARCHF6
hsa-miR-34a-5p	MARCHF6
hsa-miR-3619-5p	MARCHF6
hsa-miR-3685	MARCHF6
hsa-miR-369-3p	MARCHF6
hsa-miR-374c-5p	MARCHF6
hsa-miR-375	MARCHF6
hsa-miR-3928-3p	MARCHF6
hsa-miR-424-3p	MARCHF6
hsa-miR-424-5p	MARCHF6
hsa-miR-429	MARCHF6
hsa-miR-452-5p	MARCHF6
hsa-miR-4690-5p	MARCHF6
hsa-miR-4691-3p	MARCHF6
hsa-miR-4786-3p	MARCHF6
hsa-miR-497-5p	MARCHF6
hsa-miR-499a-3p	MARCHF6
hsa-miR-500a-5p	MARCHF6
hsa-miR-5010-3p	MARCHF6
hsa-miR-501-3p	MARCHF6
hsa-miR-501-5p	MARCHF6
hsa-miR-502-3p	MARCHF6
hsa-miR-503-5p	MARCHF6
hsa-miR-522-5p	MARCHF6
hsa-miR-548a-5p	MARCHF6
hsa-miR-548an	MARCHF6
hsa-miR-548h-5p	MARCHF6
hsa-miR-548j-5p	MARCHF6
hsa-miR-548l	MARCHF6
hsa-miR-548n	MARCHF6
hsa-miR-548o-3p	MARCHF6
hsa-miR-5699-3p	MARCHF6
hsa-miR-576-3p	MARCHF6
hsa-miR-579-3p	MARCHF6
hsa-miR-582-5p	MARCHF6
hsa-miR-590-3p	MARCHF6
hsa-miR-590-5p	MARCHF6
hsa-miR-605-5p	MARCHF6
hsa-miR-651-5p	MARCHF6
hsa-miR-653-5p	MARCHF6
hsa-miR-671-5p	MARCHF6
hsa-miR-708-5p	MARCHF6
hsa-miR-942-5p	MARCHF6
hsa-miR-99a-3p	MARCHF6
hsa-miR-99b-3p	MARCHF6
hsa-miR-132-3p	MARCHF6
hsa-miR-137	MARCHF6
hsa-miR-139-5p	MARCHF6
hsa-miR-145-5p	MARCHF6
hsa-miR-377-3p	MARCHF6
hsa-miR-382-5p	MARCHF6
hsa-miR-432-5p	MARCHF6
hsa-miR-495-3p	MARCHF6
hsa-miR-9-3p	MARCHF6
hsa-miR-1-3p	MARCHF6
hsa-miR-191-5p	MARCHF6
hsa-miR-146a-5p	MARCHF6
hsa-miR-224-5p	MARCHF6
hsa-miR-18b-5p	MARCHF6
hsa-miR-411-5p	MARCHF7
hsa-miR-6829-3p	MARCHF7
hsa-miR-6791-3p	MARCHF7
hsa-miR-1976	MARCHF7
hsa-miR-3653-5p	MARCHF7
hsa-miR-6747-3p	MARCHF7
hsa-miR-6727-3p	MARCHF7
hsa-miR-4722-3p	MARCHF7
hsa-let-7a-3p	MARCHF7
hsa-let-7a-5p	MARCHF7
hsa-let-7b-5p	MARCHF7
hsa-let-7c-5p	MARCHF7
hsa-let-7d-5p	MARCHF7
hsa-let-7e-5p	MARCHF7
hsa-let-7f-5p	MARCHF7
hsa-let-7g-3p	MARCHF7
hsa-let-7i-5p	MARCHF7
hsa-miR-101-3p	MARCHF7
hsa-miR-103a-3p	MARCHF7
hsa-miR-106a-5p	MARCHF7
hsa-miR-106b-5p	MARCHF7
hsa-miR-107	MARCHF7
hsa-miR-124-3p	MARCHF7
hsa-miR-125a-5p	MARCHF7
hsa-miR-125b-5p	MARCHF7
hsa-miR-126-5p	MARCHF7
hsa-miR-138-1-3p	MARCHF7
hsa-miR-141-3p	MARCHF7
hsa-miR-142-3p	MARCHF7
hsa-miR-148a-3p	MARCHF7
hsa-miR-148b-3p	MARCHF7
hsa-miR-150-3p	MARCHF7
hsa-miR-150-5p	MARCHF7
hsa-miR-152-3p	MARCHF7
hsa-miR-15a-5p	MARCHF7
hsa-miR-15b-5p	MARCHF7
hsa-miR-16-5p	MARCHF7
hsa-miR-17-5p	MARCHF7
hsa-miR-186-5p	MARCHF7
hsa-miR-195-5p	MARCHF7
hsa-miR-196a-5p	MARCHF7
hsa-miR-196b-5p	MARCHF7
hsa-miR-19a-3p	MARCHF7
hsa-miR-19b-3p	MARCHF7
hsa-miR-200a-3p	MARCHF7
hsa-miR-203a-3p	MARCHF7
hsa-miR-20a-5p	MARCHF7
hsa-miR-20b-5p	MARCHF7
hsa-miR-210-3p	MARCHF7
hsa-miR-218-5p	MARCHF7
hsa-miR-23a-3p	MARCHF7
hsa-miR-23b-3p	MARCHF7
hsa-miR-30a-5p	MARCHF7
hsa-miR-30b-5p	MARCHF7
hsa-miR-30c-5p	MARCHF7
hsa-miR-30d-5p	MARCHF7
hsa-miR-30e-5p	MARCHF7
hsa-miR-31-5p	MARCHF7
hsa-miR-32-3p	MARCHF7
hsa-miR-32-5p	MARCHF7
hsa-miR-361-3p	MARCHF7
hsa-miR-425-3p	MARCHF7
hsa-miR-4518	MARCHF7
hsa-miR-489-3p	MARCHF7
hsa-miR-493-5p	MARCHF7
hsa-miR-494-3p	MARCHF7
hsa-miR-5008-3p	MARCHF7
hsa-miR-506-3p	MARCHF7
hsa-miR-5100	MARCHF7
hsa-miR-513b-5p	MARCHF7
hsa-miR-548am-5p	MARCHF7
hsa-miR-548c-5p	MARCHF7
hsa-miR-548d-5p	MARCHF7
hsa-miR-548o-5p	MARCHF7
hsa-miR-548w	MARCHF7
hsa-miR-582-5p	MARCHF7
hsa-miR-606	MARCHF7
hsa-miR-629-3p	MARCHF7
hsa-miR-654-5p	MARCHF7
hsa-miR-664a-3p	MARCHF7
hsa-miR-92a-3p	MARCHF7
hsa-miR-92b-3p	MARCHF7
hsa-miR-93-5p	MARCHF7
hsa-miR-942-5p	MARCHF7
hsa-miR-98-5p	MARCHF7
hsa-miR-136-3p	MARCHF7
hsa-miR-338-3p	MARCHF7
hsa-miR-433-3p	MARCHF7
hsa-miR-4701-3p	MARCHF7
hsa-miR-191-5p	MARCHF7
hsa-miR-155-5p	MARCHF7
hsa-miR-335-5p	MARCHF8
hsa-miR-1263	MARCHF8
hsa-miR-130a-3p	MARCHF8
hsa-miR-130b-3p	MARCHF8
hsa-miR-137	MARCHF8
hsa-miR-142-3p	MARCHF8
hsa-miR-148a-5p	MARCHF8
hsa-miR-199a-5p	MARCHF8
hsa-miR-199b-5p	MARCHF8
hsa-miR-200b-3p	MARCHF8
hsa-miR-200c-3p	MARCHF8
hsa-miR-210-3p	MARCHF8
hsa-miR-221-5p	MARCHF8
hsa-miR-22-3p	MARCHF8
hsa-miR-23b-5p	MARCHF8
hsa-miR-24-3p	MARCHF8
hsa-miR-25-3p	MARCHF8
hsa-miR-301a-3p	MARCHF8
hsa-miR-301b-3p	MARCHF8
hsa-miR-34a-5p	MARCHF8
hsa-miR-3653-3p	MARCHF8
hsa-miR-3928-3p	MARCHF8
hsa-miR-449a	MARCHF8
hsa-miR-548au-3p	MARCHF8
hsa-miR-627-5p	MARCHF8
hsa-miR-652-5p	MARCHF8
hsa-miR-877-5p	MARCHF8
hsa-miR-92a-3p	MARCHF8
hsa-miR-1343-3p	MARCHF8
hsa-miR-106b-5p	MARCHF8
hsa-miR-126-3p	MARCHF8
hsa-miR-224-5p	MARCHF8
hsa-miR-27a-3p	MARCHF8
hsa-miR-92a-2-5p	MARCHF9
hsa-miR-491-5p	MARCHF9
hsa-miR-146b-3p	MARCHF9
hsa-miR-608	MARCHF9
hsa-miR-874-3p	MARCHF9
hsa-miR-2110	MARCHF9
hsa-miR-3173-5p	MARCHF9
hsa-miR-3187-3p	MARCHF9
hsa-miR-4271	MARCHF9
hsa-miR-4651	MARCHF9
hsa-miR-4725-3p	MARCHF9
hsa-miR-6737-5p	MARCHF9
hsa-miR-6756-5p	MARCHF9
hsa-miR-6766-5p	MARCHF9
hsa-miR-6799-3p	MARCHF9
hsa-miR-6812-5p	MARCHF9
hsa-miR-6819-5p	MARCHF9
hsa-miR-6780b-5p	MARCHF9
hsa-miR-6890-5p	MARCHF9
hsa-miR-7108-5p	MARCHF9
hsa-miR-7976	MARCHF9
hsa-miR-649	MARCHF9
hsa-miR-6715a-3p	MARCHF9
hsa-miR-6715b-3p	MARCHF9
hsa-miR-6808-3p	MARCHF9
hsa-miR-7973	MARCHF9
hsa-miR-4725-5p	MARCHF9
hsa-miR-181d-3p	MARCHF9
hsa-miR-5006-5p	MARCHF9
hsa-miR-3972	MARCHF9
hsa-miR-1202	MARCHF9
hsa-miR-663b	MARCHF9
hsa-miR-6747-5p	MARCHF9
hsa-miR-4664-5p	MARCHF9
hsa-miR-342-5p	MARCHF9
hsa-miR-4529-5p	MARCHF9
hsa-miR-6782-5p	MARCHF9
hsa-miR-137	MARCHF9
hsa-miR-3618	MARCHF9
hsa-miR-139-5p	MARCHF9
hsa-miR-3923	MARCHF9
hsa-miR-548av-3p	MARCHF9
hsa-miR-548g-3p	MARCHF9
hsa-miR-1224-5p	MARCHF9
hsa-miR-126-5p	MARCHF9
hsa-miR-1307-5p	MARCHF9
hsa-miR-143-3p	MARCHF9
hsa-miR-149-5p	MARCHF9
hsa-miR-1537-3p	MARCHF9
hsa-miR-18a-3p	MARCHF9
hsa-miR-1908-5p	MARCHF9
hsa-miR-1910-5p	MARCHF9
hsa-miR-1913	MARCHF9
hsa-miR-197-3p	MARCHF9
hsa-miR-199a-5p	MARCHF9
hsa-miR-199b-5p	MARCHF9
hsa-miR-19a-3p	MARCHF9
hsa-miR-19b-3p	MARCHF9
hsa-miR-2114-5p	MARCHF9
hsa-miR-22-3p	MARCHF9
hsa-miR-30a-5p	MARCHF9
hsa-miR-30b-5p	MARCHF9
hsa-miR-30c-5p	MARCHF9
hsa-miR-30d-5p	MARCHF9
hsa-miR-30e-5p	MARCHF9
hsa-miR-455-3p	MARCHF9
hsa-miR-548ar-3p	MARCHF9
hsa-miR-550a-3p	MARCHF9
hsa-miR-5690	MARCHF9
hsa-miR-627-5p	MARCHF9
hsa-miR-766-5p	MARCHF9
hsa-miR-92a-3p	MARCHF9
hsa-miR-92b-3p	MARCHF9
hsa-miR-129-2-3p	MARCHF9
hsa-miR-27a-3p	MARCHF9
hsa-miR-7-5p	MARCHF9
hsa-let-7g-5p	MARCHF9
hsa-let-7i-5p	MARCHF9
hsa-miR-15b-5p	MARCHF9
hsa-miR-1343-3p	MARCHF10
hsa-miR-146a-5p	MARCHF10
hsa-miR-335-5p	MARCHF11
hsa-miR-124-3p	MARCHF12
hsa-miR-101-3p	MARCHF13
hsa-miR-27a-3p	MARCHF14
hsa-miR-335-5p	SEPTIN1
hsa-miR-34a-5p	SEPTIN1
hsa-miR-320a	SEPTIN1
hsa-miR-192-3p	SEPTIN1
hsa-miR-129-2-3p	SEPTIN1
hsa-miR-26a-5p	SEPTIN1
hsa-miR-27a-3p	SEPTIN1
hsa-miR-373-3p	SEPTIN2
hsa-miR-124-3p	SEPTIN2
hsa-miR-877-3p	SEPTIN2
hsa-miR-744-5p	SEPTIN2
hsa-miR-421	SEPTIN2
hsa-miR-652-3p	SEPTIN2
hsa-miR-615-3p	SEPTIN2
hsa-miR-15b-5p	SEPTIN2
hsa-miR-106a-5p	SEPTIN2
hsa-miR-23a-3p	SEPTIN2
hsa-miR-20a-5p	SEPTIN2
hsa-miR-17-5p	SEPTIN2
hsa-miR-7-5p	SEPTIN2
hsa-miR-181a-5p	SEPTIN2
hsa-miR-181b-5p	SEPTIN2
hsa-miR-181c-5p	SEPTIN2
hsa-miR-140-5p	SEPTIN2
hsa-miR-181d-5p	SEPTIN2
hsa-miR-641	SEPTIN2
hsa-miR-3162-5p	SEPTIN2
hsa-miR-4262	SEPTIN2
hsa-miR-3617-5p	SEPTIN2
hsa-miR-4460	SEPTIN2
hsa-miR-203b-5p	SEPTIN2
hsa-miR-4727-3p	SEPTIN2
hsa-miR-6718-5p	SEPTIN2
hsa-miR-6760-5p	SEPTIN2
hsa-miR-6878-5p	SEPTIN2
hsa-miR-223-3p	SEPTIN2
hsa-miR-504-3p	SEPTIN2
hsa-miR-4433a-3p	SEPTIN2
hsa-miR-4459	SEPTIN2
hsa-miR-4768-3p	SEPTIN2
hsa-miR-4433b-3p	SEPTIN2
hsa-miR-15a-5p	SEPTIN2
hsa-miR-16-5p	SEPTIN2
hsa-miR-195-5p	SEPTIN2
hsa-miR-3163	SEPTIN2
hsa-miR-93-5p	SEPTIN2
hsa-miR-143-5p	SEPTIN2
hsa-miR-106b-5p	SEPTIN2
hsa-miR-20b-5p	SEPTIN2
hsa-miR-519c-3p	SEPTIN2
hsa-miR-526b-3p	SEPTIN2
hsa-miR-519b-3p	SEPTIN2
hsa-miR-519d-3p	SEPTIN2
hsa-miR-519a-3p	SEPTIN2
hsa-miR-4464	SEPTIN2
hsa-miR-4748	SEPTIN2
hsa-miR-21-5p	SEPTIN2
hsa-miR-8063	SEPTIN2
hsa-miR-4427	SEPTIN2
hsa-miR-4680-3p	SEPTIN2
hsa-miR-5187-3p	SEPTIN2
hsa-miR-4704-5p	SEPTIN2
hsa-miR-4796-3p	SEPTIN2
hsa-miR-548ah-5p	SEPTIN2
hsa-miR-3609	SEPTIN2
hsa-miR-3143	SEPTIN2
hsa-miR-4756-5p	SEPTIN2
hsa-miR-4739	SEPTIN2
hsa-miR-1321	SEPTIN2
hsa-miR-543	SEPTIN2
hsa-miR-6847-3p	SEPTIN2
hsa-miR-548c-3p	SEPTIN2
hsa-miR-101-3p	SEPTIN2
hsa-miR-101-5p	SEPTIN2
hsa-miR-103a-3p	SEPTIN2
hsa-miR-107	SEPTIN2
hsa-miR-1246	SEPTIN2
hsa-miR-126-5p	SEPTIN2
hsa-miR-1296-5p	SEPTIN2
hsa-miR-1305	SEPTIN2
hsa-miR-130a-3p	SEPTIN2
hsa-miR-130b-3p	SEPTIN2
hsa-miR-144-3p	SEPTIN2
hsa-miR-146a-3p	SEPTIN2
hsa-miR-147b	SEPTIN2
hsa-miR-148a-3p	SEPTIN2
hsa-miR-15b-3p	SEPTIN2
hsa-miR-16-1-3p	SEPTIN2
hsa-miR-17-3p	SEPTIN2
hsa-miR-186-5p	SEPTIN2
hsa-miR-192-5p	SEPTIN2
hsa-miR-197-3p	SEPTIN2
hsa-miR-199a-3p	SEPTIN2
hsa-miR-199b-3p	SEPTIN2
hsa-miR-19a-5p	SEPTIN2
hsa-miR-203a-3p	SEPTIN2
hsa-miR-205-5p	SEPTIN2
hsa-miR-20a-3p	SEPTIN2
hsa-miR-21-3p	SEPTIN2
hsa-miR-215-5p	SEPTIN2
hsa-miR-222-5p	SEPTIN2
hsa-miR-224-5p	SEPTIN2
hsa-miR-2467-5p	SEPTIN2
hsa-miR-27a-3p	SEPTIN2
hsa-miR-27b-3p	SEPTIN2
hsa-miR-28-3p	SEPTIN2
hsa-miR-301a-3p	SEPTIN2
hsa-miR-301a-5p	SEPTIN2
hsa-miR-301b-3p	SEPTIN2
hsa-miR-340-5p	SEPTIN2
hsa-miR-34a-5p	SEPTIN2
hsa-miR-3661	SEPTIN2
hsa-miR-377-5p	SEPTIN2
hsa-miR-3944-5p	SEPTIN2
hsa-miR-424-5p	SEPTIN2
hsa-miR-425-5p	SEPTIN2
hsa-miR-4473	SEPTIN2
hsa-miR-450b-5p	SEPTIN2
hsa-miR-4524a-5p	SEPTIN2
hsa-miR-454-3p	SEPTIN2
hsa-miR-4705	SEPTIN2
hsa-miR-484	SEPTIN2
hsa-miR-485-3p	SEPTIN2
hsa-miR-497-5p	SEPTIN2
hsa-miR-499a-3p	SEPTIN2
hsa-miR-499a-5p	SEPTIN2
hsa-miR-503-5p	SEPTIN2
hsa-miR-511-5p	SEPTIN2
hsa-miR-518c-5p	SEPTIN2
hsa-miR-522-5p	SEPTIN2
hsa-miR-548a-3p	SEPTIN2
hsa-miR-551b-5p	SEPTIN2
hsa-miR-588	SEPTIN2
hsa-miR-593-5p	SEPTIN2
hsa-miR-627-5p	SEPTIN2
hsa-miR-651-5p	SEPTIN2
hsa-miR-671-5p	SEPTIN2
hsa-miR-877-5p	SEPTIN2
hsa-miR-9-5p	SEPTIN2
hsa-miR-26a-5p	SEPTIN2
hsa-miR-338-3p	SEPTIN2
hsa-miR-377-3p	SEPTIN2
hsa-miR-432-5p	SEPTIN2
hsa-miR-574-5p	SEPTIN2
hsa-miR-1-3p	SEPTIN2
hsa-miR-23b-3p	SEPTIN2
hsa-miR-146a-5p	SEPTIN2
hsa-miR-155-5p	SEPTIN2
hsa-miR-30a-5p	SEPTIN2
hsa-miR-18a-5p	SEPTIN2
hsa-miR-18b-5p	SEPTIN2
hsa-miR-19b-3p	SEPTIN2
hsa-miR-29b-3p	SEPTIN2
hsa-miR-29c-3p	SEPTIN2
hsa-miR-520f-3p	SEPTIN2
hsa-miR-122-5p	SEPTIN2
hsa-miR-7856-5p	SEPTIN3
hsa-miR-4477b	SEPTIN3
hsa-miR-671-5p	SEPTIN3
hsa-miR-4725-5p	SEPTIN3
hsa-miR-4786-3p	SEPTIN3
hsa-miR-651-3p	SEPTIN3
hsa-miR-8485	SEPTIN3
hsa-miR-377-3p	SEPTIN3
hsa-miR-6873-3p	SEPTIN3
hsa-miR-215-3p	SEPTIN3
hsa-miR-6773-3p	SEPTIN3
hsa-miR-6817-3p	SEPTIN3
hsa-miR-7110-3p	SEPTIN3
hsa-miR-106b-5p	SEPTIN3
hsa-miR-139-5p	SEPTIN3
hsa-miR-143-3p	SEPTIN3
hsa-miR-17-5p	SEPTIN3
hsa-miR-20a-5p	SEPTIN3
hsa-miR-328-3p	SEPTIN3
hsa-miR-331-3p	SEPTIN3
hsa-miR-34a-5p	SEPTIN3
hsa-miR-522-5p	SEPTIN3
hsa-miR-92a-1-5p	SEPTIN3
hsa-miR-935	SEPTIN3
hsa-miR-93-5p	SEPTIN3
hsa-miR-15a-5p	SEPTIN3
hsa-miR-15b-5p	SEPTIN3
hsa-miR-16-5p	SEPTIN3
hsa-miR-185-5p	SEPTIN3
hsa-miR-195-5p	SEPTIN3
hsa-miR-23a-3p	SEPTIN3
hsa-miR-23b-3p	SEPTIN3
hsa-miR-30b-5p	SEPTIN3
hsa-miR-30c-5p	SEPTIN3
hsa-miR-324-5p	SEPTIN3
hsa-miR-425-5p	SEPTIN3
hsa-miR-574-5p	SEPTIN3
hsa-miR-1343-3p	SEPTIN3
hsa-miR-147a	SEPTIN3
hsa-miR-15b-3p	SEPTIN3
hsa-miR-27a-3p	SEPTIN3
hsa-miR-30a-5p	SEPTIN3
hsa-miR-335-5p	SEPTIN4
hsa-let-7b-5p	SEPTIN4
hsa-miR-6805-3p	SEPTIN4
hsa-miR-5691	SEPTIN4
hsa-miR-5706	SEPTIN4
hsa-miR-4782-5p	SEPTIN4
hsa-miR-3194-3p	SEPTIN4
hsa-miR-6839-5p	SEPTIN4
hsa-miR-3621	SEPTIN4
hsa-miR-378j	SEPTIN4
hsa-miR-518c-5p	SEPTIN4
hsa-miR-3937	SEPTIN4
hsa-miR-4733-3p	SEPTIN4
hsa-miR-1911-3p	SEPTIN4
hsa-miR-1-5p	SEPTIN4
hsa-miR-221-5p	SEPTIN4
hsa-miR-2355-3p	SEPTIN4
hsa-miR-3663-5p	SEPTIN4
hsa-miR-4646-3p	SEPTIN4
hsa-miR-676-3p	SEPTIN4
hsa-miR-6815-3p	SEPTIN4
hsa-miR-7152-3p	SEPTIN4
hsa-miR-8073	SEPTIN4
hsa-miR-362-5p	SEPTIN4
hsa-miR-500a-5p	SEPTIN4
hsa-miR-500b-5p	SEPTIN4
hsa-miR-501-5p	SEPTIN4
hsa-miR-1343-3p	SEPTIN4
hsa-miR-103a-3p	SEPTIN4
hsa-miR-107	SEPTIN4
hsa-miR-16-5p	SEPTIN4
hsa-miR-195-5p	SEPTIN4
hsa-miR-29c-3p	SEPTIN4
hsa-miR-4290	SEPTIN5
hsa-miR-4532	SEPTIN5
hsa-miR-5587-3p	SEPTIN5
hsa-miR-1825	SEPTIN5
hsa-miR-371b-3p	SEPTIN5
hsa-miR-149-3p	SEPTIN5
hsa-miR-15a-5p	SEPTIN5
hsa-miR-15b-5p	SEPTIN5
hsa-miR-1976	SEPTIN5
hsa-miR-335-5p	SEPTIN5
hsa-miR-363-5p	SEPTIN5
hsa-miR-424-5p	SEPTIN5
hsa-miR-615-3p	SEPTIN5
hsa-miR-1-3p	SEPTIN5
hsa-miR-1-3p	SEPTIN6
hsa-miR-3178	SEPTIN6
hsa-miR-6077	SEPTIN6
hsa-miR-2277-5p	SEPTIN6
hsa-miR-873-5p	SEPTIN6
hsa-miR-4784	SEPTIN6
hsa-miR-3150b-3p	SEPTIN6
hsa-miR-212-5p	SEPTIN6
hsa-miR-6856-5p	SEPTIN6
hsa-miR-6758-5p	SEPTIN6
hsa-miR-574-5p	SEPTIN6
hsa-miR-4455	SEPTIN6
hsa-miR-3942-3p	SEPTIN6
hsa-miR-6867-5p	SEPTIN6
hsa-miR-4314	SEPTIN6
hsa-miR-6733-5p	SEPTIN6
hsa-miR-6739-5p	SEPTIN6
hsa-miR-3153	SEPTIN6
hsa-miR-4668-5p	SEPTIN6
hsa-miR-6506-5p	SEPTIN6
hsa-miR-619-5p	SEPTIN6
hsa-miR-3192-5p	SEPTIN6
hsa-miR-4646-5p	SEPTIN6
hsa-miR-204-3p	SEPTIN6
hsa-miR-3925-3p	SEPTIN6
hsa-miR-622	SEPTIN6
hsa-miR-508-5p	SEPTIN6
hsa-miR-1306-3p	SEPTIN6
hsa-miR-133a-3p	SEPTIN6
hsa-miR-133b	SEPTIN6
hsa-miR-29b-2-5p	SEPTIN6
hsa-miR-5087	SEPTIN6
hsa-miR-5695	SEPTIN6
hsa-miR-8068	SEPTIN6
hsa-miR-141-5p	SEPTIN6
hsa-miR-182-5p	SEPTIN6
hsa-miR-221-5p	SEPTIN6
hsa-miR-34a-5p	SEPTIN6
hsa-miR-522-5p	SEPTIN6
hsa-miR-766-3p	SEPTIN6
hsa-miR-9-5p	SEPTIN6
hsa-miR-1343-3p	SEPTIN6
hsa-miR-124-3p	SEPTIN6
hsa-miR-147a	SEPTIN6
hsa-miR-155-5p	SEPTIN6
hsa-miR-200c-3p	SEPTIN6
hsa-miR-203a-3p	SEPTIN6
hsa-miR-224-5p	SEPTIN6
hsa-miR-27a-3p	SEPTIN6
hsa-let-7d-5p	SEPTIN6
hsa-miR-30a-5p	SEPTIN7
hsa-miR-429	SEPTIN7
hsa-miR-200a-3p	SEPTIN7
hsa-miR-200c-3p	SEPTIN7
hsa-miR-141-3p	SEPTIN7
hsa-miR-200b-3p	SEPTIN7
hsa-miR-26b-5p	SEPTIN7
hsa-miR-34a-5p	SEPTIN7
hsa-miR-135a-3p	SEPTIN7
hsa-miR-296-3p	SEPTIN7
hsa-miR-127-3p	SEPTIN7
hsa-miR-587	SEPTIN7
hsa-miR-5581-3p	SEPTIN7
hsa-miR-223-5p	SEPTIN7
hsa-miR-4716-5p	SEPTIN7
hsa-miR-511-3p	SEPTIN7
hsa-miR-101-3p	SEPTIN7
hsa-miR-1246	SEPTIN7
hsa-miR-126-5p	SEPTIN7
hsa-miR-16-2-3p	SEPTIN7
hsa-miR-183-3p	SEPTIN7
hsa-miR-19a-3p	SEPTIN7
hsa-miR-19b-3p	SEPTIN7
hsa-miR-217	SEPTIN7
hsa-miR-221-5p	SEPTIN7
hsa-miR-224-5p	SEPTIN7
hsa-miR-29a-5p	SEPTIN7
hsa-miR-30b-5p	SEPTIN7
hsa-miR-30c-5p	SEPTIN7
hsa-miR-30d-5p	SEPTIN7
hsa-miR-30e-5p	SEPTIN7
hsa-miR-486-5p	SEPTIN7
hsa-miR-499a-3p	SEPTIN7
hsa-miR-501-3p	SEPTIN7
hsa-miR-522-5p	SEPTIN7
hsa-miR-556-3p	SEPTIN7
hsa-miR-1-3p	SEPTIN7
hsa-miR-136-3p	SEPTIN7
hsa-miR-149-5p	SEPTIN7
hsa-miR-219a-5p	SEPTIN7
hsa-miR-221-3p	SEPTIN7
hsa-miR-27a-3p	SEPTIN7
hsa-miR-27b-3p	SEPTIN7
hsa-miR-369-3p	SEPTIN7
hsa-miR-377-3p	SEPTIN7
hsa-miR-495-3p	SEPTIN7
hsa-miR-155-5p	SEPTIN7
hsa-miR-16-5p	SEPTIN7
hsa-miR-210-3p	SEPTIN7
hsa-miR-374a-5p	SEPTIN7
hsa-miR-324-5p	SEPTIN8
hsa-miR-3670	SEPTIN8
hsa-miR-5680	SEPTIN8
hsa-miR-200a-3p	SEPTIN8
hsa-miR-141-3p	SEPTIN8
hsa-miR-186-5p	SEPTIN8
hsa-miR-3133	SEPTIN8
hsa-miR-708-3p	SEPTIN8
hsa-miR-6734-5p	SEPTIN8
hsa-miR-1226-5p	SEPTIN8
hsa-miR-6834-5p	SEPTIN8
hsa-miR-151a-3p	SEPTIN8
hsa-miR-939-5p	SEPTIN8
hsa-miR-1343-5p	SEPTIN8
hsa-miR-4448	SEPTIN8
hsa-miR-6738-5p	SEPTIN8
hsa-miR-5194	SEPTIN8
hsa-miR-1914-3p	SEPTIN8
hsa-miR-423-5p	SEPTIN8
hsa-miR-3184-5p	SEPTIN8
hsa-miR-4677-3p	SEPTIN8
hsa-miR-4499	SEPTIN8
hsa-miR-4463	SEPTIN8
hsa-miR-3680-3p	SEPTIN8
hsa-miR-448	SEPTIN8
hsa-miR-663b	SEPTIN8
hsa-miR-608	SEPTIN8
hsa-miR-4651	SEPTIN8
hsa-miR-4745-3p	SEPTIN8
hsa-miR-1538	SEPTIN8
hsa-miR-4707-3p	SEPTIN8
hsa-miR-4755-3p	SEPTIN8
hsa-miR-4258	SEPTIN8
hsa-miR-3976	SEPTIN8
hsa-miR-6782-5p	SEPTIN8
hsa-miR-6856-5p	SEPTIN8
hsa-miR-6758-5p	SEPTIN8
hsa-miR-153-3p	SEPTIN8
hsa-miR-6090	SEPTIN8
hsa-miR-6780a-3p	SEPTIN8
hsa-miR-6881-3p	SEPTIN8
hsa-miR-7111-3p	SEPTIN8
hsa-let-7a-5p	SEPTIN8
hsa-let-7b-5p	SEPTIN8
hsa-let-7c-5p	SEPTIN8
hsa-let-7e-5p	SEPTIN8
hsa-let-7f-5p	SEPTIN8
hsa-let-7g-5p	SEPTIN8
hsa-let-7i-5p	SEPTIN8
hsa-miR-146a-3p	SEPTIN8
hsa-miR-155-5p	SEPTIN8
hsa-miR-17-5p	SEPTIN8
hsa-miR-188-3p	SEPTIN8
hsa-miR-197-3p	SEPTIN8
hsa-miR-22-3p	SEPTIN8
hsa-miR-23b-5p	SEPTIN8
hsa-miR-339-5p	SEPTIN8
hsa-miR-499a-3p	SEPTIN8
hsa-miR-523-3p	SEPTIN8
hsa-miR-532-3p	SEPTIN8
hsa-miR-551b-5p	SEPTIN8
hsa-miR-5581-5p	SEPTIN8
hsa-miR-628-3p	SEPTIN8
hsa-miR-676-3p	SEPTIN8
hsa-miR-744-5p	SEPTIN8
hsa-miR-7-5p	SEPTIN8
hsa-miR-760	SEPTIN8
hsa-miR-93-5p	SEPTIN8
hsa-miR-98-5p	SEPTIN8
hsa-miR-124-3p	SEPTIN8
hsa-miR-128-3p	SEPTIN8
hsa-miR-181a-5p	SEPTIN8
hsa-miR-218-5p	SEPTIN8
hsa-miR-27a-3p	SEPTIN8
hsa-miR-27b-3p	SEPTIN8
hsa-miR-485-3p	SEPTIN8
hsa-miR-1-3p	SEPTIN8
hsa-miR-103a-3p	SEPTIN8
hsa-miR-107	SEPTIN8
hsa-miR-147a	SEPTIN8
hsa-miR-429	SEPTIN8
hsa-miR-374a-5p	SEPTIN8
hsa-miR-124-3p	SEPTIN9
hsa-miR-186-5p	SEPTIN9
hsa-miR-10a-5p	SEPTIN9
hsa-miR-5587-5p	SEPTIN9
hsa-miR-670-5p	SEPTIN9
hsa-miR-6791-5p	SEPTIN9
hsa-miR-4292	SEPTIN9
hsa-miR-4308	SEPTIN9
hsa-miR-216b-3p	SEPTIN9
hsa-miR-4802-3p	SEPTIN9
hsa-miR-603	SEPTIN9
hsa-miR-8485	SEPTIN9
hsa-miR-6500-3p	SEPTIN9
hsa-miR-4717-3p	SEPTIN9
hsa-miR-3614-5p	SEPTIN9
hsa-miR-128-1-5p	SEPTIN9
hsa-miR-128-2-5p	SEPTIN9
hsa-miR-1914-3p	SEPTIN9
hsa-miR-3144-5p	SEPTIN9
hsa-miR-3184-5p	SEPTIN9
hsa-miR-3191-3p	SEPTIN9
hsa-miR-3677-3p	SEPTIN9
hsa-miR-423-5p	SEPTIN9
hsa-miR-4652-5p	SEPTIN9
hsa-miR-4655-3p	SEPTIN9
hsa-miR-4710	SEPTIN9
hsa-miR-491-5p	SEPTIN9
hsa-miR-5194	SEPTIN9
hsa-miR-6734-5p	SEPTIN9
hsa-miR-6738-5p	SEPTIN9
hsa-miR-6781-5p	SEPTIN9
hsa-miR-6795-3p	SEPTIN9
hsa-miR-6804-5p	SEPTIN9
hsa-miR-6810-5p	SEPTIN9
hsa-miR-6826-3p	SEPTIN9
hsa-miR-6882-3p	SEPTIN9
hsa-miR-6887-3p	SEPTIN9
hsa-let-7a-5p	SEPTIN9
hsa-let-7b-5p	SEPTIN9
hsa-let-7c-5p	SEPTIN9
hsa-let-7e-5p	SEPTIN9
hsa-let-7f-5p	SEPTIN9
hsa-let-7g-5p	SEPTIN9
hsa-let-7i-5p	SEPTIN9
hsa-miR-103a-3p	SEPTIN9
hsa-miR-107	SEPTIN9
hsa-miR-1304-3p	SEPTIN9
hsa-miR-1468-5p	SEPTIN9
hsa-miR-16-5p	SEPTIN9
hsa-miR-192-5p	SEPTIN9
hsa-miR-197-3p	SEPTIN9
hsa-miR-210-3p	SEPTIN9
hsa-miR-27a-3p	SEPTIN9
hsa-miR-27b-3p	SEPTIN9
hsa-miR-3157-5p	SEPTIN9
hsa-miR-3605-3p	SEPTIN9
hsa-miR-424-5p	SEPTIN9
hsa-miR-4449	SEPTIN9
hsa-miR-522-5p	SEPTIN9
hsa-miR-641	SEPTIN9
hsa-miR-744-5p	SEPTIN9
hsa-miR-876-5p	SEPTIN9
hsa-miR-98-5p	SEPTIN9
hsa-miR-1-3p	SEPTIN9
hsa-miR-126-3p	SEPTIN9
hsa-miR-146a-5p	SEPTIN9
hsa-miR-192-5p	SEPTIN10
hsa-miR-215-5p	SEPTIN10
hsa-miR-100-5p	SEPTIN10
hsa-miR-103a-2-5p	SEPTIN10
hsa-miR-181c-3p	SEPTIN10
hsa-miR-21-5p	SEPTIN10
hsa-miR-22-5p	SEPTIN10
hsa-miR-23b-5p	SEPTIN10
hsa-miR-26a-5p	SEPTIN10
hsa-miR-26b-5p	SEPTIN10
hsa-miR-27b-5p	SEPTIN10
hsa-miR-320a	SEPTIN10
hsa-miR-502-5p	SEPTIN10
hsa-miR-124-3p	SEPTIN10
hsa-miR-155-5p	SEPTIN10
hsa-miR-16-5p	SEPTIN10
hsa-miR-182-5p	SEPTIN10
hsa-miR-210-3p	SEPTIN10
hsa-miR-376a-5p	SEPTIN10
hsa-miR-7-5p	SEPTIN10
hsa-miR-155-5p	SEPTIN11
hsa-miR-186-5p	SEPTIN11
hsa-miR-101-3p	SEPTIN11
hsa-miR-222-3p	SEPTIN11
hsa-miR-17-5p	SEPTIN11
hsa-let-7a-5p	SEPTIN11
hsa-miR-100-3p	SEPTIN11
hsa-miR-125a-5p	SEPTIN11
hsa-miR-125b-5p	SEPTIN11
hsa-miR-138-5p	SEPTIN11
hsa-miR-139-5p	SEPTIN11
hsa-miR-144-5p	SEPTIN11
hsa-miR-148b-3p	SEPTIN11
hsa-miR-150-5p	SEPTIN11
hsa-miR-181a-5p	SEPTIN11
hsa-miR-18a-5p	SEPTIN11
hsa-miR-18b-5p	SEPTIN11
hsa-miR-197-3p	SEPTIN11
hsa-miR-19a-3p	SEPTIN11
hsa-miR-19b-3p	SEPTIN11
hsa-miR-1-3p	SEPTIN11
hsa-miR-203a-3p	SEPTIN11
hsa-miR-20a-3p	SEPTIN11
hsa-miR-20a-5p	SEPTIN11
hsa-miR-21-5p	SEPTIN11
hsa-miR-218-5p	SEPTIN11
hsa-miR-22-3p	SEPTIN11
hsa-miR-2355-3p	SEPTIN11
hsa-miR-23a-3p	SEPTIN11
hsa-miR-23b-3p	SEPTIN11
hsa-miR-24-2-5p	SEPTIN11
hsa-miR-27a-3p	SEPTIN11
hsa-miR-27b-3p	SEPTIN11
hsa-miR-29a-3p	SEPTIN11
hsa-miR-29a-5p	SEPTIN11
hsa-miR-29b-3p	SEPTIN11
hsa-miR-29c-3p	SEPTIN11
hsa-miR-3174	SEPTIN11
hsa-miR-329-3p	SEPTIN11
hsa-miR-342-3p	SEPTIN11
hsa-miR-361-5p	SEPTIN11
hsa-miR-376a-3p	SEPTIN11
hsa-miR-376b-3p	SEPTIN11
hsa-miR-380-5p	SEPTIN11
hsa-miR-411-5p	SEPTIN11
hsa-miR-423-5p	SEPTIN11
hsa-miR-425-5p	SEPTIN11
hsa-miR-488-5p	SEPTIN11
hsa-miR-497-5p	SEPTIN11
hsa-miR-501-3p	SEPTIN11
hsa-miR-548c-5p	SEPTIN11
hsa-miR-548d-5p	SEPTIN11
hsa-miR-5581-3p	SEPTIN11
hsa-miR-570-3p	SEPTIN11
hsa-miR-590-5p	SEPTIN11
hsa-miR-612	SEPTIN11
hsa-miR-654-3p	SEPTIN11
hsa-miR-7-5p	SEPTIN11
hsa-miR-877-5p	SEPTIN11
hsa-miR-921	SEPTIN11
hsa-miR-96-5p	SEPTIN11
hsa-miR-124-3p	SEPTIN11
hsa-miR-129-2-3p	SEPTIN11
hsa-miR-146a-5p	SEPTIN11
hsa-miR-147a	SEPTIN11
hsa-miR-16-5p	SEPTIN11
hsa-miR-210-3p	SEPTIN11
hsa-miR-330-3p	SEPTIN11
hsa-miR-146a-5p	SEPTIN12
hsa-miR-147a	SEPTIN12
hsa-miR-16-5p	SEPTIN14
hsa-miR-5089-5p	SEPTIN14
hsa-miR-6842-3p	SEPTIN14
hsa-miR-7151-3p	SEPTIN14
hsa-miR-5095	SEPTIN14
hsa-miR-5787	SEPTIN14
hsa-miR-4505	SEPTIN14
hsa-miR-4430	SEPTIN14
hsa-miR-3652	SEPTIN14
hsa-miR-6778-3p	SEPTIN14
hsa-miR-6506-5p	SEPTIN14
hsa-miR-619-5p	SEPTIN14
hsa-miR-6814-5p	SEPTIN14
hsa-miR-150-5p	SEPTIN14
hsa-miR-6504-3p	SEPTIN14
hsa-miR-4465	SEPTIN14
hsa-miR-4279	SEPTIN14
hsa-miR-26b-5p	SEPTIN14
hsa-miR-26a-5p	SEPTIN14
hsa-miR-1297	SEPTIN14
hsa-miR-1976	SEPTIN14
hsa-miR-3653-5p	SEPTIN14
hsa-miR-6747-3p	SEPTIN14
hsa-miR-6727-3p	SEPTIN14
hsa-miR-4722-3p	SEPTIN14
hsa-miR-6784-5p	SEPTIN14
hsa-miR-6513-3p	SEPTIN14
hsa-miR-8062	SEPTIN14
hsa-miR-129-5p	SEPTIN14
hsa-miR-1304-5p	SEPTIN14
hsa-miR-19a-5p	SEPTIN14
hsa-miR-19b-1-5p	SEPTIN14
hsa-miR-19b-2-5p	SEPTIN14
hsa-miR-25-5p	SEPTIN14
hsa-miR-3197	SEPTIN14
hsa-miR-3655	SEPTIN14
hsa-miR-500b-3p	SEPTIN14
hsa-miR-5691	SEPTIN14
hsa-miR-6087	SEPTIN14
hsa-miR-6765-5p	SEPTIN14
hsa-miR-6805-3p	SEPTIN14
hsa-miR-6879-3p	SEPTIN14
hsa-miR-6885-3p	SEPTIN14
hsa-miR-8055	SEPTIN14
hsa-miR-502-3p	SEPTIN14
hsa-miR-522-5p	SEPTIN14
hsa-miR-126-5p	SEPTIN15
hsa-miR-148a-3p	SEPTIN15
hsa-miR-148b-3p	SEPTIN15
hsa-miR-16-5p	SEPTIN15
hsa-miR-185-5p	SEPTIN15
hsa-miR-18a-3p	SEPTIN15
hsa-miR-1910-5p	SEPTIN15
hsa-miR-216b-5p	SEPTIN15
hsa-miR-221-3p	SEPTIN15
hsa-miR-222-3p	SEPTIN15
hsa-miR-28-3p	SEPTIN15
hsa-miR-320a	SEPTIN15
hsa-miR-320b	SEPTIN15
hsa-miR-320c	SEPTIN15
hsa-miR-320d	SEPTIN15
hsa-miR-335-3p	SEPTIN15
hsa-miR-335-5p	SEPTIN15
hsa-miR-33a-5p	SEPTIN15
hsa-miR-33b-5p	SEPTIN15
hsa-miR-455-3p	SEPTIN15
hsa-miR-522-5p	SEPTIN15
hsa-miR-580-3p	SEPTIN15
hsa-miR-618	SEPTIN15
hsa-miR-657	SEPTIN15
hsa-miR-1-3p	SEPTIN15
hsa-miR-124-3p	SEPTIN15
hsa-miR-155-5p	SEPTIN15
hsa-miR-107	SEPTIN15
hsa-miR-10b-5p	SEPTIN15
hsa-miR-20a-5p	SEPTIN15
hsa-miR-19b-3p	SEPTIN15
hsa-miR-145-5p	POU5F1
hsa-miR-26b-5p	DELEC1
hsa-miR-193b-3p	A_32_P19460
hsa-miR-193b-3p	A_32_P19466
hsa-miR-193b-3p	A_32_P222030
hsa-miR-1273g-3p	A1BG
hsa-miR-6736-5p	A1BG
hsa-miR-4701-3p	A1BG
hsa-miR-1262	A1BG
hsa-miR-7703	A1BG
hsa-miR-6720-5p	A1BG
hsa-miR-6512-3p	A1BG
hsa-miR-542-3p	A1BG
hsa-miR-1288-3p	A1BG
hsa-miR-661	A1BG
hsa-miR-4645-3p	A1BG
hsa-miR-6776-5p	A1BG
hsa-miR-4793-3p	A1BG
hsa-miR-4772-3p	A1BG
hsa-miR-766-3p	A1BG
hsa-miR-6742-3p	A1BG
hsa-miR-6849-3p	A1BG
hsa-miR-508-5p	A1BG
hsa-miR-200a-3p	A1BG
hsa-miR-141-3p	A1BG
hsa-miR-5582-5p	A1BG
hsa-miR-124-3p	A1BG
hsa-miR-129-2-3p	A1BG
hsa-miR-146a-5p	A1BG
hsa-miR-4480	A1CF
hsa-miR-93-5p	A1CF
hsa-miR-526b-3p	A1CF
hsa-miR-519d-3p	A1CF
hsa-miR-20b-5p	A1CF
hsa-miR-20a-5p	A1CF
hsa-miR-17-5p	A1CF
hsa-miR-106b-5p	A1CF
hsa-miR-106a-5p	A1CF
hsa-miR-548t-5p	A1CF
hsa-miR-548az-5p	A1CF
hsa-miR-3191-5p	A1CF
hsa-miR-1252-5p	A1CF
hsa-miR-4653-5p	A1CF
hsa-miR-3921	A1CF
hsa-miR-301b-5p	A1CF
hsa-miR-301a-5p	A1CF
hsa-miR-146a-3p	A1CF
hsa-miR-5197-3p	A1CF
hsa-miR-5571-5p	A1CF
hsa-miR-4428	A1CF
hsa-miR-6855-5p	A1CF
hsa-miR-3170	A1CF
hsa-miR-193b-5p	A1CF
hsa-miR-3622b-5p	A1CF
hsa-miR-6778-3p	A1CF
hsa-miR-7155-5p	A1CF
hsa-miR-150-5p	A1CF
hsa-miR-186-3p	A1CF
hsa-miR-1295b-3p	A1CF
hsa-miR-3973	A1CF
hsa-miR-1278	A1CF
hsa-miR-8054	A1CF
hsa-miR-548k	A1CF
hsa-miR-548av-5p	A1CF
hsa-miR-510-3p	A1CF
hsa-miR-1238-3p	A1CF
hsa-miR-670-3p	A1CF
hsa-miR-6881-3p	A1CF
hsa-miR-6780a-3p	A1CF
hsa-miR-7111-3p	A1CF
hsa-miR-6749-3p	A1CF
hsa-miR-211-5p	A1CF
hsa-miR-204-5p	A1CF
hsa-miR-4685-3p	A1CF
hsa-miR-4287	A1CF
hsa-miR-6734-3p	A1CF
hsa-miR-877-3p	A1CF
hsa-miR-5193	A1CF
hsa-miR-6832-3p	A1CF
hsa-miR-5088-3p	A1CF
hsa-miR-548e-5p	A1CF
hsa-miR-6808-3p	A1CF
hsa-miR-6844	A1CF
hsa-miR-6820-3p	A1CF
hsa-miR-3164	A1CF
hsa-miR-3118	A1CF
hsa-miR-134-5p	A1CF
hsa-miR-758-3p	A1CF
hsa-miR-4659b-3p	A1CF
hsa-miR-4659a-3p	A1CF
hsa-miR-4452	A1CF
hsa-miR-183-3p	A1CF
hsa-miR-526b-5p	A1CF
hsa-miR-630	A1CF
hsa-miR-4999-5p	A1CF
hsa-miR-4635	A1CF
hsa-miR-4778-3p	A1CF
hsa-miR-4742-3p	A1CF
hsa-miR-450b-5p	A1CF
hsa-miR-490-3p	A1CF
hsa-miR-5006-3p	A1CF
hsa-miR-1343-3p	A1CF
hsa-miR-34a-5p	A2D
hsa-miR-34a-5p	A2LG
hsa-miR-34a-5p	A2LP
hsa-miR-128-3p	A2M
hsa-miR-122-5p	A2M
hsa-miR-98-5p	A2M
hsa-miR-197-3p	A2M
hsa-miR-579-3p	A2M
hsa-miR-1-3p	A2M
hsa-miR-30a-5p	A2M
hsa-let-7b-5p	A2M
hsa-miR-16-5p	A2M
hsa-miR-374a-5p	A2M
hsa-miR-1304-5p	A2ML1
hsa-miR-6765-5p	A2ML1
hsa-miR-6087	A2ML1
hsa-miR-3197	A2ML1
hsa-miR-4772-3p	A2ML1
hsa-miR-3925-3p	A2ML1
hsa-miR-199b-5p	A2ML1
hsa-miR-199a-5p	A2ML1
hsa-miR-1825	A2ML1
hsa-miR-1306-5p	A2ML1
hsa-miR-1304-3p	A2ML1
hsa-miR-6890-3p	A2ML1
hsa-miR-6787-3p	A2ML1
hsa-miR-6736-3p	A2ML1
hsa-miR-216a-5p	A2ML1
hsa-miR-891a-3p	A2ML1
hsa-miR-5693	A2ML1
hsa-miR-449a	A2ML1
hsa-miR-449b-5p	A2ML1
hsa-miR-34a-5p	A2RP
hsa-miR-193b-3p	A4GALT
hsa-miR-483-3p	A4GALT
hsa-miR-4314	A4GALT
hsa-miR-4279	A4GALT
hsa-miR-7111-3p	A4GALT
hsa-miR-6506-5p	A4GALT
hsa-miR-619-5p	A4GALT
hsa-miR-3192-5p	A4GALT
hsa-miR-4646-5p	A4GALT
hsa-miR-204-3p	A4GALT
hsa-miR-330-5p	A4GALT
hsa-miR-326	A4GALT
hsa-miR-6817-3p	A4GALT
hsa-miR-6845-3p	A4GALT
hsa-miR-6769b-3p	A4GALT
hsa-miR-4723-3p	A4GALT
hsa-miR-3183	A4GALT
hsa-miR-5193	A4GALT
hsa-miR-3685	A4GALT
hsa-miR-1-3p	A4GALT
hsa-miR-1343-3p	A4GALT
hsa-miR-194-5p	A4GALT
hsa-miR-200b-3p	A4GALT
hsa-miR-29c-3p	A4GALT
hsa-miR-520c-3p	A4GALT
hsa-miR-373-3p	A4GALT
hsa-miR-372-3p	A4GALT
hsa-miR-374a-5p	A4GALT
hsa-miR-215-5p	AA598803_RC
hsa-miR-16-5p	AAAS
hsa-miR-1296-5p	AAAS
hsa-miR-193b-3p	AAAS
hsa-miR-28-5p	AAAS
hsa-miR-218-5p	AAAS
hsa-miR-1-3p	AAAS
hsa-miR-155-5p	AAAS
hsa-miR-107	AAAS
hsa-miR-191-5p	AAAS
hsa-miR-195-5p	AAAS
hsa-miR-429	AAAS
hsa-miR-7-5p	AAAS
hsa-miR-122-5p	AACS
hsa-miR-877-3p	AACS
hsa-miR-191-5p	AACS
hsa-miR-675-5p	AACS
hsa-miR-4466	AACS
hsa-miR-4667-3p	AACS
hsa-miR-1470	AACS
hsa-miR-6793-3p	AACS
hsa-miR-589-3p	AACS
hsa-miR-3614-5p	AACS
hsa-miR-224-5p	AACS
hsa-miR-24-3p	AACS
hsa-miR-4685-3p	AACS
hsa-miR-488-3p	AACS
hsa-miR-548n	AACS
hsa-miR-5699-3p	AACS
hsa-miR-876-5p	AACS
hsa-miR-195-5p	AACS
hsa-miR-941	AACS
hsa-miR-489-3p	AADAC
hsa-miR-5585-3p	AADAC
hsa-miR-3163	AADAC
hsa-miR-4668-3p	AADAC
hsa-miR-323a-3p	AADAC
hsa-miR-374b-3p	AADAC
hsa-miR-8062	AADAC
hsa-miR-1179	AADAC
hsa-miR-487b-5p	AADAC
hsa-miR-487a-5p	AADAC
hsa-miR-124-3p	AADAC
hsa-miR-129-2-3p	AADAC
hsa-miR-146a-5p	AADAC
hsa-miR-182-5p	AADAC
hsa-miR-210-3p	AADAC
hsa-miR-29c-3p	AADAC
hsa-miR-34a-5p	AADAC
hsa-miR-186-3p	AADACL3
hsa-miR-185-5p	AADACL3
hsa-miR-7977	AADACL3
hsa-miR-6847-3p	AADACL3
hsa-miR-493-3p	AADACL3
hsa-miR-6736-3p	AADACL3
hsa-miR-4714-3p	AADACL3
hsa-miR-3974	AADACL3
hsa-miR-629-3p	AADACL3
hsa-miR-519e-5p	AADACL3
hsa-miR-515-5p	AADACL3
hsa-miR-375	AADACL3
hsa-miR-340-5p	AADACL4
hsa-miR-103a-3p	AADAT
hsa-miR-16-5p	AADAT
hsa-miR-5690	AADAT
hsa-miR-1343-3p	AADAT
hsa-miR-107	AADAT
hsa-miR-124-3p	AADAT
hsa-miR-195-5p	AADAT
hsa-miR-210-3p	AADAT
hsa-miR-488-3p	AAED1
hsa-miR-5195-3p	AAED1
hsa-miR-145-5p	AAED1
hsa-miR-548ah-5p	AAED1
hsa-miR-3609	AAED1
hsa-miR-372-5p	AAED1
hsa-miR-371a-5p	AAED1
hsa-miR-616-5p	AAED1
hsa-miR-373-5p	AAED1
hsa-miR-371b-5p	AAED1
hsa-miR-3613-3p	AAED1
hsa-miR-665	AAED1
hsa-miR-887-5p	AAED1
hsa-miR-6780a-5p	AAED1
hsa-miR-6779-5p	AAED1
hsa-miR-3689c	AAED1
hsa-miR-3689b-3p	AAED1
hsa-miR-3689a-3p	AAED1
hsa-miR-30b-3p	AAED1
hsa-miR-1273h-5p	AAED1
hsa-miR-6788-5p	AAED1
hsa-miR-30c-2-3p	AAED1
hsa-miR-30c-1-3p	AAED1
hsa-miR-1273e	AAED1
hsa-miR-6799-5p	AAED1
hsa-miR-6883-5p	AAED1
hsa-miR-6785-5p	AAED1
hsa-miR-4728-5p	AAED1
hsa-miR-149-3p	AAED1
hsa-miR-7106-5p	AAED1
hsa-miR-7160-5p	AAED1
hsa-miR-6884-5p	AAED1
hsa-miR-485-5p	AAED1
hsa-miR-1827	AAED1
hsa-miR-219b-3p	AAED1
hsa-miR-4649-3p	AAED1
hsa-miR-5690	AAED1
hsa-miR-4478	AAED1
hsa-miR-4419b	AAED1
hsa-miR-3929	AAED1
hsa-miR-6511a-5p	AAED1
hsa-miR-1910-3p	AAED1
hsa-miR-890	AAED1
hsa-miR-302f	AAED1
hsa-miR-4325	AAED1
hsa-miR-7703	AAED1
hsa-miR-6807-5p	AAED1
hsa-miR-6720-5p	AAED1
hsa-miR-6512-3p	AAED1
hsa-miR-6729-5p	AAED1
hsa-miR-4649-5p	AAED1
hsa-miR-661	AAED1
hsa-miR-5186	AAED1
hsa-miR-4486	AAED1
hsa-miR-766-3p	AAED1
hsa-miR-939-3p	AAED1
hsa-miR-92b-3p	AAED1
hsa-miR-92a-3p	AAED1
hsa-miR-367-3p	AAED1
hsa-miR-363-3p	AAED1
hsa-miR-32-5p	AAED1
hsa-miR-25-3p	AAED1
hsa-miR-508-5p	AAED1
hsa-miR-1273g-3p	AAED1
hsa-miR-1285-3p	AAED1
hsa-miR-196a-3p	AAED1
hsa-miR-3187-5p	AAED1
hsa-miR-3672	AAED1
hsa-miR-4252	AAED1
hsa-miR-4793-3p	AAED1
hsa-miR-4797-5p	AAED1
hsa-miR-5189-5p	AAED1
hsa-miR-5586-3p	AAED1
hsa-miR-5694	AAED1
hsa-miR-612	AAED1
hsa-miR-6808-5p	AAED1
hsa-miR-6849-3p	AAED1
hsa-miR-6860	AAED1
hsa-miR-6864-3p	AAED1
hsa-miR-6893-5p	AAED1
hsa-miR-759	AAED1
hsa-miR-873-3p	AAED1
hsa-miR-940	AAED1
hsa-miR-106a-5p	AAED1
hsa-miR-106b-5p	AAED1
hsa-miR-125a-5p	AAED1
hsa-miR-125b-5p	AAED1
hsa-miR-1267	AAED1
hsa-miR-148b-3p	AAED1
hsa-miR-17-5p	AAED1
hsa-miR-181b-5p	AAED1
hsa-miR-20a-5p	AAED1
hsa-miR-20b-5p	AAED1
hsa-miR-224-5p	AAED1
hsa-miR-23b-3p	AAED1
hsa-miR-3179	AAED1
hsa-miR-330-3p	AAED1
hsa-miR-378a-3p	AAED1
hsa-miR-378c	AAED1
hsa-miR-422a	AAED1
hsa-miR-4513	AAED1
hsa-miR-4745-5p	AAED1
hsa-miR-493-3p	AAED1
hsa-miR-520a-3p	AAED1
hsa-miR-574-5p	AAED1
hsa-miR-935	AAED1
hsa-miR-93-5p	AAED1
hsa-miR-1-3p	AAED1
hsa-let-7b-5p	AAED1
hsa-miR-147a	AAED1
hsa-miR-155-5p	AAED1
hsa-miR-16-5p	AAED1
hsa-miR-191-5p	AAED1
hsa-miR-26a-5p	AAED1
hsa-miR-93-3p	AAGAB
hsa-miR-92a-3p	AAGAB
hsa-miR-7856-5p	AAGAB
hsa-miR-576-5p	AAGAB
hsa-miR-4263	AAGAB
hsa-miR-4477b	AAGAB
hsa-miR-4799-5p	AAGAB
hsa-miR-651-3p	AAGAB
hsa-miR-548ay-3p	AAGAB
hsa-miR-548at-3p	AAGAB
hsa-miR-548as-3p	AAGAB
hsa-miR-129-5p	AAGAB
hsa-miR-3680-3p	AAGAB
hsa-miR-557	AAGAB
hsa-miR-507	AAGAB
hsa-miR-450b-5p	AAGAB
hsa-miR-106a-3p	AAGAB
hsa-miR-3691-3p	AAGAB
hsa-miR-3184-3p	AAGAB
hsa-miR-548t-3p	AAGAB
hsa-miR-548ap-3p	AAGAB
hsa-miR-548aa	AAGAB
hsa-miR-548z	AAGAB
hsa-miR-548h-3p	AAGAB
hsa-miR-548d-3p	AAGAB
hsa-miR-548bb-3p	AAGAB
hsa-miR-548ac	AAGAB
hsa-miR-1323	AAGAB
hsa-miR-1-5p	AAGAB
hsa-miR-548o-3p	AAGAB
hsa-miR-16-5p	AAGAB
hsa-miR-182-5p	AAGAB
hsa-miR-205-5p	AAGAB
hsa-miR-22-3p	AAGAB
hsa-miR-224-5p	AAGAB
hsa-miR-29b-2-5p	AAGAB
hsa-miR-3117-5p	AAGAB
hsa-miR-34a-5p	AAGAB
hsa-miR-7-5p	AAGAB
hsa-miR-96-5p	AAGAB
hsa-miR-1-3p	AAGAB
hsa-miR-101-3p	AAGAB
hsa-miR-520f-3p	AAGAB
hsa-miR-374a-5p	AAGAB
hsa-miR-3663-3p	AAK1
hsa-miR-7848-3p	AAK1
hsa-miR-155-5p	AAK1
hsa-miR-20a-5p	AAK1
hsa-miR-106b-5p	AAK1
hsa-miR-622	AAK1
hsa-miR-148a-5p	AAK1
hsa-miR-3942-3p	AAK1
hsa-miR-5100	AAK1
hsa-miR-26a-2-3p	AAK1
hsa-miR-26a-1-3p	AAK1
hsa-miR-6731-3p	AAK1
hsa-miR-892c-5p	AAK1
hsa-miR-1276	AAK1
hsa-miR-6839-3p	AAK1
hsa-miR-3679-3p	AAK1
hsa-miR-6826-3p	AAK1
hsa-miR-629-5p	AAK1
hsa-miR-4261	AAK1
hsa-miR-875-3p	AAK1
hsa-miR-29a-5p	AAK1
hsa-miR-3920	AAK1
hsa-miR-4308	AAK1
hsa-miR-331-3p	AAK1
hsa-miR-6810-3p	AAK1
hsa-miR-6801-3p	AAK1
hsa-miR-587	AAK1
hsa-miR-145-3p	AAK1
hsa-miR-4698	AAK1
hsa-miR-8063	AAK1
hsa-miR-4272	AAK1
hsa-miR-580-5p	AAK1
hsa-miR-3662	AAK1
hsa-miR-377-3p	AAK1
hsa-miR-216b-3p	AAK1
hsa-miR-362-3p	AAK1
hsa-miR-329-3p	AAK1
hsa-miR-8485	AAK1
hsa-miR-3671	AAK1
hsa-miR-372-5p	AAK1
hsa-miR-888-5p	AAK1
hsa-miR-8070	AAK1
hsa-miR-6759-3p	AAK1
hsa-miR-18a-3p	AAK1
hsa-miR-324-3p	AAK1
hsa-miR-1913	AAK1
hsa-miR-3653-5p	AAK1
hsa-miR-371a-5p	AAK1
hsa-miR-4314	AAK1
hsa-miR-675-5p	AAK1
hsa-miR-4466	AAK1
hsa-miR-6508-3p	AAK1
hsa-miR-4726-5p	AAK1
hsa-miR-4640-5p	AAK1
hsa-miR-24-3p	AAK1
hsa-miR-4284	AAK1
hsa-miR-4746-3p	AAK1
hsa-miR-378g	AAK1
hsa-miR-4486	AAK1
hsa-miR-6860	AAK1
hsa-miR-612	AAK1
hsa-miR-5189-5p	AAK1
hsa-miR-3187-5p	AAK1
hsa-miR-1285-3p	AAK1
hsa-miR-764	AAK1
hsa-miR-500a-5p	AAK1
hsa-miR-2355-5p	AAK1
hsa-miR-6793-3p	AAK1
hsa-miR-889-5p	AAK1
hsa-miR-6131	AAK1
hsa-miR-3663-5p	AAK1
hsa-miR-616-5p	AAK1
hsa-miR-373-5p	AAK1
hsa-miR-371b-5p	AAK1
hsa-miR-6513-3p	AAK1
hsa-miR-6878-3p	AAK1
hsa-miR-378a-5p	AAK1
hsa-miR-6744-3p	AAK1
hsa-miR-4757-5p	AAK1
hsa-miR-6778-3p	AAK1
hsa-miR-212-5p	AAK1
hsa-miR-1224-3p	AAK1
hsa-miR-6813-3p	AAK1
hsa-miR-519d-3p	AAK1
hsa-miR-20b-5p	AAK1
hsa-miR-93-5p	AAK1
hsa-miR-17-5p	AAK1
hsa-miR-3065-5p	AAK1
hsa-miR-3529-3p	AAK1
hsa-miR-3978	AAK1
hsa-miR-497-3p	AAK1
hsa-miR-548aa	AAK1
hsa-miR-548ap-3p	AAK1
hsa-miR-548t-3p	AAK1
hsa-miR-6776-3p	AAK1
hsa-miR-106a-5p	AAK1
hsa-miR-10b-3p	AAK1
hsa-miR-1269b	AAK1
hsa-miR-1277-5p	AAK1
hsa-miR-130a-3p	AAK1
hsa-miR-130b-3p	AAK1
hsa-miR-138-5p	AAK1
hsa-miR-139-5p	AAK1
hsa-miR-140-5p	AAK1
hsa-miR-142-5p	AAK1
hsa-miR-145-5p	AAK1
hsa-miR-146a-5p	AAK1
hsa-miR-146b-5p	AAK1
hsa-miR-151a-5p	AAK1
hsa-miR-16-1-3p	AAK1
hsa-miR-181a-2-3p	AAK1
hsa-miR-183-3p	AAK1
hsa-miR-186-3p	AAK1
hsa-miR-18a-5p	AAK1
hsa-miR-18b-5p	AAK1
hsa-miR-19a-5p	AAK1
hsa-miR-19b-1-5p	AAK1
hsa-miR-2110	AAK1
hsa-miR-2467-5p	AAK1
hsa-miR-26a-5p	AAK1
hsa-miR-26b-5p	AAK1
hsa-miR-27a-5p	AAK1
hsa-miR-29b-2-5p	AAK1
hsa-miR-301a-3p	AAK1
hsa-miR-301b-3p	AAK1
hsa-miR-30a-3p	AAK1
hsa-miR-30c-2-3p	AAK1
hsa-miR-30e-3p	AAK1
hsa-miR-342-5p	AAK1
hsa-miR-34a-5p	AAK1
hsa-miR-361-5p	AAK1
hsa-miR-520a-3p	AAK1
hsa-miR-548a-3p	AAK1
hsa-miR-548ar-3p	AAK1
hsa-miR-548e-3p	AAK1
hsa-miR-548f-3p	AAK1
hsa-miR-556-5p	AAK1
hsa-miR-5582-3p	AAK1
hsa-miR-577	AAK1
hsa-miR-589-5p	AAK1
hsa-miR-618	AAK1
hsa-miR-627-5p	AAK1
hsa-miR-766-5p	AAK1
hsa-miR-769-3p	AAK1
hsa-miR-9-5p	AAK1
hsa-miR-126-5p	AAK1
hsa-miR-149-5p	AAK1
hsa-miR-181a-5p	AAK1
hsa-miR-19a-3p	AAK1
hsa-miR-19b-3p	AAK1
hsa-miR-338-3p	AAK1
hsa-miR-369-3p	AAK1
hsa-miR-376c-3p	AAK1
hsa-miR-147a	AAK1
hsa-miR-191-5p	AAK1
hsa-miR-374a-5p	AAK1
hsa-miR-124-3p	AAMDC
hsa-miR-26b-5p	AAMDC
hsa-miR-1910-5p	AAMDC
hsa-miR-3619-5p	AAMDC
hsa-miR-7-5p	AAMDC
hsa-miR-1-3p	AAMDC
hsa-miR-155-5p	AAMDC
hsa-miR-16-5p	AAMDC
hsa-miR-191-5p	AAMDC
hsa-miR-374a-5p	AAMDC
hsa-miR-24-3p	AAMP
hsa-miR-1226-3p	AAMP
hsa-miR-877-3p	AAMP
hsa-miR-130b-5p	AAMP
hsa-miR-193b-3p	AAMP
hsa-miR-183-5p	AAMP
hsa-let-7i-3p	AAMP
hsa-miR-1254	AAMP
hsa-miR-135b-5p	AAMP
hsa-miR-15a-5p	AAMP
hsa-miR-205-5p	AAMP
hsa-miR-22-3p	AAMP
hsa-miR-30a-3p	AAMP
hsa-miR-30d-3p	AAMP
hsa-miR-30e-3p	AAMP
hsa-miR-338-3p	AAMP
hsa-miR-34a-5p	AAMP
hsa-miR-361-3p	AAMP
hsa-miR-362-3p	AAMP
hsa-miR-3913-5p	AAMP
hsa-miR-449a	AAMP
hsa-miR-4511	AAMP
hsa-miR-501-3p	AAMP
hsa-miR-502-3p	AAMP
hsa-miR-5581-5p	AAMP
hsa-miR-582-3p	AAMP
hsa-miR-588	AAMP
hsa-miR-769-3p	AAMP
hsa-miR-924	AAMP
hsa-miR-92a-1-5p	AAMP
hsa-miR-935	AAMP
hsa-miR-23b-3p	AAMP
hsa-miR-494-3p	AAMP
hsa-miR-103a-3p	AAMP
hsa-miR-147a	AAMP
hsa-miR-203a-3p	AAMP
hsa-miR-210-3p	AAMP
hsa-miR-16-5p	AAMP
hsa-miR-183-5p	AANAT
hsa-miR-26a-5p	AANAT
hsa-miR-423-5p	AAR2
hsa-miR-339-5p	AAR2
hsa-miR-374a-3p	AAR2
hsa-miR-4276	AAR2
hsa-miR-361-5p	AAR2
hsa-miR-664a-5p	AAR2
hsa-miR-4794	AAR2
hsa-miR-5190	AAR2
hsa-miR-5094	AAR2
hsa-miR-3064-5p	AAR2
hsa-miR-6504-5p	AAR2
hsa-miR-149-5p	AAR2
hsa-miR-578	AAR2
hsa-miR-384	AAR2
hsa-miR-3685	AAR2
hsa-miR-6859-3p	AAR2
hsa-miR-6860	AAR2
hsa-miR-612	AAR2
hsa-miR-5189-5p	AAR2
hsa-miR-3187-5p	AAR2
hsa-miR-1285-3p	AAR2
hsa-miR-4330	AAR2
hsa-miR-939-3p	AAR2
hsa-miR-6791-5p	AAR2
hsa-miR-4292	AAR2
hsa-miR-331-3p	AAR2
hsa-miR-6837-5p	AAR2
hsa-miR-4685-5p	AAR2
hsa-miR-7113-5p	AAR2
hsa-miR-6823-5p	AAR2
hsa-miR-4640-3p	AAR2
hsa-miR-1254	AAR2
hsa-miR-125b-1-3p	AAR2
hsa-miR-1270	AAR2
hsa-miR-1277-5p	AAR2
hsa-miR-1288-3p	AAR2
hsa-miR-128-3p	AAR2
hsa-miR-143-3p	AAR2
hsa-miR-150-3p	AAR2
hsa-miR-181a-5p	AAR2
hsa-miR-182-5p	AAR2
hsa-miR-185-3p	AAR2
hsa-miR-185-5p	AAR2
hsa-miR-1910-5p	AAR2
hsa-miR-2277-3p	AAR2
hsa-miR-24-2-5p	AAR2
hsa-miR-28-5p	AAR2
hsa-miR-3065-3p	AAR2
hsa-miR-3199	AAR2
hsa-miR-431-3p	AAR2
hsa-miR-4421	AAR2
hsa-miR-455-3p	AAR2
hsa-miR-4705	AAR2
hsa-miR-513a-5p	AAR2
hsa-miR-548n	AAR2
hsa-miR-564	AAR2
hsa-miR-5680	AAR2
hsa-miR-5690	AAR2
hsa-miR-574-5p	AAR2
hsa-miR-604	AAR2
hsa-miR-605-5p	AAR2
hsa-miR-647	AAR2
hsa-miR-708-5p	AAR2
hsa-miR-744-5p	AAR2
hsa-miR-7-5p	AAR2
hsa-miR-769-3p	AAR2
hsa-miR-1-3p	AAR2
hsa-miR-147a	AAR2
hsa-miR-191-5p	AAR2
hsa-miR-29c-3p	AAR2
hsa-miR-374a-5p	AARD
hsa-miR-124-3p	AARS
hsa-miR-744-5p	AARS
hsa-miR-296-3p	AARS
hsa-miR-766-3p	AARS
hsa-miR-615-3p	AARS
hsa-miR-193b-3p	AARS
hsa-miR-484	AARS
hsa-miR-324-5p	AARS
hsa-miR-331-3p	AARS
hsa-miR-103a-3p	AARS
hsa-miR-107	AARS
hsa-miR-128-3p	AARS
hsa-miR-1290	AARS
hsa-miR-129-2-3p	AARS
hsa-miR-1292-5p	AARS
hsa-miR-135b-5p	AARS
hsa-miR-141-5p	AARS
hsa-miR-143-3p	AARS
hsa-miR-145-5p	AARS
hsa-miR-15a-3p	AARS
[truncated: 760,542+ more rows]

## Sheet: miRNA-lncRNA interactions
miRNA-lncRNA interactions
miRNAs	lncRNAs
AC097452	RP1.78B3
AC234031	RP11.94C24
AL021394	RP11.339A11.2
AL121652	RP11.725D20.1
AL121932	RP11.214L19.1
AL391123	AL133243
FP236240	RP11.471B22
FP236383	RP11.527D7.1
FP671120	RP11.298O21.6
FP671120	RP11.527D7.1
FP671120	RP3.468B3.3
hsa-let-7a-2	CG4053
hsa-let-7a-2	AASDHPPT
hsa-let-7a-2	ABCC10
hsa-let-7a-2	AC005498.3
hsa-let-7a-2	AC006273.5
hsa-let-7a-2	AC006465.3
hsa-let-7a-2	AC006547.13
hsa-let-7a-2	AC007796.1
hsa-let-7a-2	AC009120.6
hsa-let-7a-2	AC009133.12
hsa-let-7a-2	AC009299.3
hsa-let-7a-2	AC018766.6
hsa-let-7a-2	AC020663.1
hsa-let-7a-2	AC025171.1
hsa-let-7a-2	AC034102.1
hsa-let-7a-2	AC068057.2
hsa-let-7a-2	AC074117.10
hsa-let-7a-2	AC084018.1
hsa-let-7a-2	AC091729.9
hsa-let-7a-2	AC098973.1
hsa-let-7a-2	ACADVL
hsa-let-7a-2	ACSF3
hsa-let-7a-2	ACTL6A
hsa-let-7a-2	ACTR3
hsa-let-7a-2	ADAM15
hsa-let-7a-2	ADCY7
hsa-let-7a-2	AFG3L1P
hsa-let-7a-2	aHIF
hsa-let-7a-2	AL133458.1
hsa-let-7a-2	ALG13
hsa-let-7a-2	AMDHD2
hsa-let-7a-2	ANLN
hsa-let-7a-2	AP001053.11
hsa-let-7a-2	AP1G2
hsa-let-7a-2	ARF4
hsa-let-7a-2	ARHGDIA
hsa-let-7a-2	ARID2
hsa-let-7a-2	ARRB2
hsa-let-7a-2	ASCC1
hsa-let-7a-2	ATXN3
hsa-let-7a-2	AUP1
hsa-let-7a-2	BAZ2A
hsa-let-7a-2	BZRAP1-AS1
hsa-let-7a-2	C11orf30
hsa-let-7a-2	C14orf80
hsa-let-7a-2	C15orf40
hsa-let-7a-2	C16orf93
hsa-let-7a-2	C19orf48
hsa-let-7a-2	C19orf55
hsa-let-7a-2	C1orf43
hsa-let-7a-2	C20orf24
hsa-let-7a-2	C22orf29
hsa-let-7a-2	C2CD3
hsa-let-7a-2	C7orf55
hsa-let-7a-2	C9orf37
hsa-let-7a-2	CAND1
hsa-let-7a-2	CASC3
hsa-let-7a-2	CASC7
hsa-let-7a-2	CCNE2
hsa-let-7a-2	CD46
hsa-let-7a-2	CDK2
hsa-let-7a-2	CDKN1A
hsa-let-7a-2	CEP112
hsa-let-7a-2	CLDN11
hsa-let-7a-2	CMTM7
hsa-let-7a-2	COPA
hsa-let-7a-2	COPB1
hsa-let-7a-2	COPE
hsa-let-7a-2	COPG2
hsa-let-7a-2	COQ10B
hsa-let-7a-2	COX10-AS1
hsa-let-7a-2	COX11
hsa-let-7a-2	CS
hsa-let-7a-2	CSNK1D
hsa-let-7a-2	CTB.113P19.4
hsa-let-7a-2	CTD.2196E14.4
hsa-let-7a-2	CTD.2516F10.2
hsa-let-7a-2	CTDSPL2
hsa-let-7a-2	CUL2
hsa-let-7a-2	CYHR1
hsa-let-7a-2	DDX31
hsa-let-7a-2	DERL3
hsa-let-7a-2	DMTF1
hsa-let-7a-2	DOPEY1
hsa-let-7a-2	DPY19L3
hsa-let-7a-2	DYM
hsa-let-7a-2	EAF1-AS1
hsa-let-7a-2	EIF1AXP1
hsa-let-7a-2	EIF4E2
hsa-let-7a-2	EIF4G2
hsa-let-7a-2	ENY2
hsa-let-7a-2	EPC1
hsa-let-7a-2	EPN2
hsa-let-7a-2	ERGIC1
hsa-let-7a-2	ERGIC2
hsa-let-7a-2	ERP29
hsa-let-7a-2	ETFDH
hsa-let-7a-2	EWSR1
hsa-let-7a-2	FAM57A
hsa-let-7a-2	FGD5-AS1
hsa-let-7a-2	FMNL1
hsa-let-7a-2	FNDC3B
hsa-let-7a-2	FNTA
hsa-let-7a-2	Ftx
hsa-let-7a-2	GAA
hsa-let-7a-2	GAS5
hsa-let-7a-2	GCNT2
hsa-let-7a-2	GCSHP3
hsa-let-7a-2	GGA3
hsa-let-7a-2	GMPPA
hsa-let-7a-2	GNPAT
hsa-let-7a-2	GOLGA2B
hsa-let-7a-2	GOLGA7
hsa-let-7a-2	GYG1
hsa-let-7a-2	h19
hsa-let-7a-2	H2AFZ
hsa-let-7a-2	HCG18
hsa-let-7a-2	HEATR3
hsa-let-7a-2	HELB
hsa-let-7a-2	HILPDA
hsa-let-7a-2	HLTF
hsa-let-7a-2	HM13
hsa-let-7a-2	HNRNPC
hsa-let-7a-2	hsa.mir.8072
hsa-let-7a-2	IFNAR2
hsa-let-7a-2	INIP
hsa-let-7a-2	INO80B
hsa-let-7a-2	INTS8
hsa-let-7a-2	ITGB7
hsa-let-7a-2	KAT5
hsa-let-7a-2	KB.431C1.4
hsa-let-7a-2	KCNQ1OT1
hsa-let-7a-2	KIAA0100
hsa-let-7a-2	KIAA1429
hsa-let-7a-2	LAMP1
hsa-let-7a-2	LARP1
hsa-let-7a-2	LETMD1
hsa-let-7a-2	LIN52
hsa-let-7a-2	LINC00294
hsa-let-7a-2	LINC00338
hsa-let-7a-2	LINC00610
hsa-let-7a-2	LINC00649
hsa-let-7a-2	LINC00894
hsa-let-7a-2	LINC00963
hsa-let-7a-2	LINS
hsa-let-7a-2	LLGL2
hsa-let-7a-2	LOC100129550
hsa-let-7a-2	LOC100506710
hsa-let-7a-2	LOC400043
hsa-let-7a-2	LRRC28
hsa-let-7a-2	LRRC41
hsa-let-7a-2	LYPLA1
hsa-let-7a-2	MAL2
hsa-let-7a-2	MALAT1
hsa-let-7a-2	MAP2K4
hsa-let-7a-2	MAP3K1
hsa-let-7a-2	MARS
hsa-let-7a-2	MATR3
hsa-let-7a-2	MBD3
hsa-let-7a-2	MCFD2
hsa-let-7a-2	MDM2
hsa-let-7a-2	MDM4
hsa-let-7a-2	METTL9
hsa-let-7a-2	MGEA5
hsa-let-7a-2	MIR4720
hsa-let-7a-2	MLLT10P1
hsa-let-7a-2	MPHOSPH9
hsa-let-7a-2	MRPL51
hsa-let-7a-2	MTAP
hsa-let-7a-2	MTATP8P1
hsa-let-7a-2	MTF2
hsa-let-7a-2	MTND4P12
hsa-let-7a-2	MT.RNR2
hsa-let-7a-2	MYD88
hsa-let-7a-2	MYLK
hsa-let-7a-2	NARG2
hsa-let-7a-2	NBEAL2
hsa-let-7a-2	NCAPD2
hsa-let-7a-2	NCOA6
hsa-let-7a-2	NCOR2
hsa-let-7a-2	NDST3
hsa-let-7a-2	NDUFAF7
hsa-let-7a-2	NEAT1
hsa-let-7a-2	NFKB2
hsa-let-7a-2	NME4
hsa-let-7a-2	NONHSAG000469
hsa-let-7a-2	NONHSAG000932
hsa-let-7a-2	NONHSAG001563
hsa-let-7a-2	NONHSAG001617
hsa-let-7a-2	NONHSAG003298
hsa-let-7a-2	NONHSAG003372
hsa-let-7a-2	NONHSAG003590
hsa-let-7a-2	NONHSAG003607
hsa-let-7a-2	NONHSAG003862
hsa-let-7a-2	NONHSAG005343
hsa-let-7a-2	NONHSAG006086
hsa-let-7a-2	NONHSAG006912
hsa-let-7a-2	NONHSAG008539
hsa-let-7a-2	NONHSAG008671
hsa-let-7a-2	NONHSAG009102
hsa-let-7a-2	NONHSAG009780
hsa-let-7a-2	NONHSAG010677
hsa-let-7a-2	NONHSAG010982
hsa-let-7a-2	NONHSAG011651
hsa-let-7a-2	NONHSAG012506
hsa-let-7a-2	NONHSAG013145
hsa-let-7a-2	NONHSAG015511
hsa-let-7a-2	NONHSAG015597
hsa-let-7a-2	NONHSAG016640
hsa-let-7a-2	NONHSAG017075
hsa-let-7a-2	NONHSAG017737
hsa-let-7a-2	NONHSAG018213
hsa-let-7a-2	NONHSAG019905
hsa-let-7a-2	NONHSAG022113
hsa-let-7a-2	NONHSAG023021
hsa-let-7a-2	NONHSAG024421
hsa-let-7a-2	NONHSAG025260
hsa-let-7a-2	NONHSAG025370
hsa-let-7a-2	NONHSAG026281
hsa-let-7a-2	NONHSAG027469
hsa-let-7a-2	NONHSAG028469
hsa-let-7a-2	NONHSAG028729
hsa-let-7a-2	NONHSAG029331
hsa-let-7a-2	NONHSAG029773
hsa-let-7a-2	NONHSAG030032
hsa-let-7a-2	NONHSAG030540
hsa-let-7a-2	NONHSAG031030
hsa-let-7a-2	NONHSAG031783
hsa-let-7a-2	NONHSAG032337
hsa-let-7a-2	NONHSAG032397
hsa-let-7a-2	NONHSAG032704
hsa-let-7a-2	NONHSAG034166
hsa-let-7a-2	NONHSAG034919
hsa-let-7a-2	NONHSAG035143
hsa-let-7a-2	NONHSAG035493
hsa-let-7a-2	NONHSAG035866
hsa-let-7a-2	NONHSAG036637
hsa-let-7a-2	NONHSAG036740
hsa-let-7a-2	NONHSAG037018
hsa-let-7a-2	NONHSAG037372
hsa-let-7a-2	NONHSAG037675
hsa-let-7a-2	NONHSAG037979
hsa-let-7a-2	NONHSAG039038
hsa-let-7a-2	NONHSAG039640
hsa-let-7a-2	NONHSAG039954
hsa-let-7a-2	NONHSAG040291
hsa-let-7a-2	NONHSAG041054
hsa-let-7a-2	NONHSAG041718
hsa-let-7a-2	NONHSAG041971
hsa-let-7a-2	NONHSAG041985
hsa-let-7a-2	NONHSAG043429
hsa-let-7a-2	NONHSAG045408
hsa-let-7a-2	NONHSAG047225
hsa-let-7a-2	NONHSAG047246
hsa-let-7a-2	NONHSAG047376
hsa-let-7a-2	NONHSAG047455
hsa-let-7a-2	NONHSAG048074
hsa-let-7a-2	NONHSAG048207
hsa-let-7a-2	NONHSAG048419
hsa-let-7a-2	NONHSAG049094
hsa-let-7a-2	NONHSAG050565
hsa-let-7a-2	NONHSAG050957
hsa-let-7a-2	NONHSAG051180
hsa-let-7a-2	NONHSAG052014
hsa-let-7a-2	NONHSAG052739
hsa-let-7a-2	NONHSAG053180
hsa-let-7a-2	NONHSAG053893
hsa-let-7a-2	NONHSAG053896
hsa-let-7a-2	NONHSAG054781
hsa-let-7a-2	NONHSAG054962
hsa-let-7a-2	NRBP1
hsa-let-7a-2	NREP
hsa-let-7a-2	OIP5-AS1
hsa-let-7a-2	OPA1
hsa-let-7a-2	OXA1L
hsa-let-7a-2	P2RX4
hsa-let-7a-2	PAFAH1B1
hsa-let-7a-2	PAPOLA
hsa-let-7a-2	PBX2
hsa-let-7a-2	PEX19
hsa-let-7a-2	PFKFB2
hsa-let-7a-2	PGAP2
hsa-let-7a-2	PHTF2
hsa-let-7a-2	PIAS1
hsa-let-7a-2	PLD1
hsa-let-7a-2	PLEKHA2
hsa-let-7a-2	PLEKHH1
hsa-let-7a-2	PLK2
hsa-let-7a-2	POLI
hsa-let-7a-2	POLR2H
hsa-let-7a-2	POU2F1
hsa-let-7a-2	PPP1R12C
hsa-let-7a-2	PPP1R18
hsa-let-7a-2	PPP2R5E
hsa-let-7a-2	PPP4C
hsa-let-7a-2	PPP5D1
hsa-let-7a-2	PRR4
hsa-let-7a-2	PTGFRN
hsa-let-7a-2	PTMAP1
hsa-let-7a-2	RAB12
hsa-let-7a-2	RAB3GAP2
hsa-let-7a-2	RABGGTB
hsa-let-7a-2	RALY
hsa-let-7a-2	RASSF8
hsa-let-7a-2	RBM25
hsa-let-7a-2	RBM26-AS1
hsa-let-7a-2	RBM39
hsa-let-7a-2	RC3H1
hsa-let-7a-2	RHOBTB3
hsa-let-7a-2	RHOT1
hsa-let-7a-2	RIOK3
hsa-let-7a-2	RN7SL770P
hsa-let-7a-2	RNASEH2B
hsa-let-7a-2	RNASEK.C17orf49
hsa-let-7a-2	RNF10
hsa-let-7a-2	RNF141
hsa-let-7a-2	RNF216P1
hsa-let-7a-2	RP11.1136J12.1
hsa-let-7a-2	RP11.156E6.1
hsa-let-7a-2	RP11.156G14.5
hsa-let-7a-2	RP11.170L3.8
hsa-let-7a-2	RP11.253E3.3
hsa-let-7a-2	RP11.263K19.4
hsa-let-7a-2	RP11.284N8.3
hsa-let-7a-2	RP11.2B6.3
hsa-let-7a-2	RP11.307C12.11
hsa-let-7a-2	RP11.334C17.5
hsa-let-7a-2	RP11.348J24.2
hsa-let-7a-2	RP11.352E6.2
hsa-let-7a-2	RP11.362K14.5
hsa-let-7a-2	RP11.388M20.7
hsa-let-7a-2	RP11.395B7.7
hsa-let-7a-2	RP11.420A21.1
hsa-let-7a-2	RP11.424G14.1
hsa-let-7a-2	RP11.44F21.5
hsa-let-7a-2	RP11.463C8.5
hsa-let-7a-2	RP11.473I1.10
hsa-let-7a-2	RP11.498C9.15
hsa-let-7a-2	RP11.588K22.2
hsa-let-7a-2	RP11.631N16.2
hsa-let-7a-2	RP11.67A1.2
hsa-let-7a-2	RP11.725D20.1
hsa-let-7a-2	RP11.758M4.4
hsa-let-7a-2	RP11.785H5.1
hsa-let-7a-2	RP11.78O7.2
hsa-let-7a-2	RP11.793H13.3
hsa-let-7a-2	RP11.79D8.2
hsa-let-7a-2	RP1.86D1.5
hsa-let-7a-2	RP3.399L15.1
hsa-let-7a-2	RP5.1033H22.2
hsa-let-7a-2	RP5.1112D6.4
hsa-let-7a-2	RP5.1142A6.9
hsa-let-7a-2	RP6.24A23.7
hsa-let-7a-2	RPL35A
hsa-let-7a-2	RPN1
hsa-let-7a-2	RPP14
hsa-let-7a-2	RPS24
hsa-let-7a-2	RPS6KB2
hsa-let-7a-2	RUFY2
hsa-let-7a-2	SAT2
hsa-let-7a-2	SCAMP3
hsa-let-7a-2	SCARNA10
hsa-let-7a-2	SCML2
hsa-let-7a-2	SEC23B
hsa-let-7a-2	SENP5
hsa-let-7a-2	SGK1
hsa-let-7a-2	SLC16A3
hsa-let-7a-2	SLC25A39
hsa-let-7a-2	SLC2A8
hsa-let-7a-2	SLC35F5
hsa-let-7a-2	SMPD4
hsa-let-7a-2	SNF8
hsa-let-7a-2	SNHG1
hsa-let-7a-2	SNHG12
hsa-let-7a-2	SNHG15
hsa-let-7a-2	SNHG16
hsa-let-7a-2	SNHG3
hsa-let-7a-2	SNHG6
hsa-let-7a-2	SNHG7
hsa-let-7a-2	SNORD3D
hsa-let-7a-2	SNRPC
hsa-let-7a-2	SOD2
hsa-let-7a-2	SOGA2
hsa-let-7a-2	SORBS2
hsa-let-7a-2	SP100
hsa-let-7a-2	SPATA20
hsa-let-7a-2	SPEN
hsa-let-7a-2	SRGAP3
hsa-let-7a-2	SRGN
hsa-let-7a-2	SRRT
hsa-let-7a-2	SSFA2
hsa-let-7a-2	STAG3L5P
hsa-let-7a-2	STARD3NL
hsa-let-7a-2	SUPT4H1
hsa-let-7a-2	TAPT1
hsa-let-7a-2	TCERG1
hsa-let-7a-2	TECR
hsa-let-7a-2	TEX41
hsa-let-7a-2	TFG
hsa-let-7a-2	TFRC
hsa-let-7a-2	TMEM138
hsa-let-7a-2	TMEM143
hsa-let-7a-2	TMEM243
hsa-let-7a-2	TMEM42
hsa-let-7a-2	TMEM67
hsa-let-7a-2	TMX2
hsa-let-7a-2	TP73-AS1
hsa-let-7a-2	TPT1-AS1
hsa-let-7a-2	TPTE2P5
hsa-let-7a-2	TSC2
hsa-let-7a-2	TSIX
hsa-let-7a-2	TTC31
hsa-let-7a-2	TTLL4
hsa-let-7a-2	TUG1
hsa-let-7a-2	UBE2T
hsa-let-7a-2	UBLCP1
hsa-let-7a-2	UBXN8
hsa-let-7a-2	USP16
hsa-let-7a-2	VEPH1
hsa-let-7a-2	VPS8
hsa-let-7a-2	WBP1LP2
hsa-let-7a-2	WDR48
hsa-let-7a-2	WEE1
hsa-let-7a-2	WNK1
hsa-let-7a-2	WRAP73
hsa-let-7a-2	XIST
hsa-let-7a-2	XPO1
hsa-let-7a-2	YTHDF3-AS1
hsa-let-7a-2	ZDHHC18
hsa-let-7a-2	ZDHHC7
hsa-let-7a-2	ZMYM2
hsa-let-7a-2	ZMYM4
hsa-let-7a-2	ZNF117
hsa-let-7a-2	ZNF121
hsa-let-7a-2	ZNF37BP
hsa-let-7a-2	ZNF503-AS2
hsa-let-7a-2	ZNF518A
hsa-let-7a-2	ZNF814
hsa-let-7a-2	ZNF91
hsa-let-7a-2-3p	MALAT1
hsa-let-7a-2-3p	NEAT1
hsa-let-7a-2-3p	PSMA6P1
hsa-let-7a-2-3p	RP1.309I22.2
hsa-let-7a-3p	CASC7
hsa-let-7a-3p	CTC.444N24.11
hsa-let-7a-3p	CTD.2651B20.6
hsa-let-7a-3p	CTD.2651B20.7
hsa-let-7a-3p	HCG11
hsa-let-7a-3p	HCG18
hsa-let-7a-3p	HCP5
hsa-let-7a-3p	HOXA10.HOXA9
hsa-let-7a-3p	LINC00657
hsa-let-7a-3p	LOC100507577
hsa-let-7a-3p	MALAT1
hsa-let-7a-3p	NEAT1
hsa-let-7a-3p	NPHP3.ACAD11
hsa-let-7a-3p	OIP5-AS1
hsa-let-7a-3p	RP11.145M9.4
hsa-let-7a-3p	RP11.159D12.2
hsa-let-7a-3p	RP11.174G6.5
hsa-let-7a-3p	RP11.215G15.5
hsa-let-7a-3p	RP11.227G15.3
hsa-let-7a-3p	RP11.282O18.3
hsa-let-7a-3p	RP1.228P16.1
hsa-let-7a-3p	RP3.400B16.1
hsa-let-7a-3p	RP6.24A23.7
hsa-let-7a-3p	RPL5P18
hsa-let-7a-3p	RPL5P34
hsa-let-7a-3p	SRP9P1
hsa-let-7a-3p	TTC3P1
hsa-let-7a-3p	TUG1
hsa-let-7a-3p	XIST
hsa-let-7a-3p	ZFAS1
hsa-let-7a-5p	AC004593.3
hsa-let-7a-5p	AC005154.6
hsa-let-7a-5p	AC005789.11
hsa-let-7a-5p	AC007246.3
hsa-let-7a-5p	AC008982.2
hsa-let-7a-5p	AC009404.2
hsa-let-7a-5p	AC010761.6
hsa-let-7a-5p	AC025335.1
hsa-let-7a-5p	AC063979.1
hsa-let-7a-5p	AC074117.10
hsa-let-7a-5p	AC084082.3
hsa-let-7a-5p	AC090602.2
hsa-let-7a-5p	AC091729.9
hsa-let-7a-5p	AC093724.2
hsa-let-7a-5p	AC093838.4
hsa-let-7a-5p	AC116366.6
hsa-let-7a-5p	AC124997.1
hsa-let-7a-5p	AC135048.13
hsa-let-7a-5p	ACTBP2
hsa-let-7a-5p	ACTBP7
hsa-let-7a-5p	ACTG1P4
hsa-let-7a-5p	AFG3L1P
hsa-let-7a-5p	AL591704.5
hsa-let-7a-5p	AP001055.6
hsa-let-7a-5p	AP001372.2
hsa-let-7a-5p	APOOP5
hsa-let-7a-5p	ARHGAP22.IT1
hsa-let-7a-5p	ATP5G2P1
hsa-let-7a-5p	ATP6V1G2.DDX39B
hsa-let-7a-5p	BACE1-AS
hsa-let-7a-5p	BRE-AS1
hsa-let-7a-5p	C14orf23
hsa-let-7a-5p	C17orf100
hsa-let-7a-5p	C1orf132
hsa-let-7a-5p	C1QTNF3.AMACR
hsa-let-7a-5p	CASC7
hsa-let-7a-5p	CCAT1
hsa-let-7a-5p	CCDC144CP
hsa-let-7a-5p	CEBPZ-AS1
hsa-let-7a-5p	CEP170P1
hsa-let-7a-5p	CH17.12M21.1
hsa-let-7a-5p	chr22.38_28785274.29006793.1
hsa-let-7a-5p	CLUHP3
hsa-let-7a-5p	CRSP8P
hsa-let-7a-5p	CTB.119C2.1
hsa-let-7a-5p	CTB.131B5.5
hsa-let-7a-5p	CTB.50E14.5
hsa-let-7a-5p	CTB.89H12.4
hsa-let-7a-5p	CTC.273B12.8
hsa-let-7a-5p	CTC.359D24.3
hsa-let-7a-5p	CTC.360J11.4
hsa-let-7a-5p	CTC.471C19.1
hsa-let-7a-5p	CTC.471F3.5
hsa-let-7a-5p	CTD.2085J24.4
hsa-let-7a-5p	CTD.2228K2.7
hsa-let-7a-5p	CTD.2262B20.1
hsa-let-7a-5p	CTD.2368P22.1
hsa-let-7a-5p	CTD.2527I21.9
hsa-let-7a-5p	CTD.2541M15.1
hsa-let-7a-5p	CTD.2561J22.2
hsa-let-7a-5p	CTD.3099C6.9
hsa-let-7a-5p	DANCR
hsa-let-7a-5p	DHRS4-AS1
hsa-let-7a-5p	DLX6-AS1
hsa-let-7a-5p	DNAJC27-AS1
hsa-let-7a-5p	EEF1E1.BLOC1S5
hsa-let-7a-5p	EIF1AXP1
hsa-let-7a-5p	FAM157C
hsa-let-7a-5p	FAM211A-AS1
hsa-let-7a-5p	FAM35DP
hsa-let-7a-5p	FAM91A3P
hsa-let-7a-5p	FAM92A1P1
hsa-let-7a-5p	FGD5-AS1
hsa-let-7a-5p	FLVCR1-AS1
hsa-let-7a-5p	FTLP3
hsa-let-7a-5p	FTX
hsa-let-7a-5p	GAPDHP28
hsa-let-7a-5p	GAPDHP40
hsa-let-7a-5p	GAPDHP44
hsa-let-7a-5p	GAPDHP65
hsa-let-7a-5p	GAPDHP73
hsa-let-7a-5p	GAS5
hsa-let-7a-5p	GJA9.MYCBP
hsa-let-7a-5p	GNAQP1
hsa-let-7a-5p	H19
hsa-let-7a-5p	HEIH
hsa-let-7a-5p	HNRNPH1P3
hsa-let-7a-5p	HOXA10.HOXA9
hsa-let-7a-5p	HTR7P1
hsa-let-7a-5p	IPO5P1
hsa-let-7a-5p	KB.1460A1.5
hsa-let-7a-5p	KCNQ1OT1
hsa-let-7a-5p	LINC00263
hsa-let-7a-5p	LINC00355
hsa-let-7a-5p	LINC00472
hsa-let-7a-5p	LINC00634
hsa-let-7a-5p	LINC00641
hsa-let-7a-5p	LINC00657
hsa-let-7a-5p	LINC00668
hsa-let-7a-5p	LINC00882
hsa-let-7a-5p	LINC00910
hsa-let-7a-5p	LINC00963
hsa-let-7a-5p	LINC00999
hsa-let-7a-5p	LINC01089
hsa-let-7a-5p	LINC01102
hsa-let-7a-5p	LINC01277
hsa-let-7a-5p	LINC01278
hsa-let-7a-5p	LINC01314
hsa-let-7a-5p	LL22NC03.2H8.5
hsa-let-7a-5p	LOC100294145
hsa-let-7a-5p	LOC100506100
hsa-let-7a-5p	LOC100506124
hsa-let-7a-5p	LOC100506281
hsa-let-7a-5p	LOC284023
hsa-let-7a-5p	LRRC37A6P
hsa-let-7a-5p	LRRC75A-AS1
hsa-let-7a-5p	MAGI2-AS3
hsa-let-7a-5p	MALAT1
hsa-let-7a-5p	MCM3AP-AS1
hsa-let-7a-5p	MEG3
hsa-let-7a-5p	MEG8
hsa-let-7a-5p	MGC16275
hsa-let-7a-5p	MIR124.2HG
hsa-let-7a-5p	MIR3916
hsa-let-7a-5p	MIR4453
hsa-let-7a-5p	MIR99AHG
hsa-let-7a-5p	MRPS31P4
hsa-let-7a-5p	MSL3P1
hsa-let-7a-5p	MTATP6P1
hsa-let-7a-5p	MTATP8P1
hsa-let-7a-5p	MTND2P28
hsa-let-7a-5p	MTND4P1
hsa-let-7a-5p	MTND4P12
hsa-let-7a-5p	MTND5P10
hsa-let-7a-5p	MTND5P11
hsa-let-7a-5p	MTND5P12
hsa-let-7a-5p	MTND5P13
hsa-let-7a-5p	MYO15B
hsa-let-7a-5p	NDUFV2P1
hsa-let-7a-5p	NEAT1
hsa-let-7a-5p	NNT-AS1
hsa-let-7a-5p	NPHP3.ACAD11
hsa-let-7a-5p	NUFIP1P
hsa-let-7a-5p	NUTM2A-AS1
hsa-let-7a-5p	NUTM2B-AS1
hsa-let-7a-5p	OIP5-AS1
hsa-let-7a-5p	P2RX5.TAX1BP3
hsa-let-7a-5p	PGDP1
hsa-let-7a-5p	PITPNA-AS1
hsa-let-7a-5p	PKI55
hsa-let-7a-5p	PRSS3P1
hsa-let-7a-5p	PSAT1P3
hsa-let-7a-5p	PVRIG2P
hsa-let-7a-5p	PWAR1
hsa-let-7a-5p	PWARSN
hsa-let-7a-5p	PXN-AS1
hsa-let-7a-5p	RAB4B.EGLN2
hsa-let-7a-5p	RAD51L3.RFFL
hsa-let-7a-5p	RASA4CP
hsa-let-7a-5p	RBMS1P1
hsa-let-7a-5p	REG1P
hsa-let-7a-5p	RFPL1S
hsa-let-7a-5p	RMST
hsa-let-7a-5p	RNASEK.C17orf49
hsa-let-7a-5p	RNF216P1
hsa-let-7a-5p	RP1.101G11.2
hsa-let-7a-5p	RP11.1007O24.2
hsa-let-7a-5p	RP11.1103G16.1
hsa-let-7a-5p	RP11.111M22.4
hsa-let-7a-5p	RP11.121C2.2
hsa-let-7a-5p	RP11.12M9.4
hsa-let-7a-5p	RP11.140H17.2
hsa-let-7a-5p	RP11.156E6.1
hsa-let-7a-5p	RP11.158H5.7
hsa-let-7a-5p	RP11.164J13.1
hsa-let-7a-5p	RP11.175K6.1
hsa-let-7a-5p	RP11.175O19.4
hsa-let-7a-5p	RP11.180P8.1
hsa-let-7a-5p	RP11.196G11.5
hsa-let-7a-5p	RP11.19G24.1
hsa-let-7a-5p	RP11.227G15.3
hsa-let-7a-5p	RP11.228B15.4
hsa-let-7a-5p	RP11.23J9.4
hsa-let-7a-5p	RP11.263K19.4
hsa-let-7a-5p	RP11.264B17.3
hsa-let-7a-5p	RP11.268P4.4
hsa-let-7a-5p	RP11.285G1.14
hsa-let-7a-5p	RP11.286B14.1
hsa-let-7a-5p	RP11.293M10.6
hsa-let-7a-5p	RP11.314C16.1
hsa-let-7a-5p	RP11.321C24.4
hsa-let-7a-5p	RP11.331F4.4
hsa-let-7a-5p	RP11.334C17.5
hsa-let-7a-5p	RP11.33B1.1
hsa-let-7a-5p	RP11.348J24.2
hsa-let-7a-5p	RP11.357H14.17
hsa-let-7a-5p	RP11.372K14.2
hsa-let-7a-5p	RP11.37B2.1
hsa-let-7a-5p	RP11.380B4.3
hsa-let-7a-5p	RP11.389O22.4
hsa-let-7a-5p	RP11.391M1.4
hsa-let-7a-5p	RP11.392E22.3
hsa-let-7a-5p	RP1.142O9.2
hsa-let-7a-5p	RP11.434C1.4
hsa-let-7a-5p	RP11.438B23.2
hsa-let-7a-5p	RP11.439E19.10
hsa-let-7a-5p	RP11.439L18.3
hsa-let-7a-5p	RP11.43F13.1
hsa-let-7a-5p	RP11.44M6.7
hsa-let-7a-5p	RP11.458F8.4
hsa-let-7a-5p	RP11.462P6.1
hsa-let-7a-5p	RP11.469M7.1
hsa-let-7a-5p	RP11.488L18.10
hsa-let-7a-5p	RP11.491F9.8
hsa-let-7a-5p	RP11.526D8.11
hsa-let-7a-5p	RP11.545E17.3
hsa-let-7a-5p	RP11.561N12.5
hsa-let-7a-5p	RP11.57H14.4
hsa-let-7a-5p	RP11.588K22.2
hsa-let-7a-5p	RP11.66B24.4
hsa-let-7a-5p	RP11.712P20.2
hsa-let-7a-5p	RP11.731J8.2
hsa-let-7a-5p	RP11.745I13.1
hsa-let-7a-5p	RP11.747H7.3
hsa-let-7a-5p	RP11.74C1.2
hsa-let-7a-5p	RP11.752G15.3
hsa-let-7a-5p	RP11.75A9.3
hsa-let-7a-5p	RP11.785H5.1
hsa-let-7a-5p	RP1.178F15.5
hsa-let-7a-5p	RP11.78O7.2
hsa-let-7a-5p	RP11.819C21.1
hsa-let-7a-5p	RP11.822E23.8
hsa-let-7a-5p	RP11.824M15.3
hsa-let-7a-5p	RP11.82H13.2
hsa-let-7a-5p	RP11.834C11.4
hsa-let-7a-5p	RP11.923I11.8
hsa-let-7a-5p	RP11.96D1.10
hsa-let-7a-5p	RP1.39G22.7
hsa-let-7a-5p	RP3.329A5.8
hsa-let-7a-5p	RP3.368A4.5
hsa-let-7a-5p	RP3.467N11.2
hsa-let-7a-5p	RP4.561L24.3
hsa-let-7a-5p	RP4.655L22.4
hsa-let-7a-5p	RP4.758J24.5
hsa-let-7a-5p	RP4.773N10.4
hsa-let-7a-5p	RP4.798A10.2
hsa-let-7a-5p	RP5.984P4.6
hsa-let-7a-5p	RPL14P1
hsa-let-7a-5p	RPL3P4
hsa-let-7a-5p	RPL4P4
hsa-let-7a-5p	RPLP0P6
hsa-let-7a-5p	RPPH1
hsa-let-7a-5p	RPS14P3
hsa-let-7a-5p	RPS18P12
hsa-let-7a-5p	RPS19P3
hsa-let-7a-5p	RPS7P1
hsa-let-7a-5p	RPS7P11
hsa-let-7a-5p	SATB1-AS1
hsa-let-7a-5p	SBF1P1
hsa-let-7a-5p	SCARNA10
hsa-let-7a-5p	SF3A3P2
hsa-let-7a-5p	SH3BP5-AS1
hsa-let-7a-5p	SLC26A4-AS1
hsa-let-7a-5p	SMG1P3
hsa-let-7a-5p	SNHG1
hsa-let-7a-5p	SNHG14
hsa-let-7a-5p	SNHG23
hsa-let-7a-5p	SNHG6
hsa-let-7a-5p	SNORA71B
hsa-let-7a-5p	SPCS2P4
hsa-let-7a-5p	SPECC1L.ADORA2A
hsa-let-7a-5p	SRP9P1
hsa-let-7a-5p	ST3GAL5-AS1
hsa-let-7a-5p	STAG3L5P.PVRIG2P.PILRB
hsa-let-7a-5p	STIP1P3
hsa-let-7a-5p	TEKT4P2
hsa-let-7a-5p	TLK1P1
hsa-let-7a-5p	TRAM2-AS1
hsa-let-7a-5p	TRG-AS1
hsa-let-7a-5p	TTN-AS1
hsa-let-7a-5p	TTTY15
hsa-let-7a-5p	TUG1
hsa-let-7a-5p	TXLNGY
hsa-let-7a-5p	U73166.2
hsa-let-7a-5p	UBE2F.SCLY
hsa-let-7a-5p	UBL7-AS1
hsa-let-7a-5p	UG0898H09
hsa-let-7a-5p	UPF3AP1
hsa-let-7a-5p	VDAC1P8
hsa-let-7a-5p	VSTM2A.OT1
hsa-let-7a-5p	VTRNA2.1
hsa-let-7a-5p	XIST
hsa-let-7a-5p	XXbac.B476C20.13
hsa-let-7a-5p	YWHAEP1
hsa-let-7a-5p	ZNF337-AS1
hsa-let-7a-5p	ZNF37BP
hsa-let-7a-5p	ZNF876P
hsa-let-7a-5p	ZNRD1-AS1
hsa-let-7b-3p	AC083843.1
hsa-let-7b-3p	CTA.292E10.9
hsa-let-7b-3p	CTB.89H12.4
hsa-let-7b-3p	CTC.444N24.11
hsa-let-7b-3p	CTD.2554C21.1
hsa-let-7b-3p	CTD.2651B20.6
hsa-let-7b-3p	CTD.2651B20.7
hsa-let-7b-3p	EEF1E1.BLOC1S5
hsa-let-7b-3p	GAS5
hsa-let-7b-3p	HCG11
hsa-let-7b-3p	HOXA10.HOXA9
hsa-let-7b-3p	HSPA9P1
hsa-let-7b-3p	LINC00657
hsa-let-7b-3p	MALAT1
hsa-let-7b-3p	MIR3916
hsa-let-7b-3p	NEAT1
hsa-let-7b-3p	OIP5-AS1
hsa-let-7b-3p	RP11.174G6.5
hsa-let-7b-3p	RP11.227G15.3
hsa-let-7b-3p	RP11.282O18.3
hsa-let-7b-3p	RP11.359E3.4
hsa-let-7b-3p	RP1.228P16.1
hsa-let-7b-3p	RP3.400B16.1
hsa-let-7b-3p	RPL23P8
hsa-let-7b-3p	RPL5P18
hsa-let-7b-3p	RPL5P34
hsa-let-7b-3p	SNHG1
hsa-let-7b-3p	TMX2.CTNND1
hsa-let-7b-3p	ZFAS1
hsa-let-7b-5p	CG4053
hsa-let-7b-5p	AASDHPPT
hsa-let-7b-5p	ABCC10
hsa-let-7b-5p	AC004593.3
hsa-let-7b-5p	AC005154.5
hsa-let-7b-5p	AC005154.6
hsa-let-7b-5p	AC005498.3
hsa-let-7b-5p	AC005789.11
hsa-let-7b-5p	AC006273.5
hsa-let-7b-5p	AC006465.3
hsa-let-7b-5p	AC006547.13
hsa-let-7b-5p	AC007246.3
hsa-let-7b-5p	AC007740.1
hsa-let-7b-5p	AC007796.1
hsa-let-7b-5p	AC008982.2
hsa-let-7b-5p	AC009120.6
hsa-let-7b-5p	AC009133.12
hsa-let-7b-5p	AC009299.3
hsa-let-7b-5p	AC009404.2
hsa-let-7b-5p	AC010761.6
hsa-let-7b-5p	AC016710.1
hsa-let-7b-5p	AC018766.6
hsa-let-7b-5p	AC020663.1
hsa-let-7b-5p	AC025171.1
hsa-let-7b-5p	AC034102.1
hsa-let-7b-5p	AC063979.1
hsa-let-7b-5p	AC068057.2
hsa-let-7b-5p	AC074117.10
hsa-let-7b-5p	AC084018.1
hsa-let-7b-5p	AC084082.3
hsa-let-7b-5p	AC090602.2
hsa-let-7b-5p	AC091729.9
hsa-let-7b-5p	AC093724.2
hsa-let-7b-5p	AC093838.4
hsa-let-7b-5p	AC098973.1
hsa-let-7b-5p	AC116366.6
hsa-let-7b-5p	AC124997.1
hsa-let-7b-5p	AC135048.13
hsa-let-7b-5p	ACADVL
hsa-let-7b-5p	ACSF3
hsa-let-7b-5p	ACTBP2
hsa-let-7b-5p	ACTBP7
hsa-let-7b-5p	ACTG1P4
hsa-let-7b-5p	ACTL6A
hsa-let-7b-5p	ACTR3
hsa-let-7b-5p	ADAM15
hsa-let-7b-5p	ADCY7
hsa-let-7b-5p	ADIPOR2
hsa-let-7b-5p	AFG3L1P
hsa-let-7b-5p	aHIF
hsa-let-7b-5p	AL133458.1
hsa-let-7b-5p	AL591704.5
hsa-let-7b-5p	ALG13
hsa-let-7b-5p	ALG8
hsa-let-7b-5p	ANLN
hsa-let-7b-5p	AP000351.8
hsa-let-7b-5p	AP001053.11
hsa-let-7b-5p	AP001055.6
hsa-let-7b-5p	AP001372.2
hsa-let-7b-5p	AP1G2
hsa-let-7b-5p	APOOP5
hsa-let-7b-5p	ARF4
hsa-let-7b-5p	ARFRP1
hsa-let-7b-5p	ARHGAP22.IT1
hsa-let-7b-5p	ARHGDIA
hsa-let-7b-5p	ARID2
hsa-let-7b-5p	ASPDH
hsa-let-7b-5p	ATP5C1
hsa-let-7b-5p	ATP5G2P1
hsa-let-7b-5p	ATP6V1G2.DDX39B
hsa-let-7b-5p	ATXN3
hsa-let-7b-5p	AUP1
hsa-let-7b-5p	BACE1-AS
hsa-let-7b-5p	BAZ2A
hsa-let-7b-5p	BRE-AS1
hsa-let-7b-5p	C11orf30
hsa-let-7b-5p	C14orf23
hsa-let-7b-5p	C14orf79
hsa-let-7b-5p	C14orf80
hsa-let-7b-5p	C15orf40
hsa-let-7b-5p	C17orf100
hsa-let-7b-5p	C17orf76-AS1
hsa-let-7b-5p	C19orf48
hsa-let-7b-5p	C19orf55
hsa-let-7b-5p	C1orf132
hsa-let-7b-5p	C1orf43
hsa-let-7b-5p	C1QTNF3.AMACR
hsa-let-7b-5p	C20orf24
hsa-let-7b-5p	C22orf29
hsa-let-7b-5p	C2CD3
hsa-let-7b-5p	C7orf55
hsa-let-7b-5p	C9orf37
hsa-let-7b-5p	CA5BP1
hsa-let-7b-5p	CASC3
hsa-let-7b-5p	CASC7
hsa-let-7b-5p	CCAT1
hsa-let-7b-5p	CCDC144CP
hsa-let-7b-5p	CCNE2
hsa-let-7b-5p	CD46
hsa-let-7b-5p	CDCA3
hsa-let-7b-5p	CDK2
hsa-let-7b-5p	CDKN1A
hsa-let-7b-5p	CEBPZ-AS1
hsa-let-7b-5p	CEP112
hsa-let-7b-5p	CEP170P1
hsa-let-7b-5p	CH17.12M21.1
hsa-let-7b-5p	CHMP2B
hsa-let-7b-5p	chr22.38_28785274.29006793.1
hsa-let-7b-5p	CLDN11
hsa-let-7b-5p	CLK3
hsa-let-7b-5p	CLUHP3
hsa-let-7b-5p	CMTM4
hsa-let-7b-5p	CMTM7
hsa-let-7b-5p	COPA
hsa-let-7b-5p	COPB1
hsa-let-7b-5p	COPE
hsa-let-7b-5p	COPG2
hsa-let-7b-5p	COQ10B
hsa-let-7b-5p	COX10-AS1
hsa-let-7b-5p	COX11
hsa-let-7b-5p	CPNE1
hsa-let-7b-5p	CRSP8P
hsa-let-7b-5p	CS
hsa-let-7b-5p	CSNK1D
hsa-let-7b-5p	CTB.113P19.4
hsa-let-7b-5p	CTB.119C2.1
hsa-let-7b-5p	CTB.131B5.5
hsa-let-7b-5p	CTB.43E15.3
hsa-let-7b-5p	CTB.50E14.5
hsa-let-7b-5p	CTB.89H12.4
hsa-let-7b-5p	CTC.273B12.8
hsa-let-7b-5p	CTC.359D24.3
hsa-let-7b-5p	CTC.360J11.4
hsa-let-7b-5p	CTC.471C19.1
hsa-let-7b-5p	CTC.471F3.5
hsa-let-7b-5p	CTD.2085J24.4
hsa-let-7b-5p	CTD.2196E14.4
hsa-let-7b-5p	CTD.2228K2.7
hsa-let-7b-5p	CTD.2262B20.1
hsa-let-7b-5p	CTD.2368P22.1
hsa-let-7b-5p	CTD.2527I21.9
hsa-let-7b-5p	CTD.2541M15.1
hsa-let-7b-5p	CTD.2561J22.2
hsa-let-7b-5p	CTD.2622I13.3
hsa-let-7b-5p	CTD.3099C6.9
hsa-let-7b-5p	CTDSPL2
hsa-let-7b-5p	CUL2
hsa-let-7b-5p	CYHR1
hsa-let-7b-5p	DANCR
hsa-let-7b-5p	DDX31
hsa-let-7b-5p	DENND4B
hsa-let-7b-5p	DERL3
hsa-let-7b-5p	DHRS4-AS1
hsa-let-7b-5p	DLX6-AS1
hsa-let-7b-5p	DMTF1
hsa-let-7b-5p	DNAJC27-AS1
hsa-let-7b-5p	DOPEY1
hsa-let-7b-5p	DPY19L3
hsa-let-7b-5p	DYM
hsa-let-7b-5p	EAF1-AS1
hsa-let-7b-5p	EEF1E1.BLOC1S5
hsa-let-7b-5p	EIF1AXP1
hsa-let-7b-5p	EIF3B
hsa-let-7b-5p	EIF4E2
hsa-let-7b-5p	EIF4G2
hsa-let-7b-5p	EMC4
hsa-let-7b-5p	EMX2OS
hsa-let-7b-5p	ENY2
hsa-let-7b-5p	EPC1
hsa-let-7b-5p	EPN2
hsa-let-7b-5p	ERGIC1
hsa-let-7b-5p	ERGIC2
hsa-let-7b-5p	ERP29
hsa-let-7b-5p	ESYT3
hsa-let-7b-5p	ETFDH
hsa-let-7b-5p	EWSR1
hsa-let-7b-5p	FAM157C
hsa-let-7b-5p	FAM211A-AS1
hsa-let-7b-5p	FAM35DP
hsa-let-7b-5p	FAM57A
hsa-let-7b-5p	FAM91A3P
hsa-let-7b-5p	FAM92A1P1
hsa-let-7b-5p	FASTK
hsa-let-7b-5p	FGD5-AS1
hsa-let-7b-5p	FLVCR1-AS1
hsa-let-7b-5p	FMNL1
hsa-let-7b-5p	FNDC3B
hsa-let-7b-5p	FOXRED1
hsa-let-7b-5p	FTLP3
hsa-let-7b-5p	FTX
hsa-let-7b-5p	Ftx
hsa-let-7b-5p	GAA
hsa-let-7b-5p	GAPDHP28
hsa-let-7b-5p	GAPDHP40
hsa-let-7b-5p	GAPDHP44
hsa-let-7b-5p	GAPDHP65
hsa-let-7b-5p	GAPDHP73
hsa-let-7b-5p	GAS5
hsa-let-7b-5p	GCSHP3
hsa-let-7b-5p	GGA3
hsa-let-7b-5p	GJA9.MYCBP
hsa-let-7b-5p	GLIS3
hsa-let-7b-5p	GMPPA
hsa-let-7b-5p	GNAQP1
hsa-let-7b-5p	GNPAT
hsa-let-7b-5p	GOLGA2B
hsa-let-7b-5p	GOLGA7
hsa-let-7b-5p	GYG1
hsa-let-7b-5p	H19
hsa-let-7b-5p	H2AFZ
hsa-let-7b-5p	HCG18
hsa-let-7b-5p	HEATR3
hsa-let-7b-5p	HEIH
hsa-let-7b-5p	HELB
hsa-let-7b-5p	HLTF
hsa-let-7b-5p	HM13
hsa-let-7b-5p	HMMR
hsa-let-7b-5p	HNRNPH1P3
hsa-let-7b-5p	HOST2
hsa-let-7b-5p	HOTAIR
hsa-let-7b-5p	HOXA10.HOXA9
hsa-let-7b-5p	hsa.mir.8072
hsa-let-7b-5p	HTR7P1
hsa-let-7b-5p	IFRD1
hsa-let-7b-5p	IMMT
hsa-let-7b-5p	INIP
hsa-let-7b-5p	INTS8
hsa-let-7b-5p	IPO5P1
hsa-let-7b-5p	ITGB7
hsa-let-7b-5p	KAT5
hsa-let-7b-5p	KB.1460A1.5
hsa-let-7b-5p	KB.1507C5.2
hsa-let-7b-5p	KB.431C1.4
hsa-let-7b-5p	KCNQ1OT1
hsa-let-7b-5p	KIAA0100
hsa-let-7b-5p	KIAA1429
hsa-let-7b-5p	LAMP1
hsa-let-7b-5p	LARP1
hsa-let-7b-5p	LETMD1
hsa-let-7b-5p	LIG1
hsa-let-7b-5p	LIN52
hsa-let-7b-5p	LINC00263
hsa-let-7b-5p	LINC00294
hsa-let-7b-5p	LINC00338
hsa-let-7b-5p	LINC00355
hsa-let-7b-5p	LINC00472
hsa-let-7b-5p	LINC00610
hsa-let-7b-5p	LINC00634
hsa-let-7b-5p	LINC00641
hsa-let-7b-5p	LINC00657
hsa-let-7b-5p	LINC00668
hsa-let-7b-5p	LINC00882
hsa-let-7b-5p	LINC00894
hsa-let-7b-5p	LINC00910
hsa-let-7b-5p	LINC00963
hsa-let-7b-5p	LINC00999
hsa-let-7b-5p	LINC01089
hsa-let-7b-5p	LINC01102
hsa-let-7b-5p	LINC01277
hsa-let-7b-5p	LINC01278
hsa-let-7b-5p	LINC01314
hsa-let-7b-5p	LINS
hsa-let-7b-5p	LL22NC03.2H8.5
hsa-let-7b-5p	LLGL2
hsa-let-7b-5p	LOC100129550
hsa-let-7b-5p	LOC100294145
hsa-let-7b-5p	LOC100506100
hsa-let-7b-5p	LOC100506124
hsa-let-7b-5p	LOC100506281
hsa-let-7b-5p	LOC100506710
hsa-let-7b-5p	LOC400043
hsa-let-7b-5p	LPCAT4
hsa-let-7b-5p	LRRC28
hsa-let-7b-5p	LRRC37A6P
hsa-let-7b-5p	LRRC41
hsa-let-7b-5p	LRRC75A-AS1
hsa-let-7b-5p	LYPLA1
hsa-let-7b-5p	MAGI2-AS3
hsa-let-7b-5p	MAL2
hsa-let-7b-5p	MALAT1
hsa-let-7b-5p	MAP2K4
hsa-let-7b-5p	MAP3K1
hsa-let-7b-5p	MARS
hsa-let-7b-5p	MATR3
hsa-let-7b-5p	MBD3
hsa-let-7b-5p	MCFD2
hsa-let-7b-5p	MCM3AP-AS1
hsa-let-7b-5p	MDM2
hsa-let-7b-5p	MDM4
hsa-let-7b-5p	MEG3
hsa-let-7b-5p	MEG8
hsa-let-7b-5p	METTL9
hsa-let-7b-5p	MGC16275
hsa-let-7b-5p	MGEA5
hsa-let-7b-5p	MIR124.2HG
hsa-let-7b-5p	MIR3916
hsa-let-7b-5p	MIR4453
hsa-let-7b-5p	MIR4720
hsa-let-7b-5p	MIR99AHG
hsa-let-7b-5p	MIRLET7DHG
hsa-let-7b-5p	MLLT10P1
hsa-let-7b-5p	MPHOSPH9
hsa-let-7b-5p	MRPL51
hsa-let-7b-5p	MRPS31P4
hsa-let-7b-5p	MSL3P1
hsa-let-7b-5p	MTAP
hsa-let-7b-5p	MTATP6P1
hsa-let-7b-5p	MTATP8P1
hsa-let-7b-5p	MTF2
hsa-let-7b-5p	MTND2P28
hsa-let-7b-5p	MTND4P1
hsa-let-7b-5p	MTND4P12
hsa-let-7b-5p	MTND5P10
hsa-let-7b-5p	MTND5P11
hsa-let-7b-5p	MTND5P12
hsa-let-7b-5p	MTND5P13
hsa-let-7b-5p	MT.RNR2
hsa-let-7b-5p	MYD88
hsa-let-7b-5p	MYLK
hsa-let-7b-5p	MYO15B
hsa-let-7b-5p	NBEAL2
hsa-let-7b-5p	NCAPD2
hsa-let-7b-5p	NCOR2
hsa-let-7b-5p	NDST3
hsa-let-7b-5p	NDUFAF7
hsa-let-7b-5p	NDUFV2P1
hsa-let-7b-5p	NEAT1
hsa-let-7b-5p	NFKB2
hsa-let-7b-5p	NME4
hsa-let-7b-5p	NNT-AS1
hsa-let-7b-5p	NONHSAG000469
hsa-let-7b-5p	NONHSAG000932
hsa-let-7b-5p	NONHSAG001563
hsa-let-7b-5p	NONHSAG001617
hsa-let-7b-5p	NONHSAG003372
hsa-let-7b-5p	NONHSAG003590
hsa-let-7b-5p	NONHSAG003607
hsa-let-7b-5p	NONHSAG003862
hsa-let-7b-5p	NONHSAG005343
hsa-let-7b-5p	NONHSAG006086
hsa-let-7b-5p	NONHSAG006912
hsa-let-7b-5p	NONHSAG007371
hsa-let-7b-5p	NONHSAG008539
hsa-let-7b-5p	NONHSAG008671
hsa-let-7b-5p	NONHSAG009749
hsa-let-7b-5p	NONHSAG009780
hsa-let-7b-5p	NONHSAG010677
hsa-let-7b-5p	NONHSAG010982
hsa-let-7b-5p	NONHSAG011651
hsa-let-7b-5p	NONHSAG012506
hsa-let-7b-5p	NONHSAG013145
hsa-let-7b-5p	NONHSAG013514
hsa-let-7b-5p	NONHSAG014373
hsa-let-7b-5p	NONHSAG015511
hsa-let-7b-5p	NONHSAG015597
hsa-let-7b-5p	NONHSAG016640
hsa-let-7b-5p	NONHSAG017425
hsa-let-7b-5p	NONHSAG017737
hsa-let-7b-5p	NONHSAG018213
hsa-let-7b-5p	NONHSAG019905
hsa-let-7b-5p	NONHSAG022113
hsa-let-7b-5p	NONHSAG023021
hsa-let-7b-5p	NONHSAG024421
hsa-let-7b-5p	NONHSAG025260
hsa-let-7b-5p	NONHSAG025370
hsa-let-7b-5p	NONHSAG026281
hsa-let-7b-5p	NONHSAG027469
hsa-let-7b-5p	NONHSAG028469
hsa-let-7b-5p	NONHSAG028729
hsa-let-7b-5p	NONHSAG029331
hsa-let-7b-5p	NONHSAG029773
hsa-let-7b-5p	NONHSAG030540
hsa-let-7b-5p	NONHSAG031030
hsa-let-7b-5p	NONHSAG031783
hsa-let-7b-5p	NONHSAG032315
hsa-let-7b-5p	NONHSAG032337
hsa-let-7b-5p	NONHSAG032397
hsa-let-7b-5p	NONHSAG032704
hsa-let-7b-5p	NONHSAG034166
hsa-let-7b-5p	NONHSAG034512
hsa-let-7b-5p	NONHSAG034919
hsa-let-7b-5p	NONHSAG035197
hsa-let-7b-5p	NONHSAG035493
hsa-let-7b-5p	NONHSAG035866
hsa-let-7b-5p	NONHSAG036637
hsa-let-7b-5p	NONHSAG036740
hsa-let-7b-5p	NONHSAG037018
hsa-let-7b-5p	NONHSAG037372
hsa-let-7b-5p	NONHSAG037979
hsa-let-7b-5p	NONHSAG039640
hsa-let-7b-5p	NONHSAG039954
hsa-let-7b-5p	NONHSAG040291
hsa-let-7b-5p	NONHSAG041028
hsa-let-7b-5p	NONHSAG041054
hsa-let-7b-5p	NONHSAG041718
hsa-let-7b-5p	NONHSAG041971
hsa-let-7b-5p	NONHSAG041985
hsa-let-7b-5p	NONHSAG043429
hsa-let-7b-5p	NONHSAG045408
hsa-let-7b-5p	NONHSAG047246
hsa-let-7b-5p	NONHSAG047376
hsa-let-7b-5p	NONHSAG047455
hsa-let-7b-5p	NONHSAG048074
hsa-let-7b-5p	NONHSAG048207
hsa-let-7b-5p	NONHSAG048419
hsa-let-7b-5p	NONHSAG049298
hsa-let-7b-5p	NONHSAG050565
hsa-let-7b-5p	NONHSAG050957
hsa-let-7b-5p	NONHSAG051180
hsa-let-7b-5p	NONHSAG052014
hsa-let-7b-5p	NONHSAG052739
hsa-let-7b-5p	NONHSAG053180
hsa-let-7b-5p	NONHSAG053893
hsa-let-7b-5p	NONHSAG053896
hsa-let-7b-5p	NONHSAG054781
hsa-let-7b-5p	NPHP3.ACAD11
hsa-let-7b-5p	NRBP1
hsa-let-7b-5p	NREP
hsa-let-7b-5p	NUFIP1P
hsa-let-7b-5p	NUTM2A-AS1
hsa-let-7b-5p	NUTM2B-AS1
hsa-let-7b-5p	OIP5-AS1
hsa-let-7b-5p	OPA1
hsa-let-7b-5p	OXA1L
hsa-let-7b-5p	P2RX4
hsa-let-7b-5p	P2RX5.TAX1BP3
hsa-let-7b-5p	PAFAH1B1
hsa-let-7b-5p	PAFAH1B2
hsa-let-7b-5p	PAPOLA
hsa-let-7b-5p	PBX2
hsa-let-7b-5p	PEX19
hsa-let-7b-5p	PFKFB2
hsa-let-7b-5p	PGAP2
hsa-let-7b-5p	PGDP1
hsa-let-7b-5p	PHB2
hsa-let-7b-5p	PIAS1
hsa-let-7b-5p	PITPNA-AS1
hsa-let-7b-5p	PKI55
hsa-let-7b-5p	PKP4
hsa-let-7b-5p	PLD1
hsa-let-7b-5p	PLEKHA2
hsa-let-7b-5p	PLEKHH1
hsa-let-7b-5p	PLK2
hsa-let-7b-5p	PNISR
hsa-let-7b-5p	POLI
hsa-let-7b-5p	POU2F1
hsa-let-7b-5p	PPP1R12C
hsa-let-7b-5p	PPP1R18
hsa-let-7b-5p	PPP2R5E
hsa-let-7b-5p	PPP4C
hsa-let-7b-5p	PRDX3
hsa-let-7b-5p	PRKAB2
hsa-let-7b-5p	PRR4
hsa-let-7b-5p	PRRC2A
hsa-let-7b-5p	PRSS3P1
hsa-let-7b-5p	PSAT1P3
hsa-let-7b-5p	PTGFRN
hsa-let-7b-5p	PTMAP1
hsa-let-7b-5p	PVRIG2P
hsa-let-7b-5p	PWAR1
hsa-let-7b-5p	PWARSN
hsa-let-7b-5p	PXN-AS1
hsa-let-7b-5p	RAB12
hsa-let-7b-5p	RAB4B.EGLN2
hsa-let-7b-5p	RABGGTB
hsa-let-7b-5p	RAD51L3.RFFL
hsa-let-7b-5p	RALY
hsa-let-7b-5p	RAP1GAP2
hsa-let-7b-5p	RASA4CP
hsa-let-7b-5p	RASSF8
hsa-let-7b-5p	RBM25
hsa-let-7b-5p	RBM26-AS1
hsa-let-7b-5p	RBM39
hsa-let-7b-5p	RBMS1P1
hsa-let-7b-5p	RC3H1
hsa-let-7b-5p	REG1P
hsa-let-7b-5p	RFPL1S
hsa-let-7b-5p	RHOBTB3
hsa-let-7b-5p	RHOT1
hsa-let-7b-5p	RIOK3
hsa-let-7b-5p	RMST
hsa-let-7b-5p	RN7SL770P
hsa-let-7b-5p	RNASEH2B
hsa-let-7b-5p	RNASEK.C17orf49
hsa-let-7b-5p	RNF141
hsa-let-7b-5p	RNF216P1
hsa-let-7b-5p	RP1.101G11.2
hsa-let-7b-5p	RP11.1007O24.2
hsa-let-7b-5p	RP11.1103G16.1
hsa-let-7b-5p	RP11.111M22.4
hsa-let-7b-5p	RP11.1136J12.1
hsa-let-7b-5p	RP11.121C2.2
hsa-let-7b-5p	RP11.12M9.4
hsa-let-7b-5p	RP11.140H17.2
hsa-let-7b-5p	RP11.156E6.1
hsa-let-7b-5p	RP11.156G14.5
hsa-let-7b-5p	RP11.158H5.7
hsa-let-7b-5p	RP11.164J13.1
hsa-let-7b-5p	RP11.170L3.8
hsa-let-7b-5p	RP11.175K6.1
hsa-let-7b-5p	RP11.175O19.4
hsa-let-7b-5p	RP11.180P8.1
hsa-let-7b-5p	RP11.196G11.5
hsa-let-7b-5p	RP11.19G24.1
hsa-let-7b-5p	RP11.227G15.3
hsa-let-7b-5p	RP11.228B15.4
hsa-let-7b-5p	RP11.23J9.4
hsa-let-7b-5p	RP11.253E3.3
hsa-let-7b-5p	RP11.263K19.4
hsa-let-7b-5p	RP11.264B17.3
hsa-let-7b-5p	RP11.268P4.4
hsa-let-7b-5p	RP11.271K21.11
hsa-let-7b-5p	RP11.284N8.3
hsa-let-7b-5p	RP11.285G1.14
hsa-let-7b-5p	RP11.286B14.1
hsa-let-7b-5p	RP11.2B6.3
hsa-let-7b-5p	RP11.307C12.11
hsa-let-7b-5p	RP11.30K9.5
hsa-let-7b-5p	RP11.314C16.1
hsa-let-7b-5p	RP11.321C24.4
hsa-let-7b-5p	RP11.331F4.4
hsa-let-7b-5p	RP11.334C17.5
hsa-let-7b-5p	RP11.33B1.1
hsa-let-7b-5p	RP11.348J24.2
hsa-let-7b-5p	RP11.352E6.2
hsa-let-7b-5p	RP11.357H14.17
hsa-let-7b-5p	RP11.362K14.5
hsa-let-7b-5p	RP11.372K14.2
hsa-let-7b-5p	RP11.37B2.1
hsa-let-7b-5p	RP11.380B4.3
hsa-let-7b-5p	RP11.388M20.7
hsa-let-7b-5p	RP11.389O22.4
hsa-let-7b-5p	RP11.391M1.4
hsa-let-7b-5p	RP11.420A21.1
hsa-let-7b-5p	RP11.424G14.1
hsa-let-7b-5p	RP1.142O9.2
hsa-let-7b-5p	RP11.434C1.4
hsa-let-7b-5p	RP11.438B23.2
hsa-let-7b-5p	RP11.439E19.10
hsa-let-7b-5p	RP11.439L18.3
hsa-let-7b-5p	RP11.43F13.1
hsa-let-7b-5p	RP11.443N24.2
hsa-let-7b-5p	RP11.44F21.5
hsa-let-7b-5p	RP11.44M6.7
hsa-let-7b-5p	RP11.458F8.4
hsa-let-7b-5p	RP11.462P6.1
hsa-let-7b-5p	RP11.463C8.5
hsa-let-7b-5p	RP11.469M7.1
hsa-let-7b-5p	RP11.473I1.10
hsa-let-7b-5p	RP11.488L18.10
hsa-let-7b-5p	RP11.491F9.8
hsa-let-7b-5p	RP11.498C9.15
hsa-let-7b-5p	RP11.526D8.11
hsa-let-7b-5p	RP11.545E17.3
hsa-let-7b-5p	RP11.561N12.5
hsa-let-7b-5p	RP11.57H14.4
hsa-let-7b-5p	RP11.582J16.3
hsa-let-7b-5p	RP11.588K22.2
hsa-let-7b-5p	RP11.631N16.2
hsa-let-7b-5p	RP11.66B24.4
hsa-let-7b-5p	RP11.67A1.2
hsa-let-7b-5p	RP11.712P20.2
hsa-let-7b-5p	RP11.725D20.1
hsa-let-7b-5p	RP11.731J8.2
hsa-let-7b-5p	RP11.745I13.1
hsa-let-7b-5p	RP11.747H7.3
hsa-let-7b-5p	RP11.74C1.2
hsa-let-7b-5p	RP11.752G15.3
hsa-let-7b-5p	RP11.758M4.4
hsa-let-7b-5p	RP11.75A9.3
hsa-let-7b-5p	RP11.785H5.1
hsa-let-7b-5p	RP1.178F15.5
hsa-let-7b-5p	RP11.78O7.2
hsa-let-7b-5p	RP11.793H13.3
hsa-let-7b-5p	RP11.79D8.2
hsa-let-7b-5p	RP11.819C21.1
hsa-let-7b-5p	RP11.822E23.8
hsa-let-7b-5p	RP11.824M15.3
hsa-let-7b-5p	RP11.82H13.2
hsa-let-7b-5p	RP11.834C11.4
hsa-let-7b-5p	RP11.923I11.8
hsa-let-7b-5p	RP11.96D1.10
hsa-let-7b-5p	RP1.39G22.7
hsa-let-7b-5p	RP1.86D1.5
hsa-let-7b-5p	RP3.329A5.8
hsa-let-7b-5p	RP3.368A4.5
hsa-let-7b-5p	RP3.399L15.1
hsa-let-7b-5p	RP3.467N11.2
hsa-let-7b-5p	RP4.561L24.3
hsa-let-7b-5p	RP4.655L22.4
hsa-let-7b-5p	RP4.758J24.5
hsa-let-7b-5p	RP4.773N10.4
hsa-let-7b-5p	RP5.1033H22.2
hsa-let-7b-5p	RP5.1112D6.4
hsa-let-7b-5p	RP5.1142A6.9
hsa-let-7b-5p	RP5.984P4.6
hsa-let-7b-5p	RP6.24A23.7
hsa-let-7b-5p	RPL14P1
hsa-let-7b-5p	RPL35A
hsa-let-7b-5p	RPL3P4
hsa-let-7b-5p	RPL4P4
hsa-let-7b-5p	RPLP0P6
hsa-let-7b-5p	RPP14
hsa-let-7b-5p	RPPH1
hsa-let-7b-5p	RPS14P3
hsa-let-7b-5p	RPS18P12
hsa-let-7b-5p	RPS19P3
hsa-let-7b-5p	RPS24
hsa-let-7b-5p	RPS6KB2
hsa-let-7b-5p	RPS7P1
hsa-let-7b-5p	RPS7P11
hsa-let-7b-5p	RUFY2
hsa-let-7b-5p	SATB1-AS1
hsa-let-7b-5p	SBF1P1
hsa-let-7b-5p	SCAMP3
hsa-let-7b-5p	SCARNA10
hsa-let-7b-5p	SCML2
hsa-let-7b-5p	SEC23B
hsa-let-7b-5p	SENP5
hsa-let-7b-5p	SERTAD3
hsa-let-7b-5p	SF3A1
hsa-let-7b-5p	SF3A3P2
hsa-let-7b-5p	SGK1
hsa-let-7b-5p	SH3BP5-AS1
hsa-let-7b-5p	SH3GLB2
hsa-let-7b-5p	SLC16A3
hsa-let-7b-5p	SLC26A4-AS1
hsa-let-7b-5p	SLC2A8
hsa-let-7b-5p	SLC35F5
hsa-let-7b-5p	SLC37A3
hsa-let-7b-5p	SLFN11
hsa-let-7b-5p	SMG1P3
hsa-let-7b-5p	SMPD4
hsa-let-7b-5p	SNF8
hsa-let-7b-5p	SNHG1
hsa-let-7b-5p	SNHG12
hsa-let-7b-5p	SNHG14
hsa-let-7b-5p	SNHG15
hsa-let-7b-5p	SNHG16
hsa-let-7b-5p	SNHG23
hsa-let-7b-5p	SNHG3
hsa-let-7b-5p	SNHG6
hsa-let-7b-5p	SNHG7
hsa-let-7b-5p	SNORA71B
hsa-let-7b-5p	SNORD3D
hsa-let-7b-5p	SNRPC
hsa-let-7b-5p	SOD2
hsa-let-7b-5p	SOGA2
hsa-let-7b-5p	SORBS2
hsa-let-7b-5p	SP100
hsa-let-7b-5p	SPATA20
hsa-let-7b-5p	SPCS2P4
hsa-let-7b-5p	SPECC1L.ADORA2A
hsa-let-7b-5p	SPEN
hsa-let-7b-5p	SRGAP3
hsa-let-7b-5p	SRP9P1
hsa-let-7b-5p	SRRT
hsa-let-7b-5p	SSFA2
hsa-let-7b-5p	ST3GAL5-AS1
hsa-let-7b-5p	ST6GALNAC2
hsa-let-7b-5p	STAG3L5P
hsa-let-7b-5p	STAG3L5P.PVRIG2P.PILRB
hsa-let-7b-5p	STARD3NL
hsa-let-7b-5p	STIP1P3
hsa-let-7b-5p	SUPT4H1
hsa-let-7b-5p	TAPT1
hsa-let-7b-5p	TATDN2P2
hsa-let-7b-5p	TECR
hsa-let-7b-5p	TEKT4P2
hsa-let-7b-5p	TELO2
hsa-let-7b-5p	TEX41
hsa-let-7b-5p	TFRC
hsa-let-7b-5p	TINF2
hsa-let-7b-5p	TLK1P1
hsa-let-7b-5p	TM2D1
hsa-let-7b-5p	TMEM138
hsa-let-7b-5p	TMEM143
hsa-let-7b-5p	TMEM167A
hsa-let-7b-5p	TMEM243
hsa-let-7b-5p	TMEM42
hsa-let-7b-5p	TMEM67
hsa-let-7b-5p	TMX2
hsa-let-7b-5p	TNFRSF1A
hsa-let-7b-5p	TP73-AS1
hsa-let-7b-5p	TPT1-AS1
hsa-let-7b-5p	TPTE2P5
hsa-let-7b-5p	TRAM2-AS1
hsa-let-7b-5p	TRG-AS1
hsa-let-7b-5p	TSC2
hsa-let-7b-5p	TSIX
hsa-let-7b-5p	TTC31
hsa-let-7b-5p	TTLL4
hsa-let-7b-5p	TTN-AS1
hsa-let-7b-5p	TTTY15
hsa-let-7b-5p	TUG1
hsa-let-7b-5p	TXLNG2P
hsa-let-7b-5p	TXLNGY
hsa-let-7b-5p	U73166.2
hsa-let-7b-5p	UBE2D3
hsa-let-7b-5p	UBE2F.SCLY
hsa-let-7b-5p	UBE2T
hsa-let-7b-5p	UBE2V1
hsa-let-7b-5p	UBL7-AS1
hsa-let-7b-5p	UBLCP1
hsa-let-7b-5p	UBXN8
hsa-let-7b-5p	UG0898H09
hsa-let-7b-5p	UPF3AP1
hsa-let-7b-5p	USP16
hsa-let-7b-5p	VDAC1P8
hsa-let-7b-5p	VEPH1
hsa-let-7b-5p	VPS8
hsa-let-7b-5p	VSTM2A.OT1
hsa-let-7b-5p	VTRNA2.1
hsa-let-7b-5p	WBP1LP2
hsa-let-7b-5p	WDR48
hsa-let-7b-5p	WEE1
hsa-let-7b-5p	WNK1
hsa-let-7b-5p	WRAP73
hsa-let-7b-5p	XIST
hsa-let-7b-5p	XPO1
hsa-let-7b-5p	XXbac.B476C20.13
hsa-let-7b-5p	YAF2
hsa-let-7b-5p	YTHDF3-AS1
hsa-let-7b-5p	YWHAEP1
hsa-let-7b-5p	ZDHHC18
hsa-let-7b-5p	ZMYM2
hsa-let-7b-5p	ZMYM4
hsa-let-7b-5p	ZNF117
hsa-let-7b-5p	ZNF121
hsa-let-7b-5p	ZNF337-AS1
hsa-let-7b-5p	ZNF37BP
hsa-let-7b-5p	ZNF503-AS2
hsa-let-7b-5p	ZNF518A
hsa-let-7b-5p	ZNF587
hsa-let-7b-5p	ZNF814
hsa-let-7b-5p	ZNF876P
hsa-let-7b-5p	ZNF91
hsa-let-7b-5p	ZNRD1-AS1
hsa-let-7b-5p	ZYX
hsa-let-7c	CG4053
hsa-let-7c	AASDHPPT
hsa-let-7c	ABCC10
hsa-let-7c	AC005498.3
hsa-let-7c	AC006273.5
hsa-let-7c	AC006465.3
hsa-let-7c	AC006547.13
hsa-let-7c	AC007796.1
hsa-let-7c	AC009120.6
hsa-let-7c	AC009133.12
hsa-let-7c	AC009299.3
hsa-let-7c	AC018766.6
hsa-let-7c	AC020663.1
hsa-let-7c	AC025171.1
hsa-let-7c	AC034102.1
hsa-let-7c	AC068057.2
hsa-let-7c	AC074117.10
hsa-let-7c	AC084018.1
hsa-let-7c	AC091729.9
hsa-let-7c	AC098973.1
hsa-let-7c	ACADVL
hsa-let-7c	ACSF3
hsa-let-7c	ACTL6A
hsa-let-7c	ADAM15
hsa-let-7c	ADCY7
hsa-let-7c	AFG3L1P
hsa-let-7c	aHIF
hsa-let-7c	AL133458.1
hsa-let-7c	ALG13
hsa-let-7c	ALG8
hsa-let-7c	ANLN
hsa-let-7c	AP001053.11
hsa-let-7c	AP1G2
hsa-let-7c	ARF4
hsa-let-7c	ARHGDIA
hsa-let-7c	ARID2
hsa-let-7c	ASCC1
hsa-let-7c	ASPDH
hsa-let-7c	ATXN3
hsa-let-7c	AUP1
hsa-let-7c	BAZ2A
hsa-let-7c	BZRAP1-AS1
hsa-let-7c	C11orf30
hsa-let-7c	C14orf79
hsa-let-7c	C14orf80
hsa-let-7c	C15orf40
hsa-let-7c	C16orf93
hsa-let-7c	C17orf76-AS1
hsa-let-7c	C19orf48
hsa-let-7c	C19orf55
hsa-let-7c	C1orf35
hsa-let-7c	C1orf43
hsa-let-7c	C20orf24
hsa-let-7c	C22orf29
hsa-let-7c	C2CD3
hsa-let-7c	C7orf55
hsa-let-7c	C9orf37
hsa-let-7c	CAND1
hsa-let-7c	CASC7
hsa-let-7c	CCNE2
hsa-let-7c	CD46
hsa-let-7c	CDCA3
hsa-let-7c	CDK2
hsa-let-7c	CDKN1A
hsa-let-7c	CEP112
hsa-let-7c	CHMP2B
hsa-let-7c	CLDN11
hsa-let-7c	COPB1
hsa-let-7c	COPE
hsa-let-7c	COPG2
hsa-let-7c	COQ10B
hsa-let-7c	CORO7
hsa-let-7c	COX10-AS1
hsa-let-7c	COX11
hsa-let-7c	CS
hsa-let-7c	CSNK1D
hsa-let-7c	CTB.113P19.4
hsa-let-7c	CTB.43E15.3
hsa-let-7c	CTD.2047H16.4
hsa-let-7c	CTD.2196E14.4
hsa-let-7c	CTD.2516F10.2
hsa-let-7c	CTD.2622I13.3
hsa-let-7c	CTDSPL2
hsa-let-7c	CUL2
hsa-let-7c	CYHR1
hsa-let-7c	DDX31
hsa-let-7c	DENND4B
hsa-let-7c	DERL3
hsa-let-7c	DMTF1
hsa-let-7c	DOPEY1
hsa-let-7c	DPY19L3
hsa-let-7c	DYM
hsa-let-7c	EAF1-AS1
hsa-let-7c	EIF1AXP1
hsa-let-7c	EIF4E2
hsa-let-7c	EIF4G2
hsa-let-7c	EMC4
hsa-let-7c	EMX2OS
hsa-let-7c	ENY2
hsa-let-7c	EPC1
hsa-let-7c	EPN2
hsa-let-7c	ERGIC1
hsa-let-7c	ERGIC2
hsa-let-7c	ERP29
hsa-let-7c	ETFDH
hsa-let-7c	EWSR1
hsa-let-7c	FAM57A
hsa-let-7c	FGD5-AS1
hsa-let-7c	FMNL1
hsa-let-7c	FNDC3B
hsa-let-7c	Ftx
hsa-let-7c	GAA
hsa-let-7c	GAS5
hsa-let-7c	GCSHP3
hsa-let-7c	GGA3
hsa-let-7c	GLIS3
hsa-let-7c	GMPPA
hsa-let-7c	GNPAT
hsa-let-7c	GOLGA2B
hsa-let-7c	GOLGA7
hsa-let-7c	GYG1
hsa-let-7c	h19
hsa-let-7c	H2AFZ
hsa-let-7c	HCG18
hsa-let-7c	HEATR3
hsa-let-7c	HELB
hsa-let-7c	HLTF
hsa-let-7c	HM13
hsa-let-7c	hsa.mir.8072
hsa-let-7c	IFNAR2
hsa-let-7c	INIP
hsa-let-7c	INTS8
hsa-let-7c	ITGB7
hsa-let-7c	KAT5
hsa-let-7c	KB.1507C5.2
hsa-let-7c	KB.431C1.4
hsa-let-7c	KCNQ1OT1
hsa-let-7c	KIAA0100
hsa-let-7c	KIAA1429
hsa-let-7c	LAMP1
hsa-let-7c	LARP1
hsa-let-7c	LETMD1
hsa-let-7c	LIN52
hsa-let-7c	LINC00294
hsa-let-7c	LINC00338
hsa-let-7c	LINC00610
hsa-let-7c	LINC00649
hsa-let-7c	LINC00665
hsa-let-7c	LINC00894
hsa-let-7c	LINC00963
hsa-let-7c	LINS
hsa-let-7c	LLGL2
hsa-let-7c	LOC100129550
hsa-let-7c	LOC100506710
hsa-let-7c	LOC400043
hsa-let-7c	LPCAT4
hsa-let-7c	LRRC28
hsa-let-7c	LRRC41
hsa-let-7c	LYPLA1
hsa-let-7c	MAL2
hsa-let-7c	MALAT1
hsa-let-7c	MAP2K4
hsa-let-7c	MAP3K1
hsa-let-7c	MARS
hsa-let-7c	MATR3
hsa-let-7c	MBD3
hsa-let-7c	MCFD2
hsa-let-7c	MDM2
hsa-let-7c	MDM4
hsa-let-7c	METTL9
hsa-let-7c	MGEA5
hsa-let-7c	MIR4720
hsa-let-7c	MLLT10P1
hsa-let-7c	MPHOSPH9
hsa-let-7c	MTAP
hsa-let-7c	MTATP8P1
hsa-let-7c	MTF2
hsa-let-7c	MTND4P12
hsa-let-7c	MT.RNR2
hsa-let-7c	MYD88
hsa-let-7c	MYLK
hsa-let-7c	NARG2
hsa-let-7c	NBEAL2
hsa-let-7c	NCAPD2
hsa-let-7c	NCOR2
hsa-let-7c	NDST3
hsa-let-7c	NDUFAF7
hsa-let-7c	NEAT1
hsa-let-7c	NFKB2
hsa-let-7c	NME4
hsa-let-7c	NONHSAG000469
hsa-let-7c	NONHSAG000932
hsa-let-7c	NONHSAG001563
hsa-let-7c	NONHSAG001617
hsa-let-7c	NONHSAG003372
hsa-let-7c	NONHSAG003590
hsa-let-7c	NONHSAG003607
hsa-let-7c	NONHSAG003862
hsa-let-7c	NONHSAG005343
hsa-let-7c	NONHSAG006086
hsa-let-7c	NONHSAG006912
hsa-let-7c	NONHSAG008539
hsa-let-7c	NONHSAG008671
hsa-let-7c	NONHSAG009780
hsa-let-7c	NONHSAG010677
hsa-let-7c	NONHSAG010982
hsa-let-7c	NONHSAG011293
hsa-let-7c	NONHSAG011651
hsa-let-7c	NONHSAG012506
hsa-let-7c	NONHSAG013145
hsa-let-7c	NONHSAG013514
hsa-let-7c	NONHSAG014373
hsa-let-7c	NONHSAG015511
hsa-let-7c	NONHSAG015597
hsa-let-7c	NONHSAG016640
hsa-let-7c	NONHSAG017737
hsa-let-7c	NONHSAG018213
hsa-let-7c	NONHSAG019905
hsa-let-7c	NONHSAG022113
hsa-let-7c	NONHSAG023021
hsa-let-7c	NONHSAG024421
hsa-let-7c	NONHSAG025260
hsa-let-7c	NONHSAG025370
hsa-let-7c	NONHSAG026281
hsa-let-7c	NONHSAG027469
hsa-let-7c	NONHSAG028469
hsa-let-7c	NONHSAG028729
hsa-let-7c	NONHSAG029331
hsa-let-7c	NONHSAG029773
hsa-let-7c	NONHSAG030032
hsa-let-7c	NONHSAG030540
hsa-let-7c	NONHSAG031030
hsa-let-7c	NONHSAG031783
hsa-let-7c	NONHSAG032337
hsa-let-7c	NONHSAG032397
hsa-let-7c	NONHSAG032704
hsa-let-7c	NONHSAG034166
hsa-let-7c	NONHSAG034919
hsa-let-7c	NONHSAG035143
hsa-let-7c	NONHSAG035493
hsa-let-7c	NONHSAG035866
hsa-let-7c	NONHSAG036637
hsa-let-7c	NONHSAG036740
hsa-let-7c	NONHSAG037018
hsa-let-7c	NONHSAG037372
hsa-let-7c	NONHSAG037675
hsa-let-7c	NONHSAG037979
hsa-let-7c	NONHSAG039640
hsa-let-7c	NONHSAG039954
hsa-let-7c	NONHSAG040291
hsa-let-7c	NONHSAG041054
hsa-let-7c	NONHSAG041718
hsa-let-7c	NONHSAG041971
hsa-let-7c	NONHSAG041985
hsa-let-7c	NONHSAG043429
hsa-let-7c	NONHSAG045408
hsa-let-7c	NONHSAG047246
hsa-let-7c	NONHSAG047376
hsa-let-7c	NONHSAG047455
hsa-let-7c	NONHSAG048074
hsa-let-7c	NONHSAG048207
hsa-let-7c	NONHSAG048419
hsa-let-7c	NONHSAG050565
hsa-let-7c	NONHSAG050957
hsa-let-7c	NONHSAG051180
hsa-let-7c	NONHSAG052014
hsa-let-7c	NONHSAG052739
hsa-let-7c	NONHSAG053180
hsa-let-7c	NONHSAG053893
hsa-let-7c	NONHSAG053896
hsa-let-7c	NONHSAG054781
hsa-let-7c	NRBP1
hsa-let-7c	NREP
hsa-let-7c	OIP5-AS1
hsa-let-7c	OPA1
hsa-let-7c	OXA1L
hsa-let-7c	P2RX4
hsa-let-7c	PAFAH1B1
hsa-let-7c	PAPOLA
hsa-let-7c	PBX2
hsa-let-7c	PEX19
hsa-let-7c	PFKFB2
hsa-let-7c	PGAP2
hsa-let-7c	PHB2
hsa-let-7c	PIAS1
hsa-let-7c	PLEKHA2
hsa-let-7c	PLEKHH1
hsa-let-7c	PLK2
hsa-let-7c	PNISR
hsa-let-7c	POLI
hsa-let-7c	POU2F1
hsa-let-7c	PPP1R12C
hsa-let-7c	PPP1R18
hsa-let-7c	PPP2R5E
hsa-let-7c	PPP4C
hsa-let-7c	PPP5D1
hsa-let-7c	PRR4
hsa-let-7c	PTGFRN
hsa-let-7c	PTMAP1
hsa-let-7c	RAB10
hsa-let-7c	RAB12
hsa-let-7c	RABGGTB
hsa-let-7c	RALY
hsa-let-7c	RASSF8
hsa-let-7c	RBM25
hsa-let-7c	RBM26-AS1
hsa-let-7c	RBM39
hsa-let-7c	RC3H1
hsa-let-7c	RHOBTB3
hsa-let-7c	RHOT1
hsa-let-7c	RIOK3
hsa-let-7c	RN7SL770P
hsa-let-7c	RNASEH2B
hsa-let-7c	RNASEK.C17orf49
hsa-let-7c	RNF141
hsa-let-7c	RNF216P1
hsa-let-7c	RP11.1136J12.1
hsa-let-7c	RP11.156E6.1
hsa-let-7c	RP11.156G14.5
hsa-let-7c	RP11.170L3.8
hsa-let-7c	RP11.253E3.3
hsa-let-7c	RP11.263K19.4
hsa-let-7c	RP11.271K21.11
hsa-let-7c	RP11.284N8.3
hsa-let-7c	RP11.2B6.3
hsa-let-7c	RP11.307C12.11
hsa-let-7c	RP11.30K9.5
hsa-let-7c	RP11.334C17.5
hsa-let-7c	RP11.348J24.2
hsa-let-7c	RP11.352E6.2
hsa-let-7c	RP11.362K14.5
hsa-let-7c	RP11.388M20.7
hsa-let-7c	RP11.420A21.1
hsa-let-7c	RP11.424G14.1
hsa-let-7c	RP11.443N24.2
hsa-let-7c	RP11.44F21.5
hsa-let-7c	RP11.463C8.5
hsa-let-7c	RP11.473I1.10
hsa-let-7c	RP11.498C9.15
hsa-let-7c	RP11.582J16.3
hsa-let-7c	RP11.588K22.2
hsa-let-7c	RP11.631N16.2
hsa-let-7c	RP11.67A1.2
hsa-let-7c	RP11.725D20.1
hsa-let-7c	RP11.758M4.4
hsa-let-7c	RP11.785H5.1
hsa-let-7c	RP11.78O7.2
hsa-let-7c	RP11.793H13.3
hsa-let-7c	RP11.79D8.2
hsa-let-7c	RP1.86D1.5
hsa-let-7c	RP3.399L15.1
hsa-let-7c	RP5.1033H22.2
hsa-let-7c	RP5.1112D6.4
hsa-let-7c	RP5.1142A6.9
hsa-let-7c	RP6.24A23.7
hsa-let-7c	RPL35A
hsa-let-7c	RPP14
hsa-let-7c	RPS24
hsa-let-7c	RPS6KB2
hsa-let-7c	RUFY2
hsa-let-7c	SCAMP3
hsa-let-7c	SCARNA10
hsa-let-7c	SCML2
hsa-let-7c	SEC23B
hsa-let-7c	SENP5
hsa-let-7c	SGK1
hsa-let-7c	SH3GLB2
hsa-let-7c	SLC16A3
hsa-let-7c	SLC25A39
hsa-let-7c	SLC2A8
hsa-let-7c	SLC35F5
hsa-let-7c	SMIM7
hsa-let-7c	SMPD4
hsa-let-7c	SNF8
hsa-let-7c	SNHG1
hsa-let-7c	SNHG12
hsa-let-7c	SNHG15
hsa-let-7c	SNHG16
hsa-let-7c	SNHG3
hsa-let-7c	SNHG6
hsa-let-7c	SNHG7
hsa-let-7c	SNORD3D
hsa-let-7c	SNRPC
hsa-let-7c	SOD2
hsa-let-7c	SOGA2
hsa-let-7c	SORBS2
hsa-let-7c	SP100
hsa-let-7c	SPATA20
hsa-let-7c	SPEN
hsa-let-7c	SRGAP3
hsa-let-7c	SRRT
hsa-let-7c	SSFA2
hsa-let-7c	STAG3L5P
hsa-let-7c	STARD3NL
hsa-let-7c	SUPT4H1
hsa-let-7c	TAPT1
hsa-let-7c	TEX41
hsa-let-7c	TFRC
hsa-let-7c	TINF2
hsa-let-7c	TM2D1
hsa-let-7c	TMEM138
hsa-let-7c	TMEM143
hsa-let-7c	TMEM167A
hsa-let-7c	TMEM243
hsa-let-7c	TMEM42
hsa-let-7c	TMEM44-AS1
hsa-let-7c	TMEM67
hsa-let-7c	TMX2
hsa-let-7c	TP73-AS1
hsa-let-7c	TPT1-AS1
hsa-let-7c	TPTE2P5
hsa-let-7c	TSC2
hsa-let-7c	TSIX
hsa-let-7c	TTC31
hsa-let-7c	TTLL4
hsa-let-7c	TUG1
hsa-let-7c	U73166.2
hsa-let-7c	UBE2D3
hsa-let-7c	UBLCP1
hsa-let-7c	UBXN8
hsa-let-7c	USP16
hsa-let-7c	VEPH1
hsa-let-7c	VPS8
hsa-let-7c	WAC
hsa-let-7c	WBP1LP2
hsa-let-7c	WDR48
hsa-let-7c	WEE1
hsa-let-7c	WNK1
hsa-let-7c	WRAP73
hsa-let-7c	XIST
hsa-let-7c	XPO1
hsa-let-7c	YTHDF3-AS1
hsa-let-7c	ZDHHC18
hsa-let-7c	ZDHHC7
hsa-let-7c	ZMYM2
hsa-let-7c	ZMYM4
hsa-let-7c	ZNF117
hsa-let-7c	ZNF121
hsa-let-7c	ZNF37BP
hsa-let-7c	ZNF503-AS2
hsa-let-7c	ZNF518A
hsa-let-7c	ZNF587
hsa-let-7c	ZNF814
hsa-let-7c	ZNF91
hsa-let-7c-5p	AC091729.9
hsa-let-7c-5p	AFG3L1P
hsa-let-7c-5p	CASC7
hsa-let-7c-5p	CTB.119C2.1
[truncated: 136,953 more rows]

## Sheet: ASD-related miRNAs
ASD-related miRNAs
hsa-miR-92a-1
hsa-miR-92a-2
hsa-miR-95
hsa-miR-106a
hsa-miR-129-1
hsa-miR-7-1
hsa-miR-7-2
hsa-miR-7-3
hsa-miR-181b-1
hsa-miR-129-2
hsa-miR-106b
hsa-miR-181d
hsa-miR-550a-1
hsa-miR-550a-2
hsa-miR-598
hsa-miR-15a-5p
hsa-miR-17-5p
hsa-miR-18a-5p
hsa-miR-19a-3p
hsa-miR-20a-5p
hsa-miR-21-5p
hsa-miR-23a-3p
hsa-miR-27a-3p
hsa-miR-93-5p
hsa-miR-129-5p
hsa-miR-7-5p
hsa-miR-212-3p
hsa-miR-15b-5p
hsa-miR-23b-3p
hsa-miR-128-3p
hsa-miR-132-3p
hsa-miR-140-5p
hsa-miR-146a-5p
hsa-miR-206
hsa-miR-320a
hsa-miR-363-3p
hsa-miR-381-3p
hsa-miR-148b-3p
hsa-miR-133b
hsa-miR-431-5p
hsa-miR-484
hsa-miR-486-5p
hsa-miR-146b-5p
hsa-miR-432-5p
hsa-miR-193b-3p
hsa-miR-539-5p
hsa-miR-652-3p
hsa-miR-663a
hsa-miR-19b-1-5p
hsa-miR-92a-1-5p
hsa-miR-550a-5p
hsa-let-7b
hsa-let-7c
hsa-let-7d
hsa-let-7a-5p
hsa-miR-16-5p
hsa-miR-19b-3p
hsa-miR-24-3p
hsa-miR-29a-3p
hsa-miR-30a-5p
hsa-miR-31-5p
hsa-miR-101-3p
hsa-miR-29b-3p
hsa-miR-199a-5p
hsa-miR-148a-3p
hsa-miR-10b-5p
hsa-miR-34a-5p
hsa-miR-181a-5p
hsa-miR-182-5p
hsa-miR-183-5p
hsa-miR-203a-3p
hsa-miR-210-3p
hsa-miR-218-5p
hsa-miR-221-3p
hsa-miR-222-3p
hsa-miR-223-3p
hsa-miR-200b-3p
hsa-miR-1-3p
hsa-miR-124-3p
hsa-miR-125b-5p
hsa-miR-142-5p
hsa-miR-142-3p
hsa-miR-143-3p
hsa-miR-145-5p
hsa-miR-9-5p
hsa-miR-126-3p
hsa-miR-195-5p
hsa-miR-200c-3p
hsa-miR-155-5p
hsa-miR-29c-3p
hsa-miR-200a-3p
hsa-miR-34c-5p
hsa-miR-524-5p
hsa-miR-520d-5p
hsa-miR-548c-3p
hsa-miR-34b-3p
hsa-miR-3163
hsa-miR-203b-5p
hsa-miR-203b-3p
hsa-miR-210-5p
hsa-miR-203a-5p
hsa-miR-26a-5p
hsa-miR-92a-3p
hsa-miR-196a-5p
hsa-miR-122-5p
hsa-miR-133a-3p
hsa-miR-137
hsa-miR-363
hsa-miR-486
hsa-miR-181b
hsa-miR-103a
hsa-miR-34b
hsa-miR-132
hsa-miR-146a
hsa-miR-146b
hsa-miR-23a
hsa-miR-23b
hsa-miR-4436b-1
hsa-miR-4436b-2
hsa-miR-181
hsa-miR-21
hsa-miR-182
hsa-miR-212
hsa-miR-140
hsa-miR-199a
hsa-miR-92a
hsa-miR-93
hsa-miR-184
hsa-miR-148b
hsa-miR-15a
hsa-miR-15b
hsa-miR-193b
hsa-miR-27a
hsa-miR-381
hsa-miR-431
hsa-miR-432
hsa-miR-539
hsa-miR-652
hsa-miR-221
hsa-miR-219
hsa-miR-29b

## Sheet: ASD-related lncRNAs
ASD-related lncRNAs
AC091891.2
AIRN
anti-NOS2A
ATP6V1G2-DDX39B
ATXN8OS
B1 SINE RNA
B2 SINE RNA
BACE1-AS
BCAR4
BCYRN1
BDNF-AS1
BOK-AS1
BPESC1
BX118339
C15orf2
C1QTNF9B-AS1
CASC2
CBR3-AS1
CDKN2B-AS1
CECR3
CECR9
CHL1-AS2
CRNDE
DAOA-AS1
DAPK1
DGCR5
DISC2
DLEU1
DLEU2
DLG2-AS1
DLX6-AS1
DMPK
DNM3OS
DSCAM-AS1
EPB41L4A-AS1
ESRG
FMR1-AS1
GAS5
GDNF-AS1
GNAS-AS1
H19
HAR1A
HAR1B
HCP5
HIF1A-AS1
HLA-AS1
HOTAIR
HTT-AS
HULC
HYMAI
IFNG-AS1
IGF2-AS
IPW
KCNQ1DN
KCNQ1OT1
LDMAR
LINC00032
LINC00271
LINC00312
LINC00538
LINC00901
MALAT1
MAP3K14
MEG3
MESTIT1
MIAT
MIR100HG
MIR155HG
MIR17HG
MIR31HG
MKRN3-AS1
MSNP1AS
MYCNOS
NAMA
NDM29
NEAT1
NRON
PCA3
PCAT1
PCGEM1
PDZRN3-AS1
PICSAR
PINC
PINK1-AS
PISRT1
PPP3CB
PRINS
PSORS1C3
PTCSC1
PVT1
RMST
RN7SK
RN7SL1
RRP1B
SCAANT1
SNHG11
SNHG3
SNHG4
SNHG5
SOX2-OT
SPRY4-IT1
SRA1
TCL6
TDRG1
TERC
TRAF3IP2-AS1
TUG1
TUSC7
Ube3a-as
uc021oqb.2
uc061gkt.1
UCA1
WRAP53
WT1-AS
XIST
ZFAS1
ZFAT-AS1

## Sheet: ASD-related mRNAs
ASD-related mRNAs
ARSD
BDNF
CTSL
GABRB3
MECP2
MTHFR
NOS1
NOS2
OXTR
AANAT
ABAT
ACACA
ACTB
ACTC1
ACTN4
ADA
ADAM10
ADCYAP1R1
ADORA2A
ADRA1A
ADRA2B
ADRA2C
ADRB2
AFP
ACAN
AGRP
AHR
AIF1
AKT1
ALDH1A1
ALDH1A3
AMT
AMY1A
AMY1B
AMY1C
ANGPT1
ANK2
ANK3
APBA2
APC
APCS
APOC1
APOD
APOE
APP
AR
ARNTL
ARSA
STS
ASMT
ASNS
RERE
ATP2B2
KIF1A
AVP
AVPR1A
BAG1
BCL2
OPN1SW
BMP1
BMP4
DST
BRCA1
BRS3
BST1
BUB1
TSPO
CA2
CACNA1A
CACNA1B
CACNA1C
CACNA1D
CACNB2
CAD
CALB2
CAMK4
CAMK2A
CAPG
CARS1
CASP1
CASP7
CAT
CD5L
CD38
CD40
CD69
CD79A
CDH2
CDH8
CDH9
CDH10
CDH11
CDH13
CDX2
CTSC
CHAT
CHD2
CHD4
CHM
CHRNA3
CHRNA4
CHRNA7
CHRNB2
CIRBP
CNTF
COL4A1
COL9A3
COMP
COMT
CORD1
COX8A
CPB2
CPOX
CREB1
CREBBP
CRH
CRK
CRP
CS
MAPK14
CSF2
NKX2-5
CTNNB1
CTNND2
CUX1
CX3CR1
CYBB
CYP1A2
CYP1B1
CYP2C19
CYP2D6
CYP2E1
CYP11A1
CYP11B1
CYP11B2
CYP19A1
CYP27A1
DAB1
DAO
BRINP1
DBI
DDIT3
DDT
DECR1
DHCR7
DHCR24
DIO2
DIO3
DLG4
DLX1
DLX2
DLX5
DLX6
DMD
DNASE1
DNMT1
DNMT3A
DNMT3B
DPP4
DPP6
DPYD
DPYSL3
DRD1
DRD2
DRD3
DRD4
DRD5
DTNA
DYRK1A
EDNRA
EEF1A2
EGF
EGFR
EIF4E
EIF4EBP2
ELAVL2
ELK3
MARK2
EN2
ENO2
EPHA5
EPHB2
EPHX2
CLN8
EPS8
ERBB4
ERCC2
ESR1
ESR2
EXT1
EYA1
EZH2
F2R
FAAH
FABP1
FABP3
FABP5
FABP7
FAP
FGA
FGF2
FGFR2
FH
FKBP5
FOXG1
FOXF1
FOXC1
FOXE3
FMR1
AFF2
FOLR1
FOLR2
FRA7A
MTOR
FRAXE
FYN
XRCC6
GABPA
GABRA4
GABRA5
GABRG1
GAD1
GAD2
GATA4
OPN1MW
GDI1
GDNF
GEM
GFAP
GLO1
GLRA2
GLUL
GPR37
GPR42
GRIA1
GRIA2
GRIK2
GRIK4
GRIN1
GRIN2A
GRIN2B
NR3C1
GRM1
GRM2
GRM5
GRM7
GRM8
GRP
GRPR
GSK3B
GSR
GSTA1
GSTM1
GSTM5
GSTP1
GSTT1
GTF2I
GZMB
H1-4
HAGH
HFE
HGF
NRG1
UBE2K
HLA-A
HLA-B
HLA-C
HLA-DPA1
HLA-DPB1
HLA-DRB1
HLA-G
HMGB1
HMGN1
NR4A1
HNRNPU
HOXA1
HOXB1
HOXB8
HOXD@
HOXD11
HP
HRAS
AGFG1
HES1
HSPA1A
HSPA1B
HSPA4
HTC2
HTR1A
HTR1B
HTR2A
HTR2C
HTR7
ICA1
IDS
IFNA1
IFNA13
IFNG
IGF1
IGF2
IGFBP5
IL1A
IL1B
IL1RAP
IL1RN
IL2
IL4
IL5
IL6
IL7
CXCL8
IL9
IL10
IL13
IL15
IL16
IL17A
IL18
INS
INSR
IRF1
IRS1
ITGB3
ITPR1
ITPR3
JAK2
JARID2
KCNJ2
KCNJ10
KCNMA1
KCNQ2
KIR2DS1
KIR3DL1
KLRC2
KNG1
KRT7
L1CAM
LAMB1
LDHB
LEP
LGALS7
LIG4
FADS1
LMNA
LNPEP
LRP1
LRP2
LTA
SH2D1A
LYZ
CAPRIN1
MAOA
MAOB
MAPT
MARK1
MBNL1
MDK
MEF2A
MEF2C
MEFV
MET
MIF
MIP
MKI67
MLF1
NR3C2
MME
MMP3
MMP9
MNT
MOG
MRC1
MSN
MSNP1
MSX1
MSX2
COX2
MTNR1A
MTNR1B
MTRR
MUSK
MYH6
MYH10
NCAM1
NCAM2
NDUFS1
NDUFV1
NEO1
NF1
NFE2L2
NFIB
NFKB1
NGF
NGFR
NOTCH1
NPY
NPPA
NRCAM
NTRK1
NTS
NTSR1
NR4A2
OGG1
OPRK1
OPRM1
OTX1
OXT
P2RX7
PAFAH1B1
PAH
PAK2
PAM
PRKN
PAX3
PAX6
PCDH9
SERPINA5
PCYT1A
PDZK1
PER1
PEX7
PF4
CFP
ABCB1
PHB
PIK3CA
PIK3CB
PIK3CD
PIK3CG
PITX2
PITX3
PKD2
PLAUR
PLG
SEPTIN5
POMC
PON1
POR
POU3F2
PPARA
PPARG
PPL
PPP2R5D
PRKCB
MAPK1
MAPK3
MAPK7
MAP2K1
PRL
PRLR
PRODH
RELN
PSD
PSEN2
PSMD12
PTEN
CDK8
NONO
POLR2A
ACADL
AGTR2
ATP1A3
CHD1
AP2M1
CLCN4
COL11A1
DDX3X
DLG3
DNM1
EXT2
ACSL4
BPTF
FGF12
GABRD
GABRG2
GNAO1
GNAQ
HCFC1
HTT
HIVEP2
HNMT
HNRNPH2
NDST1
KCNA1
MEIS2
NDP
NEUROD2
PAK3
PIGC
POLA1
POU3F3
PPP2CA
PPP2R1A
MAPK10
AARS1
ABCA3
ABO
ACADSB
ASIC2
ACHE
ACP1
ADARB1
ADCY1
ADM
ADSL
AGER
AGT
ALB
ALDH2
AMPD1
ANK1
APRT
AQP4
AREG
ARVCF
ASL
ASTN1
ATD
ATP6V1A
ATRX
AVPR2
ADGRB3
TNFRSF17
BMPR2
BRCA2
BTD
C4B
C5
DAGLA
CALB1
CALCA
CAMK2G
CAST
CASP3
SERPINH1
CBS
CD40LG
CDH7
CDH15
CDK5
CECR
CHRM3
CHRNA1
CLK2
CLTC
CNR2
COL4A2
COL6A1
CP
CTLA4
CTSB
CTSD
CYP21A2
DAB2
DBH
ACE
DDC
DHFR
DLD
DNASE1L3
DYNC1H1
DNTT
DPYSL2
DSCAM
EBF1
EGR2
ELN
EP300
ERG
F2RL1
FBN1
FER
FGF14
FGFR1
FLG
FLT4
FOLH1
FOSL2
FRAXA
GABBR1
GABRA1
GABRA2
GABRA3
GABRB1
GABRB2
GABRG3
GAMT
GATM
GCG
GH1
GHR
GJA1
GJA5
GJA8
GJB2
GLDC
GLP1R
GLRB
GLS
GMDS
GOT2
GP1BB
GPR35
GPX1
GRID2
GRIK1
GRIN2D
GUCY1A2
GUK1
H2AZ1
HCCS
HDLBP
HLA-DOA
HPD
HTN1
HTR1D
HTR3A
HTR4
HTR5A
TNC
IGFBP3
INPP1
ITGA6
ITGA4
ITGAV
ITIH3
KCNA2
KCNB1
KCND2
KCNJ1
LAMC2
LASP1
LEPR
LHX1
LIMK1
LMX1B
MAFD2
MAP2
MBD1
MBP
MCC
MEST
MFAP1
MFGE8
KMT2A
MOV10
MT1A
MT3
COX1
COX3
MTF1
MTHFD1
ND1
ND4
ND5
ND6
MTR
TRNF
TRNH
TRNL1
TRNQ
TRNS1
TRNS2
TRNW
MYO1D
NAGA
NAGLU
NDN
NDUFA5
NEDD4
NELL1
NEUROG1
NFIC
NFKBIL1
NHS
NPAS2
NPTX2
NPY1R
NPY5R
NRAS
NTF3
NTF4
NTRK2
NUP98
OCRL
OMG
OPHN1
OTX2
PCSK6
SERPINE1
CNTN3
PC
PDE4A
PDE4B
PDE4D
PECAM1
PENK
PIGH
PITX1
PKP2
PLA2G4A
PLP1
POLG
PPARD
PPP3CA
PRF1
PRKAR1A
C2
DDR1
CHRNA5
CLCN3
CYP2D7
ETF1
F2
FHIT
GALNT1
GRM3
HLA-DMA
HLA-DMB
HLA-DQA1
HLA-DQA2
HLA-DQB1
HLA-DRB2
HLA-DRB3
HLA-DRB5
HLA-DRB6
HLA-DRB9
STT3A
KLC1
MMP16
MSH5
NOTCH4
NRGN
FURIN
PBX2
PRKG1
PSMB9
ABCA10
ABCA13
ABCA7
ACTL6B
ACY1
ADCY3
ADCY5
ADK
ADNP
ADORA3
AGAP1
AGAP2
ADSS2
AGBL4
AGMO
AGO1
AGO3
AGO4
AHDC1
AHI1
AKAP9
ALDH5A1
ANKRD11
ANKS1B
ANXA1
AP1S2
APBB1
APH1A
ARHGAP11B
ARHGAP32
ARHGAP5
ARHGEF10
ARHGEF9
ARID1B
ARID2
ARNT2
ARX
ASAP2
ASB14
ASH1L
ASPM
ASTN2
ASXL3
AP2S1
ATP10A
ATP1A1
ATP6V0A2
ALG6
AUTS2
AZGP1
BAZ2B
BBS4
BCAS1
BCKDK
BCL11A
BCORL1
BIRC6
BRAF
BRD4
BRSK2
BRWD3
BTAF1
BTRC
C12orf57
C15orf62
CA6
CACNA1E
CACNA1F
CACNA1G
CACNA1H
CACNA1I
CACNA2D1
CACNA2D3
CADM1
AVPR1B
CADM2
CADPS
CADPS2
CAMK2B
CAPN12
CARD11
CASC4
CASK
CASZ1
CC2D1A
BICDL1
CCDC88C
CCDC91
CCIN
CCNG1
CCNK
CCSER1
CCT4
CD276
CD99L2
CDC42BPB
CDH22
CDK13
CDKL5
CECR2
CELF4
CELF6
CEP135
CEP290
CEP41
CGNL1
CHAMP1
CHD3
CHD7
CHD8
CHKB
CHMP1A
CHRNB3
CIB2
CIC
CLASP1
CLTCL1
CMIP
CMPK2
CNGB3
CNKSR2
CNOT3
CNR1
CNTN4
CNTN5
CNTN6
CNTNAP2
CNTNAP3
CNTNAP4
CNTNAP5
COL28A1
CPT2
CPZ
CSDE1
CSMD1
CSNK1E
CTCF
CTNNA2
CTNNA3
CTTNBP2
CUL3
CUL7
CORO1A
CPEB4
CUX2
CYFIP1
CYLC2
DAPP1
DDX53
DEAF1
DENR
DEPDC5
DHX30
DIP2A
DIP2C
DISC1
DIXDC1
DLG1
DLG2
DIPK2A
DLGAP1
DLGAP2
DLGAP3
DLL1
DLX3
DMPK
DMWD
DMXL2
DNAH10
DNAH17
DNAH3
DNER
DOCK1
DOCK4
DOCK8
DOLK
DPP10
DPP3
DUSP15
DVL3
DYDC1
DYDC2
EBF3
EFR3A
EGR3
EHMT1
EIF3G
ELAVL3
ELOVL2
ELP4
EP400
EMSY
EIF4G1
EPC2
EPPK1
ERMN
ESRRB
ETFB
EXOC3
EXOC5
EXOC6
EXOC6B
FAM47A
FAM92B
FAM98C
FAN1
FAT1
ERBIN
FBXO11
FBXO40
FCRL6
FEZF2
FOXP1
FOXP2
FRK
FRMPD4
GABBR2
GALNT13
GALNT14
GALNT8
GDA
FBXO33
GAS2
GGNBP2
GIGYF1
GIGYF2
GLIS1
GNAS
GNB1L
GPC4
GPC6
GPD2
GPHN
GPR85
GRID1
GRID2IP
GRIK3
GRIK5
GNAI1
GRIP1
HCN1
HDAC4
HDAC8
HECTD4
HECW2
HEPACAM
H2BC11
HERC2
HIVEP3
HOMER1
HTR3C
HUWE1
HYDIN
IL1R2
IL1RAPL1
IL1RAPL2
ILF2
IMMP2L
INTS1
INTS6
IQGAP3
IQSEC2
IRF2BPL
ITSN1
JMJD1C
KANK1
KANSL1
KAT2B
KAT6A
KATNAL1
KATNAL2
KCNC1
KCND3
KCNJ15
KCNK7
KCNQ3
KCNS3
KCTD13
KDM1B
KDM3B
KDM4B
KDM4C
KDM5B
KDM5C
KDM6A
KDM6B
KHDRBS2
KIAA1586
KIAA0232
KIF13B
KIF14
KIF5C
KIRREL3
KLF16
HS3ST5
HSD11B1
KMT2C
KMT2E
KMT5B
KPTN
KRR1
KRT26
LAMA1
LEO1
LILRB2
LIN7B
LRBA
LRFN2
LRFN5
LNPK
LRRC1
LRRC4
LZTR1
MACROD2
MAGEL2
MBD3
MBD4
MBD5
MBD6
MBOAT7
MCM4
MCM6
MCPH1
MDGA2
LDB1
LRRC4C
LZTS2
MED12L
MED13
MED13L
MEGF10
MEGF11
MEMO1
MFRP
MIB1
MLANA
MPP6
MSANTD2
MSNP1AS
MSR1
METTL26
MIR137
MRTFB
MUC12
MUC4
MYH4
MYO16
MYO1E
MYO5A
MYO5C
MYO9B
MYT1L
MAP1A
MKX
NAA15
NAALADL2
NACC1
NAV2
NBEA
NCKAP1
NCKAP5
NCOR1
NEGR1
NFE2L3
NFIA
NEXMIF
NFIX
NINL
NIPA1
NIPA2
NIPBL
NLGN1
NLGN2
NLGN3
NLGN4X
NLGN4Y
NR1D1
NR2F1
NCOA1
NOTCH2NL
NRP2
NRXN1
NRXN2
NRXN3
NSD1
NTNG1
NTNG2
NTRK3
NUAK1
NUDCD2
NUP133
NXPH1
ODF3L2
OFD1
OR1C1
OR2T10
OR52M1
OTUD7A
NSMCE3
P2RX5
P4HA2
PACS1
PACS2
PAFAH1B2
PAK1
PAPOLG
PARD3B
PAX5
PBX1
PCCA
PCCB
PATJ
PCDH10
PCDH11X
PCDH15
PCDH19
PCDHA1
PCDHA10
PCDHA11
PCDHA12
PCDHA13
PCDHA2
PCDHA3
PCDHA4
PCDHA5
PCDHA6
PCDHA7
PCDHA8
PCDHA9
PCDHAC1
PCM1
PDCD1
PDE1C
PDK2
PER2
PHF2
PHF21A
PHF3
PHF8
PHIP
PHRF1
PIK3R2
PLCB1
PLCD4
PLN
PLXNA3
PLXNA4
PLXNB1
PNPLA7
POGZ
POLA2
POMGNT1
POMT1
POT1
PPFIA1
PPM1D
PPP2R1B
PREX1
PRICKLE1
PRICKLE2
PRKAR1B
PRKCA
PRKD1
PRKD2
PRKDC
PRPF39
PRR12
PRUNE2
OR2M4
PCDHAC2
PHF12
PPP1R1B
PPP1R9B
PPP5C
PSD3
PTBP2
PTCHD1
NUP155
PTCHD1-AS
PTGS2
PTK7
PTPN11
PTPRB
PTPRC
PTPRT
PXDN
PYHIN1
QRICH1
RAB11FIP5
RAB2A
RAB39B
RAB43
RAC1
RAD21L1
RAI1
RALA
RALGAPB
RANBP17
RAPGEF4
RASSF5
RBFOX1
RBM27
REEP3
RFX3
RGS7
RHEB
RIMS1
RIMS3
RLIM
RNF135
RNF25
RNF38
ROBO2
RORA
RORB
RPL10
RPS6KA2
RPS6KA3
SAE1
SAMD11
SASH1
SATB2
SBF1
SCFD2
SCN1A
RP11-1407O15.2
SCN2A
RAD21
RHOXF1
RIT2
SATB1
SCN4A
SCN8A
RPS10P2-AS1
SCN9A
SCP2
SDC2
SEMA5A
SET
SETBP1
SETD1B
SETD2
SETD5
SETDB1
SETDB2
SEZ6L2
SF3B1
SGSH
SGSM3
SH3RF3
SHANK1
SHANK2
SHANK3
SHOX
SIK1
SIN3A
SLC12A5
SLC1A1
SLC1A2
SLC22A9
SLC24A2
SLC25A12
SLC25A39
SLC27A4
SLC29A4
SLC38A10
SLC45A1
SLC4A10
SLC6A1
SKI
SLC22A15
SLC6A3
SLC6A4
SLC6A8
SLC7A3
SLC7A5
SLC7A7
SLC9A6
SLC25A27
SLC35B1
SLC9A9
SLCO1B3
SLITRK5
SMAD4
SMARCA2
SMARCA4
SMARCC2
SMC1A
SMC3
SMG6
SMURF1
SNAP25
SND1
SNTG2
SNX14
SNX5
SOD1
SON
SOX5
SPARCL1
SPAST
SPEN
SPP2
SRCAP
SRGAP3
SRSF11
SSPO
SSRP1
ST7
ST8SIA2
STAG1
STX1A
STXBP1
STXBP5
STYK1
SYAP1
SYN1
SYN2
SYNCRIP
SYNE1
SYNGAP1
STK39
SUPT16H
SYNJ1
SYT1
SYT17
TAF1
TAF1C
TAF6
TANC2
SRPRA
TAOK1
TAOK2
TBC1D23
TBC1D31
TBC1D5
TBCK
TBL1XR1
TBR1
TBX1
TCF20
TCF4
TCF7L2
TECTA
TERF2
TET2
THBS1
THRA
TLK2
TM4SF19
TM4SF20
TMEM39B
TMLHE
TNRC6B
TOP3B
TERB2
TEK
TET3
TM9SF4
TRAF7
TRAPPC6B
TRAPPC9
TRIM23
TRIM32
TRIO
TRIP12
TRPC6
TRPM1
TRRAP
TSC1
TSC2
TSHZ3
TSPAN17
TSPAN4
TSPAN7
TTI2
TTN
TUBGCP5
UBE3A
TSPOAP1
UBE3C
UBN2
UBR5
UIMC1
UNC13A
UNC79
UNC80
UPF2
UPF3B
USH2A
USP15
USP45
USP7
TBL1X
TDO2
TPO
TRIM33
TTC25
UBE2H
USP9X
USP9Y
VAMP2
VASH1
VDR
VEZF1
VIL1
VPS13B
VSIG4
UBR1
WAC
WASF1
WDFY3
WDFY4
WDR26
WNK3
WNT1
WWOX
XPC
XPO1
YEATS2
YTHDC2
YWHAE
YY1
ZBTB16
ZBTB20
ZC3H11A
ZC3H4
ZFYVE26
ZMYND11
YWHAG
ZMIZ1
ZMYND8
ZNF18
ZNF292
ZNF385B
ZNF462
ZNF517
ZNF548
ZNF559
ZNF626
ZNF713
ZNF774
ZNF804A
ZNF827
ZSWIM6
ZWILCH
ADAMTS18
AFF4
ALOX5AP
AMBRA1
ARHGAP15
ARHGAP24
ARHGAP33
ASS1
ATG7
ATP8A1
ATRNL1
ATXN7
BAIAP2
BIN1
CAMSAP2
CAMTA1
CBLN1
CD44
CDKN1B
CHD5
CHST5
CLSTN2
CLSTN3
COP1
CRHR2
CSNK1D
CXCR3
DAPK1
DCTN5
DCUN1D1
DCX
DDX11
DGKK
DGKZ
DIAPH3
DLGAP4
DNAJC19
DNM1L
DOCK10
DUSP22
DVL1
EML1
EPHA6
EPHB6
F13A1
FAM135B
FBXO15
FGD1
FGFBP3
FLT1
GABRQ
GADD45B
GAN
GAP43
GNA14
GPR139
GPRASP2
GRM4
GSN
HDAC3
HDAC6
HDC
IFNGR1
IL17RA
ITGB7
JAKMIP1
KCNJ12
KCNT1
KHDRBS3
KIF21B
KIT
KLC2
KMO
LAMC3
LAT
LPL
LRP2BP
LRPPRC
LRRC7
MAGED1
MAL
MAPK12
MAPK8IP2
MC4R
MED12
MOCOS
MTX2
MYO1A
MYOZ1
NCKAP5L
NEFL
NOS1AP
NR1H2
NXF5
OGT
P2RX4
PCDH8
PCDHGA11
PDZD4
PECR
PGLYRP2
PINX1
PLCD1
PLPPR4
PPP1R3F
PRSS38
PSMD10
PTGER3
PVALB
RAB19
RASD1
RB1CC1
RBM8A
RBMS3
RNPS1
ROBO1
RPP25
SCN5A
SCN7A
SDK1
SEMA3F
SH3KBP1
SH3RF2
SLC13A4
SLC16A3
SLC16A7
SLC22A3
SLC25A14
SLC25A24
SLC30A3
SLC30A5
SLC33A1
SLC35A3
SLC39A11
SLIT3
SNRPN
SNX19
SRD5A2
SRRM4
STAT1
SUCLG2
SYN3
SYT3
TAF1L
TAFA2
TAFA3
TBC1D7
TERT
TGM3
TH
THAP8
TMEM231
TNIP2
TNN
TOMM20
TOP1
TPH2
TSN
TYR
UBA6
UBE3B
UBL7
UBR7
UCN3
UPB1
UTRN
VIP
VLDLR
VRK3
WDR93
WNT2
XIRP1
ZNF407
ZNF8
ZSWIM5
