# Supplementary material for: ASDmiR: A Stepwise Method to Uncover miRNA Regulation Related to Autism Spectrum Disorder
Source: Front Genet. 2020 Oct 14;11:562971. doi: 10.3389/fgene.2020.562971 (PMC7591752; doi:10.3389/fgene.2020.562971)
Supplement: Supplementary Table 3 — The Identified miRNA-target interactions and miRNA sponge interactions. [file Table_3.XLSX]

## Sheet: The identified miRNA-target
The Identified miRNA-target interactions by the ProMISe method
miRNAs	Targets
hsa-miR-125a-5p	MALAT1
hsa-miR-125a-5p	SCARNA10
hsa-miR-125a-5p	DLEU2
hsa-miR-125a-5p	PP7080
hsa-miR-125a-5p	SNHG17
hsa-miR-125a-5p	MIR600HG
hsa-miR-125a-5p	MIR7-3HG
hsa-miR-127-3p	MALAT1
hsa-miR-130a-3p	MALAT1
hsa-miR-130a-3p	ERVK13-1
hsa-miR-133b	MALAT1
hsa-miR-133b	JPX
hsa-miR-134-5p	MALAT1
hsa-miR-134-5p	LINC00324
hsa-miR-139-5p	MALAT1
hsa-miR-139-5p	LRRC75A-AS1
hsa-miR-139-5p	DGCR5
hsa-miR-139-5p	THUMPD3-AS1
hsa-miR-139-5p	DGCR11
hsa-miR-144-3p	MALAT1
hsa-miR-144-3p	ZFAS1
hsa-miR-144-3p	LINC00476
hsa-miR-144-3p	SNHG17
hsa-miR-147a	MALAT1
hsa-miR-148a-3p	MALAT1
hsa-miR-148a-3p	RMRP
hsa-miR-148a-3p	DGCR11
hsa-miR-148a-3p	LINC00665
hsa-miR-148b-3p	MALAT1
hsa-miR-148b-3p	RMRP
hsa-miR-148b-3p	DLEU2
hsa-miR-148b-3p	ZFAS1
hsa-miR-148b-3p	MIR600HG
hsa-miR-148b-3p	MAPKAPK5-AS1
hsa-miR-148b-3p	DGCR11
hsa-miR-148b-3p	LINC00665
hsa-miR-148b-3p	JPX
hsa-miR-149-5p	MALAT1
hsa-miR-149-5p	RPPH1
hsa-miR-149-5p	CTC-338M12-4
hsa-miR-149-5p	MIR600HG
hsa-miR-149-5p	MAPKAPK5-AS1
hsa-miR-149-5p	LINC01128
hsa-miR-150-5p	MALAT1
hsa-miR-150-5p	EPB41L4A-AS1
hsa-miR-150-5p	PINK1-AS
hsa-miR-154-5p	MALAT1
hsa-miR-154-5p	LRRC75A-AS1
hsa-miR-15a-5p	MALAT1
hsa-miR-15a-5p	DLEU2
hsa-miR-15a-5p	ZFAS1
hsa-miR-15a-5p	SNHG12
hsa-miR-15a-5p	CTC-338M12.4
hsa-miR-15a-5p	TERC
hsa-miR-15a-5p	KLF3-AS1
hsa-miR-15a-5p	LINC00839
hsa-miR-15a-5p	C1RL-AS1
hsa-miR-15a-5p	LINC01405
hsa-miR-15a-5p	FLJ37035
hsa-miR-181c-5p	MALAT1
hsa-miR-181c-5p	TRHDE-AS1
hsa-miR-181c-5p	ZFAS1
hsa-miR-181c-5p	SNHG12
hsa-miR-181c-5p	THUMPD3-AS1
hsa-miR-181c-5p	DGCR11
hsa-miR-183-5p	LRRC75A-AS1
hsa-miR-183-5p	MGC27345
hsa-miR-183-5p	THUMPD3-AS1
hsa-miR-185-5p	MALAT1
hsa-miR-185-5p	SCARNA9
hsa-miR-185-5p	RPPH1
hsa-miR-185-5p	ZFAS1
hsa-miR-185-5p	MAPT-AS1
hsa-miR-185-5p	PP7080
hsa-miR-185-5p	NBR2
hsa-miR-185-5p	SNHG12
hsa-miR-185-5p	H1FX-AS1
hsa-miR-185-5p	THUMPD3-AS1
hsa-miR-187-3p	MIR503HG
hsa-miR-187-3p	SNHG12
hsa-miR-187-3p	LINC00476
hsa-miR-192-5p	MALAT1
hsa-miR-192-5p	RPPH1
hsa-miR-192-5p	SNHG12
hsa-miR-192-5p	CSNK1G2-AS1
hsa-miR-192-5p	PINK1-AS
hsa-miR-195-5p	MALAT1
hsa-miR-195-5p	DLEU2
hsa-miR-195-5p	ZFAS1
hsa-miR-195-5p	SNHG12
hsa-miR-195-5p	CTC-338M12.4
hsa-miR-195-5p	TERC
hsa-miR-195-5p	KLF3-AS1
hsa-miR-195-5p	LINC00839
hsa-miR-195-5p	C1RL-AS1
hsa-miR-195-5p	LINC01405
hsa-miR-195-5p	FLJ37035
hsa-miR-197-3p	MALAT1
hsa-miR-197-3p	LRRC75A-AS1
hsa-miR-197-3p	MIR600HG
hsa-miR-197-3p	LINC00324
hsa-miR-200a-3p	MALAT1
hsa-miR-200a-3p	HCP5
hsa-miR-200a-3p	ASB16-AS1
hsa-miR-200b-3p	MALAT1
hsa-miR-200b-3p	DLEU2
hsa-miR-200b-3p	ASB16-AS1
hsa-miR-200b-3p	MAPKAPK5-AS1
hsa-miR-200c-3p	MALAT1
hsa-miR-200c-3p	DLEU2
hsa-miR-200c-3p	ASB16-AS1
hsa-miR-200c-3p	MAPKAPK5-AS1
hsa-miR-204-5p	MALAT1
hsa-miR-204-5p	TRHDE-AS1
hsa-miR-204-5p	SNHG17
hsa-miR-204-5p	MIR7-3HG
hsa-miR-211-5p	MALAT1
hsa-miR-212-3p	MALAT1
hsa-miR-212-3p	DLEU2
hsa-miR-221-3p	MALAT1
hsa-miR-221-3p	LRRC75A-AS1
hsa-miR-221-3p	SNHG12
hsa-miR-221-3p	MGC27345
hsa-miR-222-3p	MALAT1
hsa-miR-222-3p	LRRC75A-AS1
hsa-miR-23a-3p	MALAT1
hsa-miR-23a-3p	HCP5
hsa-miR-23a-3p	LRRC75A-AS1
hsa-miR-23a-3p	EPB41L4A-AS1
hsa-miR-23a-3p	TPT1-AS1
hsa-miR-23a-3p	SNHG12
hsa-miR-23a-3p	MGC27345
hsa-miR-23a-3p	MAPKAPK5-AS1
hsa-miR-23a-3p	ZNF295-AS1
hsa-miR-25-3p	MALAT1
hsa-miR-25-3p	RPPH1
hsa-miR-25-3p	THUMPD3-AS1
hsa-miR-25-3p	DGCR11
hsa-miR-25-3p	LINC01128
hsa-miR-26b-5p	MALAT1
hsa-miR-26b-5p	SCARNA9
hsa-miR-26b-5p	ZFAS1
hsa-miR-26b-5p	SNHG17
hsa-miR-26b-5p	CSNK1G2-AS1
hsa-miR-26b-5p	THUMPD3-AS1
hsa-miR-30b-5p	MALAT1
hsa-miR-30b-5p	SCARNA9
hsa-miR-30b-5p	TRHDE-AS1
hsa-miR-30b-5p	RAMP2-AS1
hsa-miR-30b-5p	EPB41L4A-AS1
hsa-miR-30b-5p	SNHG17
hsa-miR-30b-5p	MIR600HG
hsa-miR-30b-5p	THUMPD3-AS1
hsa-miR-30b-5p	LOC100128288
hsa-miR-30d-5p	MALAT1
hsa-miR-30d-5p	SNHG17
hsa-miR-30d-5p	MIR600HG
hsa-miR-30d-5p	LOC100128288
hsa-miR-31-5p	MALAT1
hsa-miR-31-5p	MIR503HG
hsa-miR-31-5p	LRRC75A-AS1
hsa-miR-31-5p	ZFAS1
hsa-miR-31-5p	MIR7-3HG
hsa-miR-31-5p	FBXL19-AS1
hsa-miR-32-5p	MALAT1
hsa-miR-32-5p	HCP5
hsa-miR-32-5p	THUMPD3-AS1
hsa-miR-32-5p	LINC01128
hsa-miR-326	MALAT1
hsa-miR-326	RPPH1
hsa-miR-326	DLGAP1-AS1
hsa-miR-326	SNHG12
hsa-miR-326	CSNK1G2-AS1
hsa-miR-326	ATP6V0E2-AS1
hsa-miR-326	ARRDC1-AS1
hsa-miR-330-3p	MALAT1
hsa-miR-330-3p	HCP5
hsa-miR-330-3p	RPPH1
hsa-miR-330-3p	LRRC75A-AS1
hsa-miR-330-3p	ZFAS1
hsa-miR-330-3p	SNHG12
hsa-miR-330-3p	LINC00476
hsa-miR-330-3p	SNHG17
hsa-miR-330-3p	ATP6V0E2-AS1
hsa-miR-330-3p	EMC3-AS1
hsa-miR-330-3p	LOC646471
hsa-miR-330-3p	ZNF667-AS1
hsa-miR-34b-5p	LRRC75A-AS1
hsa-miR-34b-5p	ZFAS1
hsa-miR-34b-5p	SNHG12
hsa-miR-377-3p	MALAT1
hsa-miR-377-3p	HCP5
hsa-miR-377-3p	TRHDE-AS1
hsa-miR-377-3p	SCARNA5
hsa-miR-377-3p	ZFAS1
hsa-miR-377-3p	SNHG12
hsa-miR-377-3p	THUMPD3-AS1
hsa-miR-377-3p	KTN1-AS1
hsa-miR-377-3p	LINC00665
hsa-miR-382-5p	MALAT1
hsa-miR-382-5p	HCP5
hsa-miR-382-5p	SCARNA9
hsa-miR-382-5p	LRRC75A-AS1
hsa-miR-382-5p	ERVK13-1
hsa-miR-382-5p	LINC00909
hsa-miR-382-5p	SNHG12
hsa-miR-382-5p	THUMPD3-AS1
hsa-miR-429	MALAT1
hsa-miR-429	DLEU2
hsa-miR-429	SNHG12
hsa-miR-429	SNHG17
hsa-miR-429	MAPKAPK5-AS1
hsa-miR-429	DLEU1
hsa-miR-455-5p	MALAT1
hsa-miR-495-3p	MALAT1
hsa-miR-495-3p	SNHG12
hsa-miR-622	MALAT1
hsa-miR-622	RPPH1
hsa-miR-93-5p	MALAT1
hsa-miR-93-5p	MGC27345
hsa-miR-93-5p	MIR600HG
hsa-miR-93-5p	PINK1-AS
hsa-miR-93-5p	ARRDC1-AS1
hsa-miR-99a-5p	HOXB-AS3
hsa-miR-99a-5p	THUMPD3-AS1
hsa-miR-99a-5p	DLEU1
hsa-miR-99a-5p	ARRDC1-AS1
hsa-miR-99a-5p	LINC01128
hsa-let-7a-2	MALAT1
hsa-let-7a-2	SCARNA10
hsa-let-7a-2	TPT1-AS1
hsa-let-7a-2	SNHG12
hsa-let-7c	MALAT1
hsa-let-7c	SCARNA10
hsa-let-7c	TPT1-AS1
hsa-let-7c	SNHG12
hsa-let-7c	LINC00665
hsa-let-7d-5p	MALAT1
hsa-let-7d-5p	SCARNA10
hsa-let-7d-5p	LRRC75A-AS1
hsa-let-7d-5p	MIR600HG
hsa-miR-125a-5p	MCL1
hsa-miR-125a-5p	DDX17
hsa-miR-125a-5p	ACTR3
hsa-miR-125a-5p	PRKAR1A
hsa-miR-125a-5p	ELF1
hsa-miR-125a-5p	DDX5
hsa-miR-125a-5p	RNPS1
hsa-miR-125a-5p	RBM39
hsa-miR-125a-5p	SLC38A2
hsa-miR-125a-5p	MGEA5
hsa-miR-125a-5p	ARPC5
hsa-miR-125a-5p	AHNAK
hsa-miR-125a-5p	DOCK11
hsa-miR-125a-5p	SERINC3
hsa-miR-125a-5p	SERINC1
hsa-miR-125a-5p	HNRNPU
hsa-miR-125a-5p	RSRP1
hsa-miR-125a-5p	CAPNS1
hsa-miR-125a-5p	CFLAR
hsa-miR-125a-5p	SSR1
hsa-miR-125a-5p	TMEM50A
hsa-miR-125a-5p	SFPQ
hsa-miR-125a-5p	ATP5A1
hsa-miR-125a-5p	NPM1
hsa-miR-125a-5p	TGOLN2
hsa-miR-126-3p	MCL1
hsa-miR-126-3p	CD74
hsa-miR-126-3p	FTL
hsa-miR-126-3p	VNN2
hsa-miR-126-3p	ETS1
hsa-miR-126-3p	SIRT1
hsa-miR-126-3p	RPS8
hsa-miR-126-3p	RNPS1
hsa-miR-126-3p	RPL37A
hsa-miR-126-3p	CSTB
hsa-miR-126-3p	HIST2H2AC
hsa-miR-126-3p	ARHGAP15
hsa-miR-126-3p	2020-03-08
hsa-miR-126-3p	CHPT1
hsa-miR-126-3p	TUBB
hsa-miR-126-3p	ADAM10
hsa-miR-126-3p	CDK9
hsa-miR-126-3p	ZNF217
hsa-miR-126-3p	CFLAR
hsa-miR-126-3p	GIMAP7
hsa-miR-126-3p	EMP3
hsa-miR-127-3p	MGEA5
hsa-miR-127-3p	AHNAK
hsa-miR-127-3p	TUBB
hsa-miR-130a-3p	B2M
hsa-miR-130a-3p	UBE2D3
hsa-miR-130a-3p	FTH1
hsa-miR-130a-3p	DDX17
hsa-miR-130a-3p	PRKAR1A
hsa-miR-130a-3p	DCAF12
hsa-miR-130a-3p	STK4
hsa-miR-130a-3p	DDX5
hsa-miR-130a-3p	RGS2
hsa-miR-130a-3p	LBR
hsa-miR-130a-3p	ARPC2
hsa-miR-130a-3p	ATP6V0E1
hsa-miR-130a-3p	ATM
hsa-miR-130a-3p	SLC38A2
hsa-miR-130a-3p	BCL2L1
hsa-miR-130a-3p	DDX6
hsa-miR-130a-3p	DDA1
hsa-miR-130a-3p	PURB
hsa-miR-130a-3p	SERINC3
hsa-miR-130a-3p	C6orf62
hsa-miR-130a-3p	SRSF1
hsa-miR-130a-3p	H3F3B
hsa-miR-130a-3p	RNF149
hsa-miR-130a-3p	PSMB9
hsa-miR-130a-3p	2020-03-08
hsa-miR-130a-3p	TUBB
hsa-miR-130a-3p	SHOC2
hsa-miR-130a-3p	ZNF217
hsa-miR-130a-3p	M6PR
hsa-miR-130a-3p	APLP2
hsa-miR-130a-3p	CAB39
hsa-miR-130a-3p	SSR1
hsa-miR-130a-3p	WDR82
hsa-miR-130a-3p	KLF3
hsa-miR-130a-3p	ZFP36L2
hsa-miR-130a-3p	OXA1L
hsa-miR-130a-3p	TGOLN2
hsa-miR-130a-3p	TES
hsa-miR-133b	MCL1
hsa-miR-133b	FTL
hsa-miR-133b	DDX5
hsa-miR-133b	SIRT1
hsa-miR-133b	BCL2L1
hsa-miR-133b	HIST2H2AC
hsa-miR-133b	ZNF217
hsa-miR-134-5p	GOLPH3
hsa-miR-134-5p	PJA2
hsa-miR-134-5p	NPM1
hsa-miR-139-5p	MCL1
hsa-miR-139-5p	DDX17
hsa-miR-139-5p	FGL2
hsa-miR-139-5p	CDC42SE2
hsa-miR-139-5p	ZNF525
hsa-miR-139-5p	SF3B1
hsa-miR-139-5p	PGRMC2
hsa-miR-139-5p	GABARAP
hsa-miR-139-5p	HNRNPA2B1
hsa-miR-139-5p	KLHL11
hsa-miR-139-5p	PPIA
hsa-miR-139-5p	MGEA5
hsa-miR-139-5p	ZBTB39
hsa-miR-139-5p	DDX6
hsa-miR-139-5p	PURB
hsa-miR-139-5p	SRSF1
hsa-miR-139-5p	H3F3B
hsa-miR-139-5p	PIAS1
hsa-miR-139-5p	SLC25A6
hsa-miR-139-5p	XRCC5
hsa-miR-139-5p	ADAM10
hsa-miR-139-5p	NAP1L1
hsa-miR-139-5p	SHOC2
hsa-miR-139-5p	HNRNPU
hsa-miR-139-5p	ZNF217
hsa-miR-139-5p	APLP2
hsa-miR-139-5p	SSR1
hsa-miR-139-5p	WSB1
hsa-miR-139-5p	ZFP36L2
hsa-miR-144-3p	MCL1
hsa-miR-144-3p	CDC42SE2
hsa-miR-144-3p	ETS1
hsa-miR-144-3p	PGRMC2
hsa-miR-144-3p	SLC38A2
hsa-miR-144-3p	PURB
hsa-miR-144-3p	XRCC5
hsa-miR-144-3p	HNRNPU
hsa-miR-144-3p	ZNF217
hsa-miR-144-3p	RAB7A
hsa-miR-144-3p	NPM1
hsa-miR-144-3p	PDCD4
hsa-miR-144-3p	KLF3
hsa-miR-144-3p	ZFP36L2
hsa-miR-147a	DCAF12
hsa-miR-147a	CDC42SE2
hsa-miR-147a	ROGDI
hsa-miR-147a	RRAS
hsa-miR-147a	STRADB
hsa-miR-147a	DDX5
hsa-miR-147a	LBR
hsa-miR-147a	ETS1
hsa-miR-147a	ARPC2
hsa-miR-147a	TUBA1B
hsa-miR-147a	GABARAP
hsa-miR-147a	CD55
hsa-miR-147a	PFN1
hsa-miR-147a	MS4A1
hsa-miR-147a	DDA1
hsa-miR-147a	AHNAK
hsa-miR-147a	ANKRD44
hsa-miR-147a	PIAS1
hsa-miR-147a	TC2N
hsa-miR-147a	YPEL3
hsa-miR-147a	CHPT1
hsa-miR-147a	TUBB
hsa-miR-147a	IVNS1ABP
hsa-miR-147a	SERINC1
hsa-miR-147a	SELPLG
hsa-miR-147a	SHOC2
hsa-miR-147a	SH3BGRL
hsa-miR-147a	CAPNS1
hsa-miR-147a	TLR1
hsa-miR-147a	APLP2
hsa-miR-147a	CRLF3
hsa-miR-147a	SSR1
hsa-miR-147a	RBBP4
hsa-miR-147a	RAB7A
hsa-miR-147a	PJA2
hsa-miR-147a	WSB1
hsa-miR-147a	PDCD4
hsa-miR-147a	KLF3
hsa-miR-147a	EMP3
hsa-miR-147a	OXA1L
hsa-miR-147a	TES
hsa-miR-148a-3p	B2M
hsa-miR-148a-3p	UBE2D3
hsa-miR-148a-3p	NCF2
hsa-miR-148a-3p	ADIPOR1
hsa-miR-148a-3p	PRKAR1A
hsa-miR-148a-3p	STK4
hsa-miR-148a-3p	RGS2
hsa-miR-148a-3p	LBR
hsa-miR-148a-3p	RPS8
hsa-miR-148a-3p	ATM
hsa-miR-148a-3p	SLC38A2
hsa-miR-148a-3p	PNRC2
hsa-miR-148a-3p	DDX6
hsa-miR-148a-3p	PURB
hsa-miR-148a-3p	ANKRD44
hsa-miR-148a-3p	C6orf62
hsa-miR-148a-3p	SRSF1
hsa-miR-148a-3p	LDHB
hsa-miR-148a-3p	TUBB
hsa-miR-148a-3p	ADAM10
hsa-miR-148a-3p	NAP1L1
hsa-miR-148a-3p	SHOC2
hsa-miR-148a-3p	ZNF217
hsa-miR-148a-3p	PPP1CB
hsa-miR-148a-3p	CAPNS1
hsa-miR-148a-3p	APLP2
hsa-miR-148a-3p	CAB39
hsa-miR-148a-3p	RPL11
hsa-miR-148a-3p	WDR82
hsa-miR-148a-3p	TGOLN2
hsa-miR-148a-3p	TES
hsa-miR-148b-3p	B2M
hsa-miR-148b-3p	UBE2D3
hsa-miR-148b-3p	NCF2
hsa-miR-148b-3p	STK4
hsa-miR-148b-3p	SARAF
hsa-miR-148b-3p	RGS2
hsa-miR-148b-3p	LBR
hsa-miR-148b-3p	PGRMC2
hsa-miR-148b-3p	HNRNPA2B1
hsa-miR-148b-3p	ATM
hsa-miR-148b-3p	SLC38A2
hsa-miR-148b-3p	DDX6
hsa-miR-148b-3p	PURB
hsa-miR-148b-3p	ANKRD44
hsa-miR-148b-3p	C6orf62
hsa-miR-148b-3p	PCBP1
hsa-miR-148b-3p	PSMB9
hsa-miR-148b-3p	PIAS1
hsa-miR-148b-3p	TUBB
hsa-miR-148b-3p	ADAM10
hsa-miR-148b-3p	NAP1L1
hsa-miR-148b-3p	SERINC1
hsa-miR-148b-3p	SHOC2
hsa-miR-148b-3p	PCNX1
hsa-miR-148b-3p	PPP1CB
hsa-miR-148b-3p	RSRP1
hsa-miR-148b-3p	CAPNS1
hsa-miR-148b-3p	LEPROTL1
hsa-miR-148b-3p	PNISR
hsa-miR-148b-3p	APLP2
hsa-miR-148b-3p	CAB39
hsa-miR-148b-3p	MORF4L1
hsa-miR-148b-3p	RPL11
hsa-miR-148b-3p	TGOLN2
hsa-miR-148b-3p	TES
hsa-miR-149-5p	MCL1
hsa-miR-149-5p	UBE2D3
hsa-miR-149-5p	RPS16
hsa-miR-149-5p	FTH1
hsa-miR-149-5p	DDX17
hsa-miR-149-5p	SRSF5
hsa-miR-149-5p	STRADB
hsa-miR-149-5p	NACA
hsa-miR-149-5p	RPS9
hsa-miR-149-5p	SIRT1
hsa-miR-149-5p	ARPC2
hsa-miR-149-5p	GOLPH3
hsa-miR-149-5p	TUBA1B
hsa-miR-149-5p	RNPS1
hsa-miR-149-5p	SLC38A2
hsa-miR-149-5p	AHNAK
hsa-miR-149-5p	RPL13
hsa-miR-149-5p	HNRNPH1
hsa-miR-149-5p	C6orf62
hsa-miR-149-5p	SRSF1
hsa-miR-149-5p	USP15
hsa-miR-149-5p	NAP1L1
hsa-miR-149-5p	SERINC1
hsa-miR-149-5p	HNRNPU
hsa-miR-149-5p	ZNF217
hsa-miR-149-5p	M6PR
hsa-miR-149-5p	LEPROTL1
hsa-miR-149-5p	ACAP2
hsa-miR-149-5p	UCP2
hsa-miR-149-5p	TMEM50A
hsa-miR-149-5p	RBBP4
hsa-miR-149-5p	TBC1D15
hsa-miR-149-5p	ATP5A1
hsa-miR-149-5p	WSB1
hsa-miR-149-5p	ZFAND5
hsa-miR-149-5p	NPM1
hsa-miR-149-5p	KLF3
hsa-miR-150-5p	CYTIP
hsa-miR-150-5p	PURB
hsa-miR-150-5p	SERINC3
hsa-miR-150-5p	USP15
hsa-miR-150-5p	SERINC1
hsa-miR-150-5p	TMEM50A
hsa-miR-150-5p	SFPQ
hsa-miR-150-5p	ATP5A1
hsa-miR-150-5p	PDCD4
hsa-miR-152-3p	B2M
hsa-miR-152-3p	UBE2D3
hsa-miR-152-3p	NCF2
hsa-miR-152-3p	PRKAR1A
hsa-miR-152-3p	STRADB
hsa-miR-152-3p	LBR
hsa-miR-152-3p	PGRMC2
hsa-miR-152-3p	HNRNPA2B1
hsa-miR-152-3p	ATM
hsa-miR-152-3p	SLC38A2
hsa-miR-152-3p	DDX6
hsa-miR-152-3p	PURB
hsa-miR-152-3p	ANKRD44
hsa-miR-152-3p	C6orf62
hsa-miR-152-3p	TUBB
hsa-miR-152-3p	ADAM10
hsa-miR-152-3p	IVNS1ABP
hsa-miR-152-3p	SERINC1
hsa-miR-152-3p	CAPNS1
hsa-miR-152-3p	APLP2
hsa-miR-152-3p	RPL11
hsa-miR-152-3p	ZFAND5
hsa-miR-152-3p	TGOLN2
hsa-miR-154-5p	ACTR3
hsa-miR-154-5p	PNRC2
hsa-miR-154-5p	ZNF217
hsa-miR-154-5p	ACAP2
hsa-miR-15a-5p	MCL1
hsa-miR-15a-5p	UBE2D3
hsa-miR-15a-5p	DDX17
hsa-miR-15a-5p	ADIPOR1
hsa-miR-15a-5p	SLC25A39
hsa-miR-15a-5p	ACTR3
hsa-miR-15a-5p	PRKAR1A
hsa-miR-15a-5p	CDC42SE2
hsa-miR-15a-5p	ROGDI
hsa-miR-15a-5p	STRADB
hsa-miR-15a-5p	STK4
hsa-miR-15a-5p	DDX5
hsa-miR-15a-5p	LBR
hsa-miR-15a-5p	SF3B1
hsa-miR-15a-5p	CNBP
hsa-miR-15a-5p	HIST1H1E
hsa-miR-15a-5p	RNPS1
hsa-miR-15a-5p	GABARAP
hsa-miR-15a-5p	HNRNPA2B1
hsa-miR-15a-5p	ATP6V0E1
hsa-miR-15a-5p	PNRC2
hsa-miR-15a-5p	ZBTB39
hsa-miR-15a-5p	DDX6
hsa-miR-15a-5p	DOCK11
hsa-miR-15a-5p	SERINC3
hsa-miR-15a-5p	SALL1
hsa-miR-15a-5p	SRSF1
hsa-miR-15a-5p	H3F3B
hsa-miR-15a-5p	RNF149
hsa-miR-15a-5p	RBL2
hsa-miR-15a-5p	PIAS1
hsa-miR-15a-5p	XRCC5
hsa-miR-15a-5p	HSP90AB1
hsa-miR-15a-5p	CHPT1
hsa-miR-15a-5p	USP15
hsa-miR-15a-5p	TUBB
hsa-miR-15a-5p	ADAM10
hsa-miR-15a-5p	TRAM1
hsa-miR-15a-5p	IVNS1ABP
hsa-miR-15a-5p	CLEC2D
hsa-miR-15a-5p	SHOC2
hsa-miR-15a-5p	HNRNPU
hsa-miR-15a-5p	FKBP1A
hsa-miR-15a-5p	ARPC1B
hsa-miR-15a-5p	PNISR
hsa-miR-15a-5p	UCP2
hsa-miR-15a-5p	CAB39
hsa-miR-15a-5p	CFLAR
hsa-miR-15a-5p	CRLF3
hsa-miR-15a-5p	SFPQ
hsa-miR-15a-5p	WDR82
hsa-miR-15a-5p	WSB1
hsa-miR-15a-5p	NPM1
hsa-miR-15a-5p	PDCD4
hsa-miR-15a-5p	TGOLN2
hsa-miR-181c-5p	MCL1
hsa-miR-181c-5p	UBE2D3
hsa-miR-181c-5p	DDX17
hsa-miR-181c-5p	CDC42SE2
hsa-miR-181c-5p	DDX5
hsa-miR-181c-5p	LBR
hsa-miR-181c-5p	ETS1
hsa-miR-181c-5p	SIRT1
hsa-miR-181c-5p	ATM
hsa-miR-181c-5p	RBM39
hsa-miR-181c-5p	SLC38A2
hsa-miR-181c-5p	PNRC2
hsa-miR-181c-5p	AHNAK
hsa-miR-181c-5p	PURB
hsa-miR-181c-5p	HNRNPH1
hsa-miR-181c-5p	ANKRD44
hsa-miR-181c-5p	C6orf62
hsa-miR-181c-5p	PCBP1
hsa-miR-181c-5p	H3F3B
hsa-miR-181c-5p	FAR1
hsa-miR-181c-5p	TUBB
hsa-miR-181c-5p	SHOC2
hsa-miR-181c-5p	HNRNPU
hsa-miR-181c-5p	FKBP1A
hsa-miR-181c-5p	ZNF217
hsa-miR-181c-5p	PPP1CB
hsa-miR-181c-5p	PNISR
hsa-miR-181c-5p	WDR82
hsa-miR-181c-5p	WSB1
hsa-miR-181c-5p	KLF3
hsa-miR-181c-5p	ZFP36L2
hsa-miR-181c-5p	TGOLN2
hsa-miR-181c-5p	TES
hsa-miR-183-5p	MCL1
hsa-miR-183-5p	U2AF1
hsa-miR-183-5p	PRKAR1A
hsa-miR-183-5p	STK4
hsa-miR-183-5p	S100A11
hsa-miR-183-5p	RGS2
hsa-miR-183-5p	NACA
hsa-miR-183-5p	CNBP
hsa-miR-183-5p	GOLPH3
hsa-miR-183-5p	YBX3
hsa-miR-183-5p	PGRMC2
hsa-miR-183-5p	ATP6V0E1
hsa-miR-183-5p	PFN1
hsa-miR-183-5p	AHNAK
hsa-miR-183-5p	PURB
hsa-miR-183-5p	SERINC3
hsa-miR-183-5p	PCBP1
hsa-miR-183-5p	H3F3B
hsa-miR-183-5p	RNF149
hsa-miR-183-5p	TRAM1
hsa-miR-183-5p	SERINC1
hsa-miR-183-5p	SHOC2
hsa-miR-183-5p	FKBP1A
hsa-miR-183-5p	ZNF217
hsa-miR-183-5p	CAPNS1
hsa-miR-183-5p	PNISR
hsa-miR-183-5p	CAB39
hsa-miR-183-5p	MORF4L1
hsa-miR-183-5p	SFPQ
hsa-miR-183-5p	PDCD4
hsa-miR-183-5p	ZFP36L2
hsa-miR-183-5p	TES
hsa-miR-185-5p	MCL1
hsa-miR-185-5p	ADIPOR1
hsa-miR-185-5p	CORO1A
hsa-miR-185-5p	S100A11
hsa-miR-185-5p	LBR
hsa-miR-185-5p	ETS1
hsa-miR-185-5p	SF3B1
hsa-miR-185-5p	ARPC2
hsa-miR-185-5p	GABARAP
hsa-miR-185-5p	DDX6
hsa-miR-185-5p	AHNAK
hsa-miR-185-5p	CSTB
hsa-miR-185-5p	PCBP1
hsa-miR-185-5p	LDHB
hsa-miR-185-5p	FAR1
hsa-miR-185-5p	CHPT1
hsa-miR-185-5p	TUBB
hsa-miR-185-5p	SERINC1
hsa-miR-185-5p	FGFR1OP2
hsa-miR-185-5p	FKBP1A
hsa-miR-185-5p	ZNF217
hsa-miR-185-5p	CAPNS1
hsa-miR-185-5p	SFPQ
hsa-miR-185-5p	WSB1
hsa-miR-185-5p	NPM1
hsa-miR-185-5p	PDCD4
hsa-miR-185-5p	EMP3
hsa-miR-185-5p	TGOLN2
hsa-miR-187-3p	YBX3
hsa-miR-187-3p	HNRNPH1
hsa-miR-187-3p	RBL2
hsa-miR-187-3p	TES
hsa-miR-192-5p	B2M
hsa-miR-192-5p	PRKAR1A
hsa-miR-192-5p	ZNF525
hsa-miR-192-5p	STK4
hsa-miR-192-5p	SARAF
hsa-miR-192-5p	SIRT1
hsa-miR-192-5p	ATP6V0E1
hsa-miR-192-5p	CD55
hsa-miR-192-5p	DCXR
hsa-miR-192-5p	DDX6
hsa-miR-192-5p	PURB
hsa-miR-192-5p	C6orf62
hsa-miR-192-5p	RBL2
hsa-miR-192-5p	CHPT1
hsa-miR-192-5p	TUBB
hsa-miR-192-5p	PPP1CB
hsa-miR-192-5p	CAPNS1
hsa-miR-192-5p	LEPROTL1
hsa-miR-192-5p	CRLF3
hsa-miR-192-5p	SFPQ
hsa-miR-192-5p	WDR82
hsa-miR-192-5p	KLF3
hsa-miR-195-5p	MCL1
hsa-miR-195-5p	NCF2
hsa-miR-195-5p	DDX17
hsa-miR-195-5p	ADIPOR1
hsa-miR-195-5p	ACTR3
hsa-miR-195-5p	PRKAR1A
hsa-miR-195-5p	CDC42SE2
hsa-miR-195-5p	ROGDI
hsa-miR-195-5p	STRADB
hsa-miR-195-5p	DDX5
hsa-miR-195-5p	LBR
hsa-miR-195-5p	SF3B1
hsa-miR-195-5p	CNBP
hsa-miR-195-5p	HIST1H1E
hsa-miR-195-5p	AOAH
hsa-miR-195-5p	RNPS1
hsa-miR-195-5p	GABARAP
hsa-miR-195-5p	HNRNPA2B1
hsa-miR-195-5p	KLHL11
hsa-miR-195-5p	SNCA
hsa-miR-195-5p	HSD17B11
hsa-miR-195-5p	SLC38A2
hsa-miR-195-5p	PNRC2
hsa-miR-195-5p	ZBTB39
hsa-miR-195-5p	DDX6
hsa-miR-195-5p	DOCK11
hsa-miR-195-5p	SERINC3
hsa-miR-195-5p	CD44
hsa-miR-195-5p	SALL1
hsa-miR-195-5p	HIST2H2AC
hsa-miR-195-5p	SRSF1
hsa-miR-195-5p	RNF149
hsa-miR-195-5p	RBL2
hsa-miR-195-5p	PIAS1
hsa-miR-195-5p	HSP90AB1
hsa-miR-195-5p	CHPT1
hsa-miR-195-5p	USP15
hsa-miR-195-5p	TUBB
hsa-miR-195-5p	ADAM10
hsa-miR-195-5p	TRAM1
hsa-miR-195-5p	IVNS1ABP
hsa-miR-195-5p	CLEC2D
hsa-miR-195-5p	SHOC2
hsa-miR-195-5p	HNRNPU
hsa-miR-195-5p	FKBP1A
hsa-miR-195-5p	ARPC1B
hsa-miR-195-5p	PNISR
hsa-miR-195-5p	TLR1
hsa-miR-195-5p	APLP2
hsa-miR-195-5p	CAB39
hsa-miR-195-5p	CFLAR
hsa-miR-195-5p	SFPQ
hsa-miR-195-5p	PJA2
hsa-miR-195-5p	WDR82
hsa-miR-195-5p	WSB1
hsa-miR-195-5p	NPM1
hsa-miR-195-5p	PDCD4
hsa-miR-195-5p	TGOLN2
hsa-miR-197-3p	ADIPOR1
hsa-miR-197-3p	DCAF12
hsa-miR-197-3p	ELF1
hsa-miR-197-3p	SARAF
hsa-miR-197-3p	RGS2
hsa-miR-197-3p	CNBP
hsa-miR-197-3p	RPS8
hsa-miR-197-3p	RPL37A
hsa-miR-197-3p	HNRNPA2B1
hsa-miR-197-3p	ATP6V0E1
hsa-miR-197-3p	PPIA
hsa-miR-197-3p	BCL2L1
hsa-miR-197-3p	MGEA5
hsa-miR-197-3p	AHNAK
hsa-miR-197-3p	PURB
hsa-miR-197-3p	HNRNPH1
hsa-miR-197-3p	SRSF1
hsa-miR-197-3p	H3F3B
hsa-miR-197-3p	LDHB
hsa-miR-197-3p	XRCC5
hsa-miR-197-3p	NAP1L1
hsa-miR-197-3p	CDK9
hsa-miR-197-3p	HNRNPU
hsa-miR-197-3p	ZNF324B
hsa-miR-197-3p	E2F4
hsa-miR-197-3p	SSR1
hsa-miR-197-3p	PDCD4
hsa-miR-197-3p	TGOLN2
hsa-miR-200a-3p	MCL1
hsa-miR-200a-3p	PRKAR1A
hsa-miR-200a-3p	STK4
hsa-miR-200a-3p	SARAF
hsa-miR-200a-3p	SF3B1
hsa-miR-200a-3p	H3F3B
hsa-miR-200a-3p	RNF149
hsa-miR-200a-3p	HSP90AB1
hsa-miR-200a-3p	TUBB
hsa-miR-200a-3p	NAP1L1
hsa-miR-200a-3p	TRAM1
hsa-miR-200a-3p	SERINC1
hsa-miR-200a-3p	ZNF217
hsa-miR-200a-3p	E2F4
hsa-miR-200a-3p	SSR1
hsa-miR-200a-3p	SFPQ
hsa-miR-200a-3p	ZFAND5
hsa-miR-200a-3p	PDCD4
hsa-miR-200a-3p	KLF3
hsa-miR-200b-3p	MCL1
hsa-miR-200b-3p	LBR
hsa-miR-200b-3p	ETS1
hsa-miR-200b-3p	SIRT1
hsa-miR-200b-3p	ARPC2
hsa-miR-200b-3p	CD55
hsa-miR-200b-3p	SLC38A2
hsa-miR-200b-3p	DCXR
hsa-miR-200b-3p	DDX6
hsa-miR-200b-3p	AHNAK
hsa-miR-200b-3p	PURB
hsa-miR-200b-3p	HNRNPH1
hsa-miR-200b-3p	ANKRD44
hsa-miR-200b-3p	CD44
hsa-miR-200b-3p	C6orf62
hsa-miR-200b-3p	HIST2H2AC
hsa-miR-200b-3p	PCBP1
hsa-miR-200b-3p	TC2N
hsa-miR-200b-3p	ARPC3
hsa-miR-200b-3p	2020-03-08
hsa-miR-200b-3p	TUBB
hsa-miR-200b-3p	CLEC2D
hsa-miR-200b-3p	SERINC1
hsa-miR-200b-3p	SHOC2
hsa-miR-200b-3p	HNRNPU
hsa-miR-200b-3p	ZNF217
hsa-miR-200b-3p	PPP1CB
hsa-miR-200b-3p	M6PR
hsa-miR-200b-3p	CAB39
hsa-miR-200b-3p	CRLF3
hsa-miR-200b-3p	SSR1
hsa-miR-200b-3p	RBBP4
hsa-miR-200b-3p	SFPQ
hsa-miR-200b-3p	RAB7A
hsa-miR-200b-3p	WDR82
hsa-miR-200b-3p	WSB1
hsa-miR-200b-3p	PDCD4
hsa-miR-200b-3p	ZFP36L2
hsa-miR-200c-3p	MCL1
hsa-miR-200c-3p	NCF2
hsa-miR-200c-3p	STRADB
hsa-miR-200c-3p	STK4
hsa-miR-200c-3p	LBR
hsa-miR-200c-3p	ETS1
hsa-miR-200c-3p	SIRT1
hsa-miR-200c-3p	ARPC2
hsa-miR-200c-3p	SLC38A2
hsa-miR-200c-3p	DDX6
hsa-miR-200c-3p	AHNAK
hsa-miR-200c-3p	PURB
hsa-miR-200c-3p	HNRNPH1
hsa-miR-200c-3p	ANKRD44
hsa-miR-200c-3p	C6orf62
hsa-miR-200c-3p	PCBP1
hsa-miR-200c-3p	SRSF1
hsa-miR-200c-3p	TC2N
hsa-miR-200c-3p	YPEL3
hsa-miR-200c-3p	ARPC3
hsa-miR-200c-3p	2020-03-08
hsa-miR-200c-3p	TUBB
hsa-miR-200c-3p	CLEC2D
hsa-miR-200c-3p	SERINC1
hsa-miR-200c-3p	SHOC2
hsa-miR-200c-3p	HNRNPU
hsa-miR-200c-3p	ZNF217
hsa-miR-200c-3p	PPP1CB
hsa-miR-200c-3p	M6PR
hsa-miR-200c-3p	CAB39
hsa-miR-200c-3p	CRLF3
hsa-miR-200c-3p	SSR1
hsa-miR-200c-3p	SFPQ
hsa-miR-200c-3p	RAB7A
hsa-miR-200c-3p	WDR82
hsa-miR-200c-3p	WSB1
hsa-miR-200c-3p	PDCD4
hsa-miR-200c-3p	STK17A
hsa-miR-200c-3p	ZFP36L2
hsa-miR-204-5p	MCL1
hsa-miR-204-5p	FTL
hsa-miR-204-5p	ACTR3
hsa-miR-204-5p	PRKAR1A
hsa-miR-204-5p	SIRT1
hsa-miR-204-5p	RPS8
hsa-miR-204-5p	RNPS1
hsa-miR-204-5p	HNRNPA2B1
hsa-miR-204-5p	DDX6
hsa-miR-204-5p	AHNAK
hsa-miR-204-5p	PURB
hsa-miR-204-5p	SERINC3
hsa-miR-204-5p	CD44
hsa-miR-204-5p	H3F3B
hsa-miR-204-5p	RNF149
hsa-miR-204-5p	SHOC2
hsa-miR-204-5p	M6PR
hsa-miR-204-5p	PNISR
hsa-miR-204-5p	MORF4L1
hsa-miR-204-5p	PJA2
hsa-miR-204-5p	PDCD4
hsa-miR-204-5p	KLF3
hsa-miR-204-5p	TGOLN2
hsa-miR-210-3p	RPS3
hsa-miR-210-3p	MCL1
hsa-miR-210-3p	UBE2D3
hsa-miR-210-3p	SLC25A39
hsa-miR-210-3p	FGL2
hsa-miR-210-3p	PRKAR1A
hsa-miR-210-3p	CDC42SE2
hsa-miR-210-3p	RRAS
hsa-miR-210-3p	STK4
hsa-miR-210-3p	DDX5
hsa-miR-210-3p	S100A11
hsa-miR-210-3p	RGS2
hsa-miR-210-3p	RAC2
hsa-miR-210-3p	ETS1
hsa-miR-210-3p	SF3B1
hsa-miR-210-3p	GOLPH3
hsa-miR-210-3p	PGRMC2
hsa-miR-210-3p	KLHL11
hsa-miR-210-3p	RBM39
hsa-miR-210-3p	SLC38A2
hsa-miR-210-3p	PNRC2
hsa-miR-210-3p	DDX6
hsa-miR-210-3p	AHNAK
hsa-miR-210-3p	CSTB
hsa-miR-210-3p	CD44
hsa-miR-210-3p	PARP8
hsa-miR-210-3p	RNF149
hsa-miR-210-3p	LDHB
hsa-miR-210-3p	PIAS1
hsa-miR-210-3p	XRCC5
hsa-miR-210-3p	FAR1
hsa-miR-210-3p	2020-03-08
hsa-miR-210-3p	ADAM10
hsa-miR-210-3p	IVNS1ABP
hsa-miR-210-3p	SERINC1
hsa-miR-210-3p	SHOC2
hsa-miR-210-3p	SH3BGRL
hsa-miR-210-3p	PPP1CB
hsa-miR-210-3p	LEPROTL1
hsa-miR-210-3p	ACAP2
hsa-miR-210-3p	CAB39
hsa-miR-210-3p	CRLF3
hsa-miR-210-3p	RBBP4
hsa-miR-210-3p	TBC1D15
hsa-miR-210-3p	ZCCHC6
hsa-miR-210-3p	PJA2
hsa-miR-210-3p	WDR82
hsa-miR-210-3p	EMP3
hsa-miR-210-3p	ZFP36L2
hsa-miR-210-3p	TES
hsa-miR-211-5p	MCL1
hsa-miR-211-5p	HNRNPA2B1
hsa-miR-211-5p	AHNAK
hsa-miR-211-5p	SERINC3
hsa-miR-211-5p	CD44
hsa-miR-211-5p	M6PR
hsa-miR-212-3p	B2M
hsa-miR-212-3p	UBE2D3
hsa-miR-212-3p	PRKAR1A
hsa-miR-212-3p	CDC42SE2
hsa-miR-212-3p	ROGDI
hsa-miR-212-3p	ELF1
hsa-miR-212-3p	STK4
hsa-miR-212-3p	LBR
hsa-miR-212-3p	ETS1
hsa-miR-212-3p	CNBP
hsa-miR-212-3p	HIST1H1E
hsa-miR-212-3p	TUBA1B
hsa-miR-212-3p	ATM
hsa-miR-212-3p	SLC38A2
hsa-miR-212-3p	MGEA5
hsa-miR-212-3p	ZBTB39
hsa-miR-212-3p	DDX6
hsa-miR-212-3p	CD44
hsa-miR-212-3p	SRSF1
hsa-miR-212-3p	H3F3B
hsa-miR-212-3p	PSMB9
hsa-miR-212-3p	ZNF217
hsa-miR-212-3p	CFLAR
hsa-miR-212-3p	RPL11
hsa-miR-212-3p	SFPQ
hsa-miR-212-3p	RAB7A
hsa-miR-212-3p	KLF3
hsa-miR-221-3p	UBE2D3
hsa-miR-221-3p	DDX17
hsa-miR-221-3p	ADIPOR1
hsa-miR-221-3p	CORO1A
hsa-miR-221-3p	ELF1
hsa-miR-221-3p	STK4
hsa-miR-221-3p	ETS1
hsa-miR-221-3p	SIRT1
hsa-miR-221-3p	RNPS1
hsa-miR-221-3p	HNRNPA2B1
hsa-miR-221-3p	RBM39
hsa-miR-221-3p	SNCA
hsa-miR-221-3p	PPIA
hsa-miR-221-3p	PNRC2
hsa-miR-221-3p	DDX6
hsa-miR-221-3p	AHNAK
hsa-miR-221-3p	PURB
hsa-miR-221-3p	HIST2H2AC
hsa-miR-221-3p	H3F3B
hsa-miR-221-3p	LDHB
hsa-miR-221-3p	PSMB9
hsa-miR-221-3p	YPEL3
hsa-miR-221-3p	TRAM1
hsa-miR-221-3p	SERINC1
hsa-miR-221-3p	SH3BGRL
hsa-miR-221-3p	APLP2
hsa-miR-221-3p	MORF4L1
hsa-miR-221-3p	SFPQ
hsa-miR-221-3p	WDR82
hsa-miR-221-3p	ZFAND5
hsa-miR-221-3p	ZFP36L2
hsa-miR-221-3p	TGOLN2
hsa-miR-222-3p	ADIPOR1
hsa-miR-222-3p	CORO1A
hsa-miR-222-3p	ELF1
hsa-miR-222-3p	ETS1
hsa-miR-222-3p	RNPS1
hsa-miR-222-3p	HNRNPA2B1
hsa-miR-222-3p	PFN1
hsa-miR-222-3p	PNRC2
hsa-miR-222-3p	DDX6
hsa-miR-222-3p	HNRNPH1
hsa-miR-222-3p	SERINC3
hsa-miR-222-3p	USP15
hsa-miR-222-3p	TRAM1
hsa-miR-222-3p	SERINC1
hsa-miR-222-3p	HNRNPU
hsa-miR-222-3p	APLP2
hsa-miR-222-3p	MORF4L1
hsa-miR-222-3p	WDR82
hsa-miR-222-3p	ZFAND5
hsa-miR-222-3p	ZFP36L2
hsa-miR-223-3p	ATM
hsa-miR-223-3p	SERINC1
hsa-miR-23a-3p	MCL1
hsa-miR-23a-3p	UBE2D3
hsa-miR-23a-3p	FTH1
hsa-miR-23a-3p	DDX17
hsa-miR-23a-3p	PRKAR1A
hsa-miR-23a-3p	FBXO7
hsa-miR-23a-3p	DCAF12
hsa-miR-23a-3p	STK4
hsa-miR-23a-3p	DDX5
hsa-miR-23a-3p	LBR
hsa-miR-23a-3p	PGRMC2
hsa-miR-23a-3p	KLHL11
hsa-miR-23a-3p	SNCA
hsa-miR-23a-3p	SLC38A2
hsa-miR-23a-3p	PNRC2
hsa-miR-23a-3p	AHNAK
hsa-miR-23a-3p	PURB
hsa-miR-23a-3p	ANKRD44
hsa-miR-23a-3p	SERINC3
hsa-miR-23a-3p	CD44
hsa-miR-23a-3p	C6orf62
hsa-miR-23a-3p	PCBP1
hsa-miR-23a-3p	SRSF1
hsa-miR-23a-3p	H3F3B
hsa-miR-23a-3p	LDHB
hsa-miR-23a-3p	XRCC5
hsa-miR-23a-3p	FAR1
hsa-miR-23a-3p	ADAM10
hsa-miR-23a-3p	NAP1L1
hsa-miR-23a-3p	CDK9
hsa-miR-23a-3p	SERINC1
hsa-miR-23a-3p	SELPLG
hsa-miR-23a-3p	HNRNPU
hsa-miR-23a-3p	ZNF217
hsa-miR-23a-3p	PPP1CB
hsa-miR-23a-3p	APLP2
hsa-miR-23a-3p	CAB39
hsa-miR-23a-3p	CRLF3
hsa-miR-23a-3p	SSR1
hsa-miR-23a-3p	GIMAP7
hsa-miR-23a-3p	TMEM50A
hsa-miR-23a-3p	TBC1D15
hsa-miR-23a-3p	ATP5A1
hsa-miR-23a-3p	PJA2
hsa-miR-23a-3p	WSB1
hsa-miR-23a-3p	KLF3
hsa-miR-23a-3p	TES
hsa-miR-25-3p	MCL1
hsa-miR-25-3p	UBE2D3
hsa-miR-25-3p	FTH1
hsa-miR-25-3p	PRKAR1A
hsa-miR-25-3p	TNFRSF13C
hsa-miR-25-3p	LBR
hsa-miR-25-3p	ARPC2
hsa-miR-25-3p	KLHL11
hsa-miR-25-3p	SLC38A2
hsa-miR-25-3p	MGEA5
hsa-miR-25-3p	DDX6
hsa-miR-25-3p	AHNAK
hsa-miR-25-3p	PURB
hsa-miR-25-3p	CD44
hsa-miR-25-3p	C6orf62
hsa-miR-25-3p	PCBP1
hsa-miR-25-3p	H3F3B
hsa-miR-25-3p	RBL2
hsa-miR-25-3p	XRCC5
hsa-miR-25-3p	ARPC3
hsa-miR-25-3p	FAR1
hsa-miR-25-3p	2020-03-08
hsa-miR-25-3p	TUBB
hsa-miR-25-3p	SHOC2
hsa-miR-25-3p	HNRNPU
hsa-miR-25-3p	FGFR1OP2
hsa-miR-25-3p	FKBP1A
hsa-miR-25-3p	ZNF217
hsa-miR-25-3p	PPP1CB
hsa-miR-25-3p	PNISR
hsa-miR-25-3p	APLP2
hsa-miR-25-3p	TMEM50A
hsa-miR-25-3p	RAB7A
hsa-miR-25-3p	ATP5A1
hsa-miR-25-3p	WSB1
hsa-miR-25-3p	ZFAND5
hsa-miR-25-3p	NPM1
hsa-miR-25-3p	KLF3
hsa-miR-25-3p	ZFP36L2
hsa-miR-25-3p	TES
hsa-miR-26b-5p	B2M
hsa-miR-26b-5p	MCL1
hsa-miR-26b-5p	UBE2D3
hsa-miR-26b-5p	FTH1
hsa-miR-26b-5p	FTL
hsa-miR-26b-5p	DDX17
hsa-miR-26b-5p	ACTR3
hsa-miR-26b-5p	FGL2
hsa-miR-26b-5p	VNN2
hsa-miR-26b-5p	DCAF12
hsa-miR-26b-5p	ROGDI
hsa-miR-26b-5p	STRADB
hsa-miR-26b-5p	STK4
hsa-miR-26b-5p	DDX5
hsa-miR-26b-5p	CYTIP
hsa-miR-26b-5p	SF3B1
hsa-miR-26b-5p	CNBP
hsa-miR-26b-5p	PGRMC2
hsa-miR-26b-5p	GABARAP
hsa-miR-26b-5p	HNRNPA2B1
hsa-miR-26b-5p	CD55
hsa-miR-26b-5p	HSD17B11
hsa-miR-26b-5p	SLC38A2
hsa-miR-26b-5p	ARPC5
hsa-miR-26b-5p	ZBTB39
hsa-miR-26b-5p	DDX6
hsa-miR-26b-5p	AHNAK
hsa-miR-26b-5p	PURB
hsa-miR-26b-5p	HNRNPH1
hsa-miR-26b-5p	SALL1
hsa-miR-26b-5p	ITGB2
hsa-miR-26b-5p	H3F3B
hsa-miR-26b-5p	YPEL3
hsa-miR-26b-5p	XRCC5
hsa-miR-26b-5p	USP15
hsa-miR-26b-5p	ADAM10
hsa-miR-26b-5p	NAP1L1
hsa-miR-26b-5p	TRAM1
hsa-miR-26b-5p	CDK9
hsa-miR-26b-5p	IVNS1ABP
hsa-miR-26b-5p	SERINC1
hsa-miR-26b-5p	SHOC2
hsa-miR-26b-5p	SH3BGRL
hsa-miR-26b-5p	FGFR1OP2
hsa-miR-26b-5p	ZNF217
hsa-miR-26b-5p	PPP1CB
hsa-miR-26b-5p	RSRP1
hsa-miR-26b-5p	ZNF324B
hsa-miR-26b-5p	TLR1
hsa-miR-26b-5p	SSR1
hsa-miR-26b-5p	TMEM50A
hsa-miR-26b-5p	SFPQ
hsa-miR-26b-5p	TBC1D15
hsa-miR-26b-5p	PJA2
hsa-miR-26b-5p	ZFAND5
hsa-miR-26b-5p	EMP3
hsa-miR-26b-5p	ZFP36L2
hsa-miR-26b-5p	OXA1L
hsa-miR-30b-5p	UBE2D3
hsa-miR-30b-5p	PRKAR1A
hsa-miR-30b-5p	DCAF12
hsa-miR-30b-5p	DDX5
hsa-miR-30b-5p	RGS2
hsa-miR-30b-5p	LBR
hsa-miR-30b-5p	SIRT1
hsa-miR-30b-5p	YBX3
hsa-miR-30b-5p	HNRNPA2B1
hsa-miR-30b-5p	ATM
hsa-miR-30b-5p	SLC38A2
hsa-miR-30b-5p	MGEA5
hsa-miR-30b-5p	ARPC5
hsa-miR-30b-5p	PNRC2
hsa-miR-30b-5p	ZBTB39
hsa-miR-30b-5p	DDX6
hsa-miR-30b-5p	AHNAK
hsa-miR-30b-5p	PURB
hsa-miR-30b-5p	SERINC3
hsa-miR-30b-5p	SRSF1
hsa-miR-30b-5p	PIAS1
hsa-miR-30b-5p	TC2N
hsa-miR-30b-5p	FAR1
hsa-miR-30b-5p	USP15
hsa-miR-30b-5p	NAP1L1
hsa-miR-30b-5p	HNRNPU
hsa-miR-30b-5p	PPP1CB
hsa-miR-30b-5p	ACAP2
hsa-miR-30b-5p	PNISR
hsa-miR-30b-5p	E2F4
hsa-miR-30b-5p	APLP2
hsa-miR-30b-5p	PSMF1
hsa-miR-30b-5p	WDR82
hsa-miR-30b-5p	WSB1
hsa-miR-30b-5p	ZFAND5
hsa-miR-30b-5p	ZFP36L2
hsa-miR-30d-5p	MCL1
hsa-miR-30d-5p	UBE2D3
hsa-miR-30d-5p	PRKAR1A
hsa-miR-30d-5p	DCAF12
hsa-miR-30d-5p	ELF1
hsa-miR-30d-5p	DDX5
hsa-miR-30d-5p	LBR
hsa-miR-30d-5p	NACA
hsa-miR-30d-5p	YBX3
hsa-miR-30d-5p	ATM
hsa-miR-30d-5p	SLC38A2
hsa-miR-30d-5p	MGEA5
hsa-miR-30d-5p	ARPC5
hsa-miR-30d-5p	ZBTB39
hsa-miR-30d-5p	DDX6
hsa-miR-30d-5p	AHNAK
hsa-miR-30d-5p	HNRNPH1
hsa-miR-30d-5p	SERINC3
hsa-miR-30d-5p	SRSF1
hsa-miR-30d-5p	H3F3B
hsa-miR-30d-5p	TC2N
hsa-miR-30d-5p	USP15
hsa-miR-30d-5p	NAP1L1
hsa-miR-30d-5p	HNRNPU
hsa-miR-30d-5p	PPP1CB
hsa-miR-30d-5p	ACAP2
hsa-miR-30d-5p	PNISR
hsa-miR-30d-5p	E2F4
hsa-miR-30d-5p	APLP2
hsa-miR-30d-5p	PSMF1
hsa-miR-30d-5p	RAB7A
hsa-miR-30d-5p	PJA2
hsa-miR-30d-5p	WDR82
hsa-miR-30d-5p	ZFAND5
hsa-miR-30d-5p	KLF3
hsa-miR-30d-5p	ZFP36L2
hsa-miR-31-5p	S100A11
hsa-miR-31-5p	ATP6V0C
hsa-miR-31-5p	ETS1
hsa-miR-31-5p	CNBP
hsa-miR-31-5p	PGRMC2
hsa-miR-31-5p	RPL37A
hsa-miR-31-5p	ATP6V0E1
hsa-miR-31-5p	CD55
hsa-miR-31-5p	PPIA
hsa-miR-31-5p	ARPC5
hsa-miR-31-5p	ZBTB39
hsa-miR-31-5p	AHNAK
hsa-miR-31-5p	HNRNPH1
hsa-miR-31-5p	RNF149
hsa-miR-31-5p	XRCC5
hsa-miR-31-5p	CDK9
hsa-miR-31-5p	CAB39
hsa-miR-31-5p	ATP5A1
hsa-miR-31-5p	NPM1
hsa-miR-31-5p	STK17A
hsa-miR-32-5p	MCL1
hsa-miR-32-5p	UBE2D3
hsa-miR-32-5p	ACTR3
hsa-miR-32-5p	DDX5
hsa-miR-32-5p	TNFRSF13C
hsa-miR-32-5p	LBR
hsa-miR-32-5p	SF3B1
hsa-miR-32-5p	SIRT1
hsa-miR-32-5p	HNRNPA2B1
hsa-miR-32-5p	KLHL11
hsa-miR-32-5p	MPP1
hsa-miR-32-5p	SLC38A2
hsa-miR-32-5p	ARPC5
hsa-miR-32-5p	DDX6
hsa-miR-32-5p	HNRNPH1
hsa-miR-32-5p	C6orf62
hsa-miR-32-5p	PCBP1
hsa-miR-32-5p	H3F3B
hsa-miR-32-5p	RBL2
hsa-miR-32-5p	XRCC5
hsa-miR-32-5p	FAR1
hsa-miR-32-5p	ADAM10
hsa-miR-32-5p	SHOC2
hsa-miR-32-5p	HNRNPU
hsa-miR-32-5p	FKBP1A
hsa-miR-32-5p	ZNF217
hsa-miR-32-5p	PNISR
hsa-miR-32-5p	APLP2
hsa-miR-32-5p	RPL11
hsa-miR-32-5p	RAB7A
hsa-miR-32-5p	KLF3
hsa-miR-32-5p	TES
hsa-miR-326	ARPC2
hsa-miR-326	HNRNPA2B1
hsa-miR-326	BCL2L1
hsa-miR-326	HNRNPU
hsa-miR-326	ACAP2
hsa-miR-326	CFLAR
hsa-miR-326	NPM1
hsa-miR-330-3p	RPS3
hsa-miR-330-3p	SRSF5
hsa-miR-330-3p	LBR
hsa-miR-330-3p	ETS1
hsa-miR-330-3p	SF3B1
hsa-miR-330-3p	CNBP
hsa-miR-330-3p	TUBA1B
hsa-miR-330-3p	HNRNPA2B1
hsa-miR-330-3p	MGEA5
hsa-miR-330-3p	PFN1
hsa-miR-330-3p	PNRC2
hsa-miR-330-3p	PURB
hsa-miR-330-3p	CD44
hsa-miR-330-3p	C6orf62
hsa-miR-330-3p	LDHB
hsa-miR-330-3p	TUBB
hsa-miR-330-3p	ADAM10
hsa-miR-330-3p	RPL35
hsa-miR-330-3p	SERINC1
hsa-miR-330-3p	HNRNPU
hsa-miR-330-3p	ZNF217
hsa-miR-330-3p	MORF4L1
hsa-miR-330-3p	TMEM50A
hsa-miR-330-3p	SFPQ
hsa-miR-330-3p	SRSF3
hsa-miR-330-3p	PDCD4
hsa-miR-330-3p	TGOLN2
hsa-miR-330-3p	TES
hsa-miR-34b-5p	MCL1
hsa-miR-34b-5p	DDX17
hsa-miR-34b-5p	DDX5
hsa-miR-34b-5p	HIST1H1E
hsa-miR-34b-5p	ARPC5
hsa-miR-34b-5p	DDA1
hsa-miR-34b-5p	DPYD
hsa-miR-34b-5p	HSP90AB1
hsa-miR-34b-5p	NAP1L1
hsa-miR-34b-5p	LEPROTL1
hsa-miR-34b-5p	APLP2
hsa-miR-34b-5p	SFPQ
hsa-miR-377-3p	PTPRC
hsa-miR-377-3p	DDX17
hsa-miR-377-3p	DCAF12
hsa-miR-377-3p	DDX5
hsa-miR-377-3p	SARAF
hsa-miR-377-3p	RGS2
hsa-miR-377-3p	ETS1
hsa-miR-377-3p	ATM
hsa-miR-377-3p	HNRNPH1
hsa-miR-377-3p	SRSF1
hsa-miR-377-3p	FAR1
hsa-miR-377-3p	NAP1L1
hsa-miR-377-3p	APLP2
hsa-miR-377-3p	CAB39
hsa-miR-377-3p	WDR82
hsa-miR-377-3p	WSB1
hsa-miR-382-5p	CFL1
hsa-miR-382-5p	LBR
hsa-miR-382-5p	SF3B1
hsa-miR-382-5p	CNBP
hsa-miR-382-5p	CD55
hsa-miR-382-5p	RBM39
hsa-miR-382-5p	PCBP1
hsa-miR-382-5p	CAPNS1
hsa-miR-382-5p	LEPROTL1
hsa-miR-382-5p	PNISR
hsa-miR-382-5p	CAB39
hsa-miR-382-5p	ATP5A1
hsa-miR-382-5p	ZFP36L2
hsa-miR-429	MCL1
hsa-miR-429	NCF2
hsa-miR-429	STRADB
hsa-miR-429	STK4
hsa-miR-429	S100A11
hsa-miR-429	RAC2
hsa-miR-429	ETS1
hsa-miR-429	SIRT1
hsa-miR-429	SLC38A2
hsa-miR-429	AHNAK
hsa-miR-429	HNRNPH1
hsa-miR-429	DOCK11
hsa-miR-429	CD44
hsa-miR-429	PARP8
hsa-miR-429	PCBP1
hsa-miR-429	H3F3B
hsa-miR-429	ARPC3
hsa-miR-429	FAR1
hsa-miR-429	TUBB
hsa-miR-429	NAP1L1
hsa-miR-429	CLEC2D
hsa-miR-429	SHOC2
hsa-miR-429	HNRNPU
hsa-miR-429	SH3BGRL
hsa-miR-429	ZNF217
hsa-miR-429	RSRP1
hsa-miR-429	M6PR
hsa-miR-429	PNISR
hsa-miR-429	CAB39
hsa-miR-429	CRLF3
hsa-miR-429	RBBP4
hsa-miR-429	SFPQ
hsa-miR-429	WDR82
hsa-miR-429	OXA1L
hsa-miR-455-5p	DDX17
hsa-miR-455-5p	RNF149
hsa-miR-455-5p	XRCC5
hsa-miR-455-5p	FAR1
hsa-miR-455-5p	APLP2
hsa-miR-455-5p	SFPQ
hsa-miR-455-5p	ZFAND5
hsa-miR-495-3p	MCL1
hsa-miR-495-3p	PRKAR1A
hsa-miR-495-3p	CDC42SE2
hsa-miR-495-3p	SRSF5
hsa-miR-495-3p	CFL1
hsa-miR-495-3p	SF3B1
hsa-miR-495-3p	CNBP
hsa-miR-495-3p	SRSF8
hsa-miR-495-3p	GABARAP
hsa-miR-495-3p	RBM39
hsa-miR-495-3p	SNCA
hsa-miR-495-3p	SLC38A2
hsa-miR-495-3p	ARPC5
hsa-miR-495-3p	DDX6
hsa-miR-495-3p	RPL13
hsa-miR-495-3p	HNRNPH1
hsa-miR-495-3p	SERINC3
hsa-miR-495-3p	FAR1
hsa-miR-495-3p	TUBB
hsa-miR-495-3p	NAP1L1
hsa-miR-495-3p	PCNX1
hsa-miR-495-3p	HNRNPU
hsa-miR-495-3p	ZNF217
hsa-miR-495-3p	PPP1CB
hsa-miR-495-3p	LEPROTL1
hsa-miR-495-3p	ACAP2
hsa-miR-495-3p	PNISR
hsa-miR-495-3p	ZNF324B
hsa-miR-495-3p	MORF4L1
hsa-miR-495-3p	CRLF3
hsa-miR-495-3p	SSR1
hsa-miR-495-3p	WSB1
hsa-miR-495-3p	ZFAND5
hsa-miR-503-5p	MCL1
hsa-miR-503-5p	FTH1
hsa-miR-503-5p	DDX17
hsa-miR-503-5p	U2AF1
hsa-miR-503-5p	ACTR3
hsa-miR-503-5p	PRKAR1A
hsa-miR-503-5p	CDC42SE2
hsa-miR-503-5p	ROGDI
hsa-miR-503-5p	ETS1
hsa-miR-503-5p	SF3B1
hsa-miR-503-5p	CNBP
hsa-miR-503-5p	ARPC2
hsa-miR-503-5p	ATP6V0E1
hsa-miR-503-5p	CD55
hsa-miR-503-5p	RBM39
hsa-miR-503-5p	PNRC2
hsa-miR-503-5p	ZBTB39
hsa-miR-503-5p	SALL1
hsa-miR-503-5p	SRSF1
hsa-miR-503-5p	RNF149
hsa-miR-503-5p	RBL2
hsa-miR-503-5p	XRCC5
hsa-miR-503-5p	ARPC3
hsa-miR-503-5p	TUBB
hsa-miR-503-5p	ADAM10
hsa-miR-503-5p	ZNF217
hsa-miR-503-5p	WSB1
hsa-miR-503-5p	NPM1
hsa-miR-503-5p	PDCD4
hsa-miR-503-5p	TES
hsa-miR-504-5p	RPS9
hsa-miR-504-5p	SF3B1
hsa-miR-504-5p	ATP6V0E1
hsa-miR-504-5p	RPL29
hsa-miR-504-5p	SNCA
hsa-miR-504-5p	H3F3B
hsa-miR-504-5p	TUBB
hsa-miR-504-5p	CRLF3
hsa-miR-504-5p	RPL11
hsa-miR-504-5p	SFPQ
hsa-miR-504-5p	PJA2
hsa-miR-504-5p	WDR82
hsa-miR-622	MCL1
hsa-miR-622	PRKAR1A
hsa-miR-622	ATM
hsa-miR-622	AHNAK
hsa-miR-622	SERINC3
hsa-miR-622	SALL1
hsa-miR-622	SRSF1
hsa-miR-622	RBBP4
hsa-miR-622	SRSF3
hsa-miR-93-5p	B2M
hsa-miR-93-5p	MCL1
hsa-miR-93-5p	UBE2D3
hsa-miR-93-5p	ADIPOR1
hsa-miR-93-5p	ACTR3
hsa-miR-93-5p	FGL2
hsa-miR-93-5p	PRKAR1A
hsa-miR-93-5p	CDC42SE2
hsa-miR-93-5p	DDX5
hsa-miR-93-5p	LBR
hsa-miR-93-5p	ARPC2
hsa-miR-93-5p	GOLPH3
hsa-miR-93-5p	RNPS1
hsa-miR-93-5p	ATP6V0E1
hsa-miR-93-5p	SLC38A2
hsa-miR-93-5p	MGEA5
hsa-miR-93-5p	ZBTB39
hsa-miR-93-5p	DDX6
hsa-miR-93-5p	AHNAK
hsa-miR-93-5p	PURB
hsa-miR-93-5p	SERINC3
hsa-miR-93-5p	C6orf62
hsa-miR-93-5p	SRSF1
hsa-miR-93-5p	RBL2
hsa-miR-93-5p	USP15
hsa-miR-93-5p	TRAM1
hsa-miR-93-5p	SERINC1
hsa-miR-93-5p	SHOC2
hsa-miR-93-5p	SH3BGRL
hsa-miR-93-5p	FKBP1A
hsa-miR-93-5p	ZNF217
hsa-miR-93-5p	RSRP1
hsa-miR-93-5p	M6PR
hsa-miR-93-5p	ACAP2
hsa-miR-93-5p	PNISR
hsa-miR-93-5p	TAGAP
hsa-miR-93-5p	APLP2
hsa-miR-93-5p	MORF4L1
hsa-miR-93-5p	RPL11
hsa-miR-93-5p	TBC1D15
hsa-miR-93-5p	RAB7A
hsa-miR-93-5p	WDR82
hsa-miR-93-5p	WSB1
hsa-miR-93-5p	NPM1
hsa-miR-93-5p	PDCD4
hsa-miR-93-5p	STK17A
hsa-miR-93-5p	KLF3
hsa-miR-93-5p	EMP3
hsa-miR-93-5p	TGOLN2
hsa-miR-93-5p	TES
hsa-miR-98-5p	UBE2D3
hsa-miR-98-5p	CD74
hsa-miR-98-5p	DDX17
hsa-miR-98-5p	ADIPOR1
hsa-miR-98-5p	SLC25A39
hsa-miR-98-5p	ACTR3
hsa-miR-98-5p	ROGDI
hsa-miR-98-5p	STK4
hsa-miR-98-5p	LBR
hsa-miR-98-5p	ETS1
hsa-miR-98-5p	SF3B1
hsa-miR-98-5p	CNBP
hsa-miR-98-5p	ARPC2
hsa-miR-98-5p	SLC38A2
hsa-miR-98-5p	MGEA5
hsa-miR-98-5p	PFN1
hsa-miR-98-5p	ZBTB39
hsa-miR-98-5p	DDX6
hsa-miR-98-5p	AHNAK
hsa-miR-98-5p	PURB
hsa-miR-98-5p	SERINC3
hsa-miR-98-5p	SALL1
hsa-miR-98-5p	C6orf62
hsa-miR-98-5p	SRSF1
hsa-miR-98-5p	RBL2
hsa-miR-98-5p	PIAS1
hsa-miR-98-5p	FAR1
hsa-miR-98-5p	ADAM10
hsa-miR-98-5p	NAP1L1
hsa-miR-98-5p	ZNF217
hsa-miR-98-5p	M6PR
hsa-miR-98-5p	LEPROTL1
hsa-miR-98-5p	E2F4
hsa-miR-98-5p	WSB1
hsa-miR-98-5p	ZFAND5
hsa-miR-98-5p	PDCD4
hsa-miR-98-5p	KLF3
hsa-miR-98-5p	OXA1L
hsa-miR-98-5p	TGOLN2
hsa-miR-98-5p	TES
hsa-miR-99a-5p	RPL37A
hsa-miR-99a-5p	RBM39
hsa-miR-99a-5p	PPIA
hsa-miR-99a-5p	PFN1
hsa-miR-99a-5p	PURB
hsa-miR-99a-5p	DOCK11
hsa-miR-99a-5p	NAP1L1
hsa-miR-99a-5p	SHOC2
hsa-miR-99a-5p	ZNF217
hsa-miR-99a-5p	PPP1CB
hsa-miR-99a-5p	CAPNS1
hsa-miR-99a-5p	CFLAR
hsa-let-7d-5p	MCL1
hsa-let-7d-5p	FTH1
hsa-let-7d-5p	ADIPOR1
hsa-let-7d-5p	SLC25A39
hsa-let-7d-5p	FBXO7
hsa-let-7d-5p	CDC42SE2
hsa-let-7d-5p	STK4
hsa-let-7d-5p	LBR
hsa-let-7d-5p	NACA
hsa-let-7d-5p	ETS1
hsa-let-7d-5p	PFN1
hsa-let-7d-5p	ZBTB39
hsa-let-7d-5p	DDX6
hsa-let-7d-5p	DDA1
hsa-let-7d-5p	SALL1
hsa-let-7d-5p	PCBP1
hsa-let-7d-5p	CD37
hsa-let-7d-5p	FAR1
hsa-let-7d-5p	TUBB
hsa-let-7d-5p	NAP1L1
hsa-let-7d-5p	TRAM1
hsa-let-7d-5p	IVNS1ABP
hsa-let-7d-5p	SERINC1
hsa-let-7d-5p	FKBP1A
hsa-let-7d-5p	M6PR
hsa-let-7d-5p	E2F4
hsa-let-7d-5p	SSR1
hsa-let-7d-5p	SRSF3
hsa-let-7d-5p	OXA1L
hsa-let-7d-5p	TGOLN2

## Sheet: The identified miRNA sponges
The Identified miRNA sponge interactions by the Sensitivity Partial Pearson Correlation (SPPC) method
Sponge_1	Sponge_2	#shared miRNAs	p.adjusted_value of shared miRNAs	correlation	p.adjusted_value of positive correlation	sensitivity partial pearson correlation
DLEU2	SLC38A2	7	0.00534107	0.721301	3.63034e-31	0.293244
DLEU2	HNRNPU	6	0.0174341	0.695589	3.16177e-28	0.286695
DLEU2	CFLAR	4	0.00513233	0.530678	6.65201e-15	0.37294
DLEU2	SFPQ	7	0.000777587	0.699485	1.1874e-28	0.344895
DLEU2	STK4	5	0.0324443	0.550503	3.95667e-16	0.357485
DLEU2	LBR	6	0.0306725	0.6232	2.1239e-21	0.285934
DLEU2	SHOC2	6	0.0127475	0.745486	2.99539e-34	0.453879
DLEU2	CAB39	6	0.00173219	0.705361	2.63061e-29	0.314632
DLEU2	CRLF3	4	0.0252816	0.701974	6.29979e-29	0.315731
DLEU2	CLEC2D	5	1.33744e-05	0.668077	2.09198e-25	0.347299
ZFAS1	DDX17	6	0.0274034	0.278428	0.000119075	0.290024
ZFAS1	DDX5	6	0.0396003	0.544551	9.41477e-16	0.337329
ZFAS1	CNBP	5	0.0417596	0.687828	2.12471e-27	0.317278
MCL1	DDX5	12	0.0227357	0.535381	3.46299e-15	0.260958
MCL1	M6PR	8	0.0445286	0.371882	1.72966e-07	0.25303
MCL1	CDC42SE2	10	0.0121478	0.420444	2.30544e-09	0.273567
MCL1	PNISR	11	0.0175362	0.428239	1.07855e-09	0.271794
MCL1	TBC1D15	5	0.0283621	0.279231	0.000113578	0.315294
MCL1	CLEC2D	5	0.0283621	0.174938	0.0169312	0.292817
DDX17	PNRC2	6	0.0459639	0.323176	6.82251e-06	0.262824
ACTR3	DDX5	6	0.0218593	0.701214	7.65067e-29	0.257251
ACTR3	USP15	4	0.0411953	0.697228	2.09844e-28	0.31494
ACTR3	TRAM1	4	0.0411953	0.736834	4.15482e-33	0.273407
DDX5	LBR	10	0.0227267	0.615488	8.94548e-21	0.263668
DDX5	SHOC2	9	0.0252625	0.672681	7.40866e-26	0.423272
DDX5	PJA2	6	0.0105914	0.755122	1.40872e-35	0.314045
DDX5	WSB1	8	0.0415556	0.599617	1.52825e-19	0.253532
DDX5	IVNS1ABP	5	0.0148326	0.806479	7.39085e-44	0.284173
DDX5	TLR1	3	0.0191388	0.453076	8.39345e-11	0.270945
DDX5	USP15	6	0.0105914	0.598249	1.9376e-19	0.375065
DDX5	TBC1D15	4	0.0188646	0.564043	5.15787e-17	0.251772
SLC38A2	AHNAK	14	0.0183342	0.556996	1.50658e-16	0.269745
SLC38A2	RSRP1	5	0.00803634	0.5488	5.07935e-16	0.305236
SLC38A2	ADAM10	9	0.037602	0.724643	1.42402e-31	0.276713
SLC38A2	B2M	7	0.00534107	0.298962	3.39795e-05	0.271029
SLC38A2	STK4	10	0.0342804	0.66371	5.50686e-25	0.359016
SLC38A2	ATM	8	0.0186047	0.788613	1.02201e-40	0.258477
SLC38A2	DDX6	17	0.000204064	0.63834	1.12032e-22	0.35964
SLC38A2	PURB	14	0.0100246	0.657094	2.31379e-24	0.390052
SLC38A2	C6orf62	13	3.03788e-05	0.76585	3.948e-37	0.272844
SLC38A2	SHOC2	13	0.00281061	0.739231	2.02585e-33	0.293916
SLC38A2	M6PR	7	0.0410118	0.579774	4.28896e-18	0.269672
SLC38A2	CAB39	9	0.037602	0.685041	4.15122e-27	0.309908
SLC38A2	TES	10	0.017672	0.740081	1.56777e-33	0.340263
SLC38A2	ANKRD44	7	0.00534107	0.590012	7.8989e-19	0.272172
SLC38A2	PPP1CB	12	0.000103739	0.779945	2.66436e-39	0.313793
SLC38A2	PNISR	10	0.00805057	0.750445	6.32184e-35	0.289148
SLC38A2	TBC1D15	5	0.00803634	0.601753	1.05283e-19	0.295795
AHNAK	SERINC1	12	0.0419106	0.521481	2.31691e-14	0.328004
AHNAK	TC2N	5	0.0101512	0.481201	3.59427e-12	0.28607
AHNAK	RBBP4	6	0.00370908	0.697168	2.13032e-28	0.266644
SERINC1	SSR1	8	0.0137909	0.726049	9.56576e-32	0.408942
SERINC1	SFPQ	10	0.0296193	0.602297	9.56991e-20	0.314877
SERINC1	STK4	9	0.0387016	0.624569	1.63861e-21	0.267933
SERINC1	PDCD4	9	0.0387016	0.695235	3.45374e-28	0.285581
SERINC1	IVNS1ABP	5	0.0447728	0.722045	2.95128e-31	0.271125
SERINC1	MORF4L1	6	0.0174341	0.611364	1.89928e-20	0.287905
HNRNPU	WSB1	11	0.00322824	0.595856	2.92666e-19	0.253654
HNRNPU	USP15	6	0.0397514	0.589844	8.12543e-19	0.342986
SSR1	CRLF3	5	0.0258676	0.822688	5.2728e-47	0.268913
NPM1	WSB1	7	0.0215959	0.174949	0.0169243	0.312563
TGOLN2	DDX6	12	0.00371512	0.688654	1.73986e-27	0.260238
TGOLN2	PURB	11	0.00770695	0.41246	4.92134e-09	0.333727
TGOLN2	C6orf62	8	0.0157424	0.46076	3.65094e-11	0.374283
TGOLN2	HNRNPA2B1	8	0.0157424	0.504044	2.2316e-13	0.278644
TGOLN2	MORF4L1	5	0.0324443	0.384368	6.08567e-08	0.314301
ETS1	CDC42SE2	7	0.0316705	0.639026	9.76809e-23	0.287956
SIRT1	M6PR	5	0.0258676	0.640173	7.75916e-23	0.250112
CHPT1	TUBB	6	0.00205612	0.695826	2.98039e-28	0.264807
CHPT1	EMP3	3	0.012013	0.690939	9.9729e-28	0.306077
ADAM10	DDX6	10	0.0185068	0.767234	2.45532e-37	0.276726
ADAM10	TES	8	0.00498612	0.640838	6.78638e-23	0.329468
ADAM10	SF3B1	9	0.000267099	0.77623	1.03084e-38	0.297411
ADAM10	HNRNPA2B1	8	0.00498612	0.652755	5.81825e-24	0.290106
ADAM10	XRCC5	7	0.00523107	0.695527	3.2111e-28	0.278089
ADAM10	PNRC2	7	0.00523107	0.398824	1.71773e-08	0.430579
ADAM10	CNBP	6	0.0311155	0.564638	4.70592e-17	0.361498
ZNF217	PURB	15	0.0145964	0.529557	7.76093e-15	0.259109
EMP3	GABARAP	3	0.0201148	0.839488	1.26712e-50	0.265638
EMP3	SH3BGRL	4	0.00053549	0.688365	1.86592e-27	0.268434
B2M	DDX6	8	0.000654543	0.533522	4.48803e-15	0.263177
STK4	PURB	10	0.0342804	0.565081	4.39477e-17	0.287737
STK4	CAB39	9	0.00122581	0.68207	8.40594e-27	0.266522
STK4	NAP1L1	8	0.0415556	0.471503	1.10045e-11	0.29588
STK4	PPP1CB	7	0.0421714	0.625979	1.25261e-21	0.295583
LBR	ATM	8	0.0130736	0.514579	5.7675e-14	0.295787
LBR	PURB	13	0.0223084	0.480073	4.10105e-12	0.311004
LBR	C6orf62	13	1.39327e-05	0.677336	2.54394e-26	0.275377
LBR	TC2N	5	0.00628931	0.30766	1.9398e-05	0.304039
LBR	PNISR	10	0.00505259	0.523321	1.81044e-14	0.276945
ARPC2	KLF3	6	0.0274034	0.67888	1.77675e-26	0.295477
ARPC2	RAB7A	5	0.00919848	0.772065	4.55461e-38	0.31164
ATM	PSMB9	3	0.0200501	0.295042	4.34951e-05	0.309423
ATM	ANKRD44	4	0.0371322	0.6193	4.4164e-21	0.302109
DDX6	PURB	15	0.00797414	0.671215	1.03313e-25	0.38561
DDX6	C6orf62	11	0.00855957	0.776506	9.33085e-39	0.321816
DDX6	PSMB9	4	0.0320245	0.417599	3.0275e-09	0.314842
DDX6	SHOC2	14	0.00161047	0.699664	1.13471e-28	0.315874
DDX6	HNRNPA2B1	11	0.00855957	0.762162	1.37839e-36	0.286986
DDX6	WSB1	11	0.0379335	0.455987	6.13828e-11	0.320761
DDX6	PPP1CB	11	0.00323068	0.660838	1.03146e-24	0.320936
DDX6	PNISR	10	0.0185068	0.764215	6.89214e-37	0.320137
DDX6	USP15	7	0.0305765	0.576048	7.82426e-18	0.4269
DDX6	TRAM1	7	0.0305765	0.55029	4.0825e-16	0.344582
PURB	C6orf62	13	3.03788e-05	0.76117	1.92197e-36	0.337672
PURB	SHOC2	13	0.00281061	0.739504	1.86594e-33	0.316523
PURB	TES	10	0.017672	0.685025	4.16688e-27	0.353505
PURB	ANKRD44	7	0.00534107	0.482906	2.94139e-12	0.319649
PURB	PPP1CB	11	0.00115523	0.77878	4.08354e-39	0.339748
PURB	MORF4L1	6	0.039613	0.70117	7.73749e-29	0.287462
C6orf62	SHOC2	9	0.0139368	0.824475	2.26703e-47	0.262095
C6orf62	M6PR	6	0.0148169	0.644574	3.17923e-23	0.269414
C6orf62	TES	10	0.000122978	0.743671	5.2454e-34	0.285996
C6orf62	ANKRD44	7	0.000167455	0.623143	2.14713e-21	0.281321
SRSF1	WSB1	11	0.000370936	0.630478	5.26848e-22	0.251446
SRSF1	USP15	6	0.0153884	0.611362	1.8999e-20	0.36478
H3F3B	SHOC2	10	0.0100388	0.80214	4.58049e-43	0.258128
H3F3B	XRCC5	7	0.0215959	0.664333	4.80099e-25	0.336539
H3F3B	PNISR	8	0.0144531	0.583323	2.40214e-18	0.317841
RNF149	XRCC5	5	0.0258676	0.404961	9.85458e-09	0.318209
RNF149	TRAM1	4	0.0411953	0.249626	0.000590244	0.305165
SHOC2	CAB39	10	0.000973789	0.798091	2.41299e-42	0.277572
SHOC2	TES	10	0.0023752	0.628948	7.08391e-22	0.39054
SHOC2	CDC42SE2	7	0.0448448	0.759748	3.08545e-36	0.401587
SHOC2	WSB1	9	0.0423891	0.699448	1.1987e-28	0.300433
SHOC2	ANKRD44	6	0.0127475	0.545367	8.36751e-16	0.276528
SHOC2	IVNS1ABP	5	0.035009	0.833011	3.51323e-49	0.295965
SHOC2	PNISR	10	0.000973789	0.731242	2.15279e-32	0.355915
SHOC2	CLEC2D	5	0.0027771	0.558623	1.17893e-16	0.481867
CAB39	CLEC2D	5	0.000478135	0.408245	7.28574e-09	0.374646
WDR82	PPP1CB	8	0.0144531	0.499947	3.73018e-13	0.275462
WDR82	USP15	6	0.0153884	0.351879	8.43301e-07	0.330768
KLF3	RAB7A	7	0.000646455	0.856124	1.20903e-54	0.327574
OXA1L	ROGDI	3	0.0201148	0.680775	1.14047e-26	0.252354
TES	ANKRD44	5	0.0236385	0.481374	3.52181e-12	0.403239
FGL2	TBC1D15	3	0.00132908	0.395976	2.21446e-08	0.264797
CDC42SE2	SF3B1	6	0.0311155	0.825434	1.43597e-47	0.273944
CDC42SE2	WSB1	8	0.00350289	0.565915	3.8628e-17	0.274871
CDC42SE2	IVNS1ABP	5	0.00312593	0.863369	1.47882e-56	0.304282
SF3B1	XRCC5	6	0.0311155	0.832396	4.78125e-49	0.270772
SF3B1	CNBP	8	0.000560207	0.776824	8.31665e-39	0.365121
HNRNPA2B1	USP15	5	0.0443951	0.477711	5.39841e-12	0.404196
HNRNPA2B1	TRAM1	5	0.0443951	0.640962	6.61891e-23	0.254978
WSB1	PDCD4	9	0.00926747	0.594901	3.44743e-19	0.272991
WSB1	TC2N	4	0.0242143	0.303279	2.57839e-05	0.293041
WSB1	CRLF3	6	0.0311035	0.649854	1.06877e-23	0.250151
WSB1	RBL2	6	0.0153884	0.507872	1.37217e-13	0.255446
WSB1	CLEC2D	4	0.0242143	0.412434	4.93345e-09	0.411768
PDCD4	CNBP	7	0.0141459	0.799146	1.57053e-42	0.257952
ANKRD44	PPP1CB	6	0.00173219	0.479779	4.24406e-12	0.283294
TC2N	CRLF3	3	0.0333982	0.60013	1.39794e-19	0.303679
IVNS1ABP	TRAM1	4	0.00879583	0.705713	2.40057e-29	0.280823
CRLF3	RBBP4	4	0.00658792	0.746862	1.95221e-34	0.293202
CRLF3	CLEC2D	4	0.00241742	0.722841	2.36294e-31	0.266201
PNISR	USP15	5	0.0319411	0.657478	2.1308e-24	0.395629
USP15	TRAM1	5	0.00289125	0.58657	1.40454e-18	0.508573
